# Supplementary material for: Specification of Drosophila neuropeptidergic neurons by the splicing component brr2
Source: PLoS Genet. 2018 Aug 22;14(8):e1007496. doi: 10.1371/journal.pgen.1007496 (PMC6122834; doi:10.1371/journal.pgen.1007496)
Supplement: S3 Table — Values relative to the splicing events associated with the respective gene region (FlyBase gene symbol), using the Benjamini-Hochberg procedure. ES (Exon skipping), A5SS (Alternative 5' splice sites), A3SS (Alternative 3' splice sites), ME (Mutually exclusive exons), IR (Intron retention), AFE (Alternative first exons) and ALE (Alternative last exons), Ψ (PSI, percent Spliced). (XLSX) [file pgen.1007496.s003.xlsx]

## Sheet: Sheet1
Supplemental Table 3
Significant splicing events in Prp8 mutants (|ΔΨ|>0.03; q<0.25)
Gene region	event_id	event_type	path1	path2	logoddsP	logoddsW	logoddsratio	pvalue	qvalue	PSI_P	PSI_W	delta_PSI
14-3-3epsilon	FBtr0083565,FBtr0083566,FBtr0083567,FBtr0083568:chr3R:+:14068252:14075030:14-3-3epsilon:<2-3-4:6	A3SS	E4,E6	E4,E5,E6	-0.992018	-1.20904	-0.217021	0.0248052	0.149497	0.715617	0.759677	-0.0440597
14-3-3zeta	FBtr0088412,FBtr0088413,FBtr0088414,FBtr0088415,FBtr0088416,FBtr0088417,FBtr0088418,FBtr0088419,FBtr0100182,FBtr0100183,FBtr0332916,FBtr0332917:chr2R:+:5987181:5997192:14-3-3zeta:<1:7-8-9-10	A5SS	E1,E7	E1,E2,E7	-0.839153	-0.708374	0.130779	0.00126782	0.0211157	0.412563	0.380575	0.0319883
A2bp1	FBtr0113418,FBtr0113419,FBtr0305093,FBtr0305094,FBtr0305095,FBtr0305096,FBtr0305097,FBtr0332985:chr3L:+:10474511:10587112:A2bp1:<3:5	A5SS	E3,E5	E3,E4,E5	0.492476	1.4078	0.915324	0.00861943	0.0768417	0.322501	0.157737	0.164763
A2bp1	FBtr0113418,FBtr0113419,FBtr0305093,FBtr0305094,FBtr0305095,FBtr0305096,FBtr0305097,FBtr0332985:chr3L:+:10474511:10587112:A2bp1:8-9-10-11:13	ES	E11,E13	E11,E12,E13	2.22254	1.47247	-0.75007	0.0368092	0.189345	0.0569778	0.10686	-0.0498824
Aats-glupro	FBtr0084511,FBtr0084512:chr3R:-:19777851:19784117:Aats-glupro::6-7>	AFE	E1,E2,E3,E4,E6	E5,E6	1.70781	2.04198	0.334176	0.0166934	0.119552	0.101354	0.133986	-0.0326316
Abl	FBtr0075357,FBtr0112790,FBtr0330130,FBtr0330131,FBtr0330132,FBtr0330133,FBtr0330134,FBtr0330135,FBtr0330136:chr3L:-:16615469:16640982:Abl:10:12>	IR	E10,E12	E10,E11,E12	-1.23734	-1.92929	-0.691951	0.00819642	0.0747042	0.297543	0.457815	-0.160271
Ac78C	FBtr0301701,FBtr0305501,FBtr0330066,FBtr0330067,FBtr0333358:chr3L:-:21129546:21165030:Ac78C::4-5.6-7-8-9-10-11-12-13-14-15-16-17-18-19-20-21-22-23-24-25-26>	AFE	E2,E4	E3,E4	-0.980829	0.559616	1.54045	0.0122445	0.0999537	0.700726	0.32805	0.372676
Act5C	FBtr0070822,FBtr0070823,FBtr0100662,FBtr0100663:chrX:+:5794893:5799261:Act5C::3.4.5.6>	AFE	E1,E3	E2,E3	0.0110937	0.458198	0.447104	4.13009e-05	0.00190828	0.568639	0.456971	0.111669
Adar	FBtr0070299,FBtr0070300,FBtr0100557,FBtr0302654,FBtr0302655,FBtr0302656,FBtr0302657,FBtr0302658,FBtr0302659,FBtr0305497,FBtr0305498,FBtr0305499,FBtr0307895,FBtr0309961,FBtr0309962,FBtr0309963,FBtr0309964,FBtr0309965,FBtr0309966,FBtr0309967,FBtr0309968,FBtr0309969,FBtr0332901:chrX:+:1667751:1747700:Adar,CG42666:17-18-19:24-25-26.27>	ES	E19,E24	E19,E23,E24	-5.45604	-3.18553	2.2705	0.0177871	0.123078	0.985314	0.841886	0.143428
ade2	FBtr0079219,FBtr0079220,FBtr0079221:chr2L:-:6041177:6045970:ade2::4-5-6>	AFE	E1,E4	E3,E4	-0.510826	0.788457	1.29928	0.000429266	0.010203	0.554414	0.251706	0.302708
ade3	FBtr0079431,FBtr0100353:chr2L:-:7014860:7023940:ade3:<1-2-3-4:	ALE	E4,E5	E4,E6,E7,E8	-1.72722	-2.70805	-0.980829	0.00285321	0.03704	0.891316	0.762228	0.129088
Adh,Adhr	FBtr0006151,FBtr0100187,FBtr0100589,FBtr0100590,FBtr0100591,FBtr0100593,FBtr0100594:chr2L:+:14615554:14618902:Adh,Adhr::4-5-6.7-8-9>	AFE	E1,E4	E2,E3,E4	-0.33674	0.107976	0.444716	0.00895786	0.0793648	0.415122	0.31911	0.0960125
Adk1	FBtr0076017,FBtr0076018:chr3L:-:12193421:12197182:Adk1:<1.2:4-5-6.7>	ES	E2,E4	E2,E3,E4	0.387493	-0.055742	-0.443235	0.00993928	0.086085	0.199011	0.300059	-0.101049
AGO2	FBtr0075559,FBtr0075560,FBtr0331933:chr3L:+:15547212:15554142:AGO2:<1:3-5-6-7-8-9-10>	IR	E1,E3	E1,E2,E3	1.10707	2.18122	1.07416	8.30681e-07	9.9151e-05	0.122813	0.0451552	0.0776574
Akap200	FBtr0079664,FBtr0079665,FBtr0079666,FBtr0079667:chr2L:+:8415689:8430984:Akap200::4-5-6	AFE	E1,E4	E2,E4	-0.0365572	-0.374814	-0.338257	0.0069117	0.0654061	0.516551	0.59795	-0.0813983
Akap200	FBtr0079664,FBtr0079665,FBtr0079666,FBtr0079667:chr2L:+:8415689:8430984:Akap200:4-5-6:8	IR	E6,E8	E6,E7,E8	-0.303996	-0.526093	-0.222097	0.0231703	0.144294	0.181278	0.222177	-0.0408991
akirin	FBtr0076848,FBtr0076849,FBtr0302543,FBtr0302544,FBtr0302545,FBtr0332730:chr3L:+:7362942:7366811:akirin:<1:5.6-7-8.9>	A5SS	E1,E5	E1,E2,E5	-3.06682	-3.37734	-0.310515	0.0461453	0.218982	0.865529	0.896089	-0.0305606
Ald	FBtr0084994,FBtr0084995,FBtr0084999,FBtr0085000,FBtr0085001,FBtr0114544,FBtr0306657,FBtr0310660,FBtr0310661:chr3R:-:22079790:22087313:Ald:8-9:	ALE	E9,E11	E9,E12,E13	-0.885157	-1.44555	-0.560392	0.034257	0.179734	0.619037	0.480731	0.138306
Aldh-III	FBtr0088993,FBtr0088996,FBtr0300477,FBtr0300478,FBtr0300479,FBtr0300480,FBtr0300481,FBtr0308198,FBtr0310674,FBtr0310675,FBtr0310676,FBtr0310677:chr2R:-:3354383:3364667:Aldh-III:15-16-17-18-19-20-21:24-25	ME	E21,E22,E24	E21,E23,E24	1.03848	0.209721	-0.828762	9.45008e-10	4.0607e-07	0.7382	0.552938	0.185263
Aldh-III	FBtr0088993,FBtr0088996,FBtr0300477,FBtr0300478,FBtr0300479,FBtr0300480,FBtr0300481,FBtr0308198,FBtr0310674,FBtr0310675,FBtr0310676,FBtr0310677:chr2R:-:3354383:3364667:Aldh-III:<11.12.13:15-16-17-18-19-20-21	IR	E13,E15	E13,E14,E15	-1.09996	-1.95252	-0.852562	0.00643348	0.0625864	0.548197	0.735862	-0.187664
Alh	FBtr0081612,FBtr0081613,FBtr0081614,FBtr0081615,FBtr0113199,FBtr0113200,FBtr0300493,FBtr0300494,FBtr0300495,FBtr0330367:chr3R:-:2920317:2949907:Alh::9-10	AFE	E3,E4,E5,E6,E9	E8,E9	1.08317	0.40773	-0.675438	0.000385905	0.00942177	0.636527	0.483298	0.153229
Alh	FBtr0081612,FBtr0081613,FBtr0081614,FBtr0081615,FBtr0113199,FBtr0113200,FBtr0300493,FBtr0300494,FBtr0300495,FBtr0330367:chr3R:-:2920317:2949907:Alh:17-19:22.23-24>	A5SS	E19,E22	E19,E20,E21,E22	-0.146603	0.239404	0.386008	0.0302626	0.167568	0.173714	0.123712	0.0500018
alph	FBtr0085442,FBtr0085443,FBtr0085444,FBtr0085445,FBtr0085446,FBtr0309241:chr3R:+:25417541:25442879:alph:<1.2-6-7-9-10:12.13>	ES	E10,E12	E10,E11,E12	-1.15485	-1.74437	-0.589522	0.000116771	0.00390302	0.458759	0.615311	-0.156552
alpha-Man-I	FBtr0299632,FBtr0299633,FBtr0300511,FBtr0300512,FBtr0300513,FBtr0300514,FBtr0300515,FBtr0300516,FBtr0331759:chrX:-:10170087:10219990:alpha-Man-I::12	AFE	E10,E12	E11,E12	4.2485	2.63254	-1.61595	0.0588633	0.247733	0.0777952	0.374279	-0.296484
alt	FBtr0089412,FBtr0089413,FBtr0089414,FBtr0089415,FBtr0089416,FBtr0089417:chr3R:-:13499902:13508234:alt:7-8:10-11-12>	ES	E8,E10	E8,E9,E10	0.285101	0.940983	0.655882	9.67047e-05	0.00343422	0.204709	0.116677	0.0880319
alt	FBtr0089412,FBtr0089413,FBtr0089414,FBtr0089415,FBtr0089416,FBtr0089417:chr3R:-:13499902:13508234:alt:<1:7-8	ES	E1,E7	E1,E3,E7	0.527867	0.905117	0.37725	0.0335924	0.177566	0.215982	0.160963	0.0550186
amd	FBtr0081153,FBtr0081154:chr2L:+:19110158:19114110:amd::4>	AFE	E1,E2,E4	E3,E4	2.16286	2.72937	0.566513	0.000276399	0.00737693	0.904937	0.945356	-0.040419
Amph	FBtr0087828,FBtr0333099,FBtr0333100:chr2R:+:8481108:8499573:Amph:9:11-13>	A5SS	E9,E10,E11	E9,E11	0.0976385	-0.170626	-0.268264	0.0505185	0.227545	0.157452	0.125149	0.0323035
Amun	FBtr0073615,FBtr0073616,FBtr0073617,FBtr0073618,FBtr0073619,FBtr0303336,FBtr0303337,FBtr0303338,FBtr0303339,FBtr0333796,FBtr0333797:chrX:-:11604152:11609598:Amun:10:12.13-14.15>	IR	E10,E12	E10,E11,E12	1.14067	2.03252	0.891854	1.64143e-07	2.62214e-05	0.119842	0.0519496	0.0678922
Ank2	FBtr0303110,FBtr0303111,FBtr0303112,FBtr0303113,FBtr0303114,FBtr0303115,FBtr0303117,FBtr0303118,FBtr0303119,FBtr0303120,FBtr0303121,FBtr0303122,FBtr0303123,FBtr0303124,FBtr0303125,FBtr0334060,FBtr0334061,FBtr0334062:chr3L:-:7648488:7711495:Ank2:5-6-7-8:	ALE	E8,E10,E12,E13,E14	E8,E9	2.30307	1.58775	-0.715316	0.0128791	0.102865	0.55524	0.382572	0.172668
Ant2,sesB	FBtr0073421,FBtr0073422,FBtr0073423,FBtr0073424,FBtr0073425,FBtr0073426,FBtr0333963:chrX:-:10672986:10680940:Ant2,sesB::5-6-7>	AFE	E1,E2,E5	E3,E5	0.457076	0.0822567	-0.374819	0.00114515	0.0196043	0.625701	0.535825	0.089876
Antp	FBtr0081646,FBtr0081647,FBtr0081648,FBtr0081649,FBtr0081650,FBtr0081651,FBtr0081652,FBtr0081653,FBtr0081654,FBtr0081655,FBtr0081656:chr3R:-:2721974:2824950:Antp:7:10.11>	A5SS	E7,E10	E7,E8,E10	-1.27841	-0.611802	0.666604	0.0392434	0.198096	0.744641	0.600466	0.144174
aPKC	FBtr0303429,FBtr0303430,FBtr0303431,FBtr0303432,FBtr0303433,FBtr0303434,FBtr0303435,FBtr0303436,FBtr0303437,FBtr0329887,FBtr0329888,FBtr0329889,FBtr0329890:chr2R:-:10831962:10850451:aPKC:13-14-15-16-19-20-21:24.25.26>	IR	E21,E24	E21,E22,E23,E24	-0.644829	0.035932	0.680761	0.00279318	0.0364811	0.463441	0.316114	0.147327
app	FBtr0301052,FBtr0301053,FBtr0301054,FBtr0301055,FBtr0301056,FBtr0301057,FBtr0304661,FBtr0334102,FBtr0334103:chr3L:-:12199337:12259941:app:<1-2:5-6-7-9-10-11-12-14	ES	E2,E5	E2,E3,E5	0.303682	-0.693147	-0.99683	0.00248471	0.0334696	0.333137	0.579484	-0.246347
Appl	FBtr0070109,FBtr0307291,FBtr0307292,FBtr0307293,FBtr0307294,FBtr0307295:chrX:+:424502:473077:Appl:16-17:19.20>	A5SS	E17,E19	E17,E18,E19	0.502629	1.01792	0.515295	0.0421066	0.20678	0.331151	0.228052	0.103099
Arf51F	FBtr0087375,FBtr0087376,FBtr0087377,FBtr0087378,FBtr0087379:chr2R:+:11209978:11212399:Arf51F:2:5-6-7>	ES	E2,E5	E2,E4,E5	1.55931	1.99178	0.432467	0.0139491	0.107418	0.134193	0.0857389	0.0484543
Arf79F	FBtr0078571,FBtr0078573,FBtr0078574,FBtr0078575,FBtr0112858,FBtr0299906,FBtr0299907,FBtr0332054:chr3L:-:22861478:22865331:Arf79F:<3.4:	ALE	E4,E5	E4,E8,E9,E10,E11,E12,E13	-2.89463	-3.21582	-0.321185	0.0186533	0.126424	0.35862	0.290445	0.0681749
arg	FBtr0070088,FBtr0333318:chrX:+:403450:422067:arg::6-7>	AFE	E4,E6	E5,E6	0.212561	1.40282	1.19026	0.00066568	0.0135565	0.43997	0.194404	0.245566
Arpc3B	FBtr0074410,FBtr0113478:chrX:-:16998603:16999885:Arpc3B:<1.2:4-5>	IR	E2,E4	E2,E3,E4	1.12678	1.84583	0.719044	0.0258458	0.154107	0.0935159	0.0454835	0.0480324
Ars2	FBtr0086018,FBtr0086020,FBtr0086021,FBtr0310665,FBtr0310666,FBtr0310667:chr2R:-:1968332:1973128:Ars2:7-8:10-11-12	ES	E8,E10	E8,E9,E10	1.49092	0.663877	-0.827043	0.00138494	0.0224969	0.0391977	0.0852262	-0.0460285
Ars2	FBtr0086018,FBtr0086020,FBtr0086021,FBtr0310665,FBtr0310666,FBtr0310667:chr2R:-:1968332:1973128:Ars2:10-11-12:14>	A3SS	E12,E14	E12,E13,E14	-0.496937	0.164755	0.661692	0.00440739	0.0491911	0.15641	0.088183	0.0682275
Asph	FBtr0087219,FBtr0087220,FBtr0300575,FBtr0305090,FBtr0305091,FBtr0305092,FBtr0310447:chr2R:+:11997989:12004501:Asph:<1-3-4-5:7-8	A3SS	E5,E7	E5,E6,E7	-4.38192	-2.42896	1.95296	0.00837635	0.0750401	0.989073	0.917356	0.0717175
Asph	FBtr0087219,FBtr0087220,FBtr0300575,FBtr0305090,FBtr0305091,FBtr0305092,FBtr0310447:chr2R:+:11997989:12004501:Asph:12:14-15	A3SS	E12,E14	E12,E13,E14	-2.55068	-3.27336	-0.722686	0.00889851	0.0791091	0.573879	0.73602	-0.162141
Asph	FBtr0087219,FBtr0087220,FBtr0300575,FBtr0305090,FBtr0305091,FBtr0305092,FBtr0310447:chr2R:+:11997989:12004501:Asph:14-15:17-18>	A5SS	E15,E17	E15,E16,E17	-0.312683	0.0321867	0.34487	0.0149149	0.111838	0.555562	0.471527	0.0840351
Ate1	FBtr0086317,FBtr0086318,FBtr0086319:chr2R:-:16141296:16144886:Ate1:<1-2-4:7-8-9-10>	ME	E4,E5,E7	E4,E6,E7	-0.106971	-0.630769	-0.523798	0.00676711	0.0646184	0.466802	0.346871	0.11993
Atet	FBtr0077426,FBtr0077427,FBtr0112898,FBtr0112899:chr2L:+:4333925:4345776:Atet:<1:3-6-7-8-9-10.11>	A5SS	E1,E3	E1,E2,E3	-2.7169	-1.69513	1.02177	0.00373567	0.0438584	0.662181	0.436449	0.225732
Atg18	FBtr0076691,FBtr0076692,FBtr0076693,FBtr0321319,FBtr0321320,FBtr0321321:chr3L:+:8180094:8184065:Atg18:8-9:11	IR	E9,E10,E11	E9,E11	2.55205	1.93601	-0.616037	0.0474415	0.220385	0.829382	0.723817	0.105565
ATPsyn-gamma	FBtr0085539,FBtr0085540,FBtr0085541:chr3R:-:25573425:25574885:ATPsyn-gamma:<1.2:4.5.6>	IR	E2,E4	E2,E3,E4	-0.266913	-0.0288591	0.238054	0.000782818	0.0153295	0.383483	0.327789	0.0556942
B4	FBtr0080513,FBtr0080514,FBtr0332509:chr2L:-:13500623:13549328:B4:<1:5-6-7-8-9.10>	ES	E1,E5	E1,E4	-1.16315	-20	-18.8368	0.00554739	0.056393	0.347886	1	-0.652114
bbc	FBtr0087699,FBtr0087700,FBtr0305993,FBtr0332927,FBtr0332928:chr2R:-:9374138:9382367:bbc:<1-3-4:8-9.10>	ME	E4,E5,E8	E4,E6,E8	1.32082	1.11997	-0.200842	0.0587554	0.247733	0.789369	0.754193	0.0351756
bbg	FBtr0273422,FBtr0273423,FBtr0273424,FBtr0273425,FBtr0273426,FBtr0273427,FBtr0273428,FBtr0308596:chr3L:-:14405924:14529376:bbg:<1:3-4	A5SS	E1,E3	E1,E2,E3	-0.916291	0.0909718	1.00726	0.0149781	0.111838	0.671457	0.462964	0.208493
bbg	FBtr0273422,FBtr0273423,FBtr0273424,FBtr0273425,FBtr0273426,FBtr0273427,FBtr0273428,FBtr0308596:chr3L:-:14405924:14529376:bbg::6	AFE	E3,E4,E6	E5,E6	2.38996	1.70138	-0.688583	0.0263621	0.155356	0.207941	0.120734	0.0872072
bbg	FBtr0273422,FBtr0273423,FBtr0273424,FBtr0273425,FBtr0273426,FBtr0273427,FBtr0273428,FBtr0308596:chr3L:-:14405924:14529376:bbg:11:	ALE	E11,E12	E11,E13,E14	0.916291	1.07853e-09	-0.916291	0.0407251	0.202899	0.855321	0.700306	0.155015
be	FBtr0073956,FBtr0073957,FBtr0310270:chrX:+:14918466:14936093:be:<1-2-3-4-5:7>	A5SS	E5,E7	E5,E6,E7	-0.574541	-1.02165	-0.44711	0.0456225	0.217339	0.0956837	0.141429	-0.0457453
BEAF-32	FBtr0087441,FBtr0087442,FBtr0305588:chr2R:+:10657938:10660135:BEAF-32::4>	AFE	E1,E4	E2,E3,E4	-1.24725	-0.839439	0.407814	0.0516905	0.23017	0.661143	0.559756	0.101387
beat-VI	FBtr0085289,FBtr0333336:chr3R:+:24243929:24300536:beat-VI:<1:3-4-5-6-7.8>	ES	E1,E3	E1,E2,E3	-0.998529	-2.26176	-1.26323	0.0484206	0.22229	0.601015	0.808346	-0.207331
Bet1	FBtr0074989,FBtr0074990:chr3L:+:19254493:19255355:Bet1:<1:3.4>	A5SS	E1,E3	E1,E2,E3	0.741156	0.287682	-0.453474	0.0291857	0.163722	0.196206	0.274501	-0.078295
betaggt-I	FBtr0078991,FBtr0330714:chr2L:+:4945597:4948324:betaggt-I:<1-2-3-4:6>	IR	E4,E6	E4,E5,E6	-2.17224	-2.94794	-0.775696	0.0419554	0.206273	0.756517	0.874434	-0.117917
Bj1	FBtr0077074,FBtr0077075,FBtr0077076:chr3L:-:5923361:5925873:Bj1:<2:4-5-6>	IR	E2,E4	E2,E3,E4	-3.30322	-2.14843	1.15478	0.015297	0.11294	0.931273	0.793755	0.137518
bl	FBtr0086219,FBtr0086220,FBtr0086221,FBtr0086222,FBtr0301760:chr2R:+:16475009:16494359:bl:<1-3-4:6-7-9-10	ES	E4,E6	E4,E5,E6	-3.78418	-3.05452	0.729652	0.0236284	0.145878	0.959188	0.9148	0.0443883
bmm	FBtr0075699,FBtr0300190:chr3L:-:14769595:14779512:bmm:<1-2-3-4-5-6:8>	ES	E6,E8	E6,E7,E8	-0.877013	-0.516543	0.36047	0.0508758	0.228436	0.389551	0.303398	0.0861527
bol	FBtr0076538,FBtr0076539,FBtr0076540,FBtr0076541,FBtr0300462,FBtr0331858:chr3L:-:9091207:9123452:bol:<2:4-5-7-8	ES	E2,E4	E2,E3,E4	-3.01152	-3.95124	-0.939728	0.0139997	0.107483	0.827478	0.920929	-0.0934513
bowl	FBtr0077490,FBtr0077491,FBtr0077492,FBtr0077493,FBtr0307026,FBtr0307027,FBtr0307028,FBtr0307029:chr2L:+:3771197:3784121:bowl::11-12>	AFE	E10,E11	E9,E11	-2.15355	-1.32442	0.829131	0.0585447	0.247718	0.934135	0.864848	0.0692879
brat	FBtr0081158,FBtr0081159,FBtr0081160,FBtr0304151:chr2L:+:19133815:19179758:brat:5-6:9.10>	IR	E6,E9	E6,E7,E8,E9	-2.70484	-1.95028	0.754555	0.0479483	0.220899	0.352158	0.205	0.147158
bru-3	FBtr0330343,FBtr0330344,FBtr0330345,FBtr0330346,FBtr0330347,FBtr0330348,FBtr0330349,FBtr0330350,FBtr0330351,FBtr0330352,FBtr0330353,FBtr0330354,FBtr0330355,FBtr0330356,FBtr0330357:chr3L:-:13515292:13796500:bru-3:10-12-13-14:16	A3SS	E14,E16	E14,E15,E16	0.59652	-0.494696	-1.09122	0.00102578	0.0187565	0.260987	0.539577	-0.278589
bru-3	FBtr0330343,FBtr0330344,FBtr0330345,FBtr0330346,FBtr0330347,FBtr0330348,FBtr0330349,FBtr0330350,FBtr0330351,FBtr0330352,FBtr0330353,FBtr0330354,FBtr0330355,FBtr0330356,FBtr0330357:chr3L:-:13515292:13796500:bru-3:<6-7:9	ES	E7,E9	E7,E8,E9	0.590493	1.23676	0.64627	0.0468096	0.218982	0.219514	0.125491	0.0940235
bt	FBtr0089793,FBtr0301340,FBtr0301341:chr4:+:745029:796707:bt:14-15:17-18-19	ES	E15,E17	E15,E16,E17	-3.53935	-20	-16.4607	0.00232331	0.0322041	0.949689	1	-0.0503108
bt	FBtr0089793,FBtr0301340,FBtr0301341:chr4:+:745029:796707:bt:20:22	ES	E20,E22	E20,E21,E22	-0.828892	-1.33798	-0.509083	0.00533474	0.0553705	0.337882	0.446637	-0.108755
bt	FBtr0089793,FBtr0301340,FBtr0301341:chr4:+:745029:796707:bt:<1-2-3-5-6:10-11-12	ES	E6,E10	E6,E7,E8,E9,E10	-1.77392	-2.31222	-0.538291	0.0170443	0.121057	0.304404	0.401909	-0.0975046
bt	FBtr0089793,FBtr0301340,FBtr0301341:chr4:+:745029:796707:bt:10-11-12:14-15	ES	E12,E14	E12,E13,E14	-3.04154	-4.15104	-1.1095	0.0586604	0.247733	0.768055	0.893131	-0.125076
Btk29A	FBtr0079615,FBtr0079616,FBtr0079617,FBtr0079618,FBtr0112835,FBtr0112836,FBtr0330692,FBtr0330693:chr2L:-:8258754:8301079:Btk29A:<9:12	A3SS	E9,E11	E9,E12	0.944462	0.457833	-0.486629	0.0507207	0.227978	0.702956	0.598585	0.104371
bun	FBtr0299652,FBtr0299656,FBtr0299657,FBtr0299658,FBtr0300521,FBtr0300522,FBtr0300523,FBtr0300524,FBtr0329826:chr2L:-:12455539:12546630:bun::19.20.21.22>	AFE	E17,E19	E18,E19	-0.619494	-0.217478	0.402016	0.0124976	0.101325	0.127498	0.0849562	0.0425419
C3G	FBtr0299791,FBtr0299792,FBtr0299793,FBtr0299794,FBtr0299795,FBtr0300526:chrX:-:6675448:6697579:C3G:6-7-8-9:11-12-13-14-15-16-17-18>	ES	E9,E10,E11	E9,E11	2.31166	3.5215	1.20984	0.0183072	0.125665	0.710728	0.893499	-0.182771
cac	FBtr0307313,FBtr0307314,FBtr0307315,FBtr0307316,FBtr0307317,FBtr0307318,FBtr0307319,FBtr0307320,FBtr0307321,FBtr0307322,FBtr0307323,FBtr0307324,FBtr0307325,FBtr0308609,FBtr0332391:chrX:-:11825981:11879120:cac:27-29-30-31-32:	ALE	E32,E34	E32,E36,E37,E39,E40,E41,E42,E43,E44	-3.93834	-2.32239	1.61595	0.00396094	0.045405	0.318027	0.697515	-0.379489
CadN	FBtr0081013,FBtr0081014,FBtr0081015,FBtr0081016,FBtr0081017,FBtr0081018,FBtr0081019,FBtr0081020,FBtr0100313,FBtr0100314,FBtr0100315,FBtr0100316:chr2L:-:17647052:17778340:CadN:21-22-23-24:27-28-29.30>	ME	E24,E25,E27	E24,E26,E27	-1.07479	0.005514	1.08031	0.0011208	0.0194309	0.247998	0.496151	-0.248153
calypso	FBtr0087245,FBtr0087246:chr2R:-:12081561:12083807:calypso:<1:3-4>	A3SS	E1,E3	E1,E2,E3	-3.68888	-0.693147	2.99573	0.000511908	0.0113385	0.962701	0.553672	0.409028
caps	FBtr0075832,FBtr0075833,FBtr0305480:chr3L:+:13221791:13272742:caps:<1-2-3:5>	ES	E3,E5	E3,E4,E5	-1.80418	-2.72867	-0.924488	0.00521197	0.054624	0.531784	0.743326	-0.211542
Caps	FBtr0091630,FBtr0091631,FBtr0307333,FBtr0307334,FBtr0333702:chr4:+:1234562:1275485:Caps:<2-3-4-5-6-7-8-9:13-14-15-16	ES	E9,E10,E11,E12,E13	E9,E13	3.89564	4.9028	1.00716	0.013618	0.106394	0.895025	0.957968	-0.0629423
CASK	FBtr0084161,FBtr0084162,FBtr0112872,FBtr0112873,FBtr0301327,FBtr0301328,FBtr0330368:chr3R:-:17611483:17648364:CASK::11-12	AFE	E10,E11	E9,E11	-0.267986	-1.22636	-0.958372	0.024469	0.148544	0.757204	0.864708	-0.107504
CCHa2	FBtr0082762,FBtr0303262,FBtr0303263:chr3R:-:9214780:9220912:CCHa2::4-5-6>	AFE	E1,E4	E2,E4	0.748207	3.30322	2.55501	1.20882e-05	0.000787017	0.198608	0.0274301	0.171178
cdc14	FBtr0079492,FBtr0301330,FBtr0301331:chr2L:-:7802414:7810697:cdc14::9	AFE	E7,E9	E8,E9	-1.09861	-3.01431	-1.9157	0.000419766	0.0100767	0.859356	0.975424	-0.116068
Cdep	FBtr0078840,FBtr0110958:chr3R:+:736277:771298:Cdep:<1-3-4-5-6-7-8:11-12-13-14-15>	ES	E8,E10,E11	E8,E11	4.93083	3.78568	-1.14514	0.0398874	0.199745	0.980921	0.932508	0.0484126
cenB1A	FBtr0084368,FBtr0084369,FBtr0300968:chr3R:+:18944124:18949941:cenB1A:7:9-10-11-13>	A3SS	E7,E9	E7,E8,E9	0.133531	1.30992	1.17639	0.00166878	0.025794	0.380166	0.16319	0.216976
cenB1A	FBtr0084368,FBtr0084369,FBtr0300968:chr3R:+:18944124:18949941:cenB1A::7	AFE	E1,E2,E3,E4,E5,E7	E6,E7	4.98703	3.66946	-1.31756	0.0157831	0.115932	0.805021	0.543318	0.261703
cenG1A	FBtr0080546,FBtr0080547,FBtr0080548:chr2L:+:13835566:13898715:cenG1A::5-6-7-8-9-10>	AFE	E3,E5	E4,E5	1.26695	0.642503	-0.624444	0.018922	0.128044	0.311826	0.445634	-0.133807
Cep135	FBtr0075638,FBtr0303375,FBtr0333853:chr3L:+:15109836:15121129:Cep135:<1-2-3-4-5-6-7-8-9-11-12:14-15>	A5SS	E12,E14	E12,E13,E14	0.427444	-0.500775	-0.928219	0.0340379	0.179022	0.165263	0.323681	-0.158419
Cha,VAChT	FBtr0083671,FBtr0089367,FBtr0089368:chr3R:+:14531173:14558068:Cha,VAChT:<1.2.3:	ALE	E3,E4	E3,E5,E6,E7,E8,E9,E10,E11,E12,E13	-1.28402	-2.07944	-0.795426	0.00128344	0.0212932	0.124548	0.0653424	0.0592054
Chc	FBtr0074179,FBtr0074180,FBtr0074181,FBtr0074182,FBtr0112797,FBtr0112798:chrX:-:15722018:15729507:Chc:<2.3.4:8-9-10-11-12-13>	A5SS	E4,E8	E5,E8	1.90935	2.41111	0.50176	0.0402719	0.200985	0.076642	0.0459611	0.030681
Chd64	FBtr0073270,FBtr0310531:chr3L:-:4114288:4122388:Chd64::3-4>	AFE	E1,E3	E2,E3	2.59592	3.13475	0.53883	0.036838	0.189345	0.369369	0.259535	0.109835
CheB42c,mim	FBtr0113470,FBtr0302034,FBtr0302035,FBtr0302577,FBtr0302578,FBtr0302579,FBtr0306614,FBtr0306615,FBtr0306616,FBtr0332941,FBtr0332942,FBtr0332943,FBtr0332944,FBtr0332945:chr2R:-:2812191:2859142:CheB42c,mim:18:23	ES	E18,E23	E18,E19,E20,E21,E22,E23	-2.75317	-3.48372	-0.730548	0.0013144	0.0215571	0.597589	0.742593	-0.145004
cher	FBtr0089471,FBtr0089473,FBtr0290013,FBtr0290014,FBtr0290015,FBtr0303364,FBtr0332166,FBtr0332167:chr3R:-:12917254:12950954:cher:<17:19	A3SS	E17,E19	E17,E18,E19	-2.00882	-0.863493	1.14533	0.00190354	0.0278215	0.712197	0.441011	0.271186
cic	FBtr0305026,FBtr0305027,FBtr0305028,FBtr0305029,FBtr0305030,FBtr0305031:chr3R:+:16078491:16128194:cic:18-19:21-22	A3SS	E19,E21	E19,E20,E21	-1.09861	-2.21557	-1.11696	0.00016122	0.00480933	0.700843	0.876755	-0.175911
cindr	FBtr0085704,FBtr0085705,FBtr0085706,FBtr0085707,FBtr0310068,FBtr0310069,FBtr0310070,FBtr0310071,FBtr0310072,FBtr0310424:chr3R:+:26634337:26652722:cindr:<9:12-13	A5SS	E9,E10,E12	E9,E12	-0.776529	0.0909718	0.867501	0.0184679	0.125867	0.235767	0.416907	-0.18114
Cirl	FBtr0290112,FBtr0301363,FBtr0305080,FBtr0305081,FBtr0305082,FBtr0310448,FBtr0310449,FBtr0310450:chr2R:+:4502226:4512708:Cirl:15-16:	ALE	E16,E17	E16,E18,E19,E20,E21,E22,E23	-3.11836	-2.55153	0.566825	0.00547525	0.0560322	0.148766	0.226232	-0.0774657
Cirl	FBtr0290112,FBtr0301363,FBtr0305080,FBtr0305081,FBtr0305082,FBtr0310448,FBtr0310449,FBtr0310450:chr2R:+:4502226:4512708:Cirl:6:11-12-13	IR	E6,E11	E6,E7,E8,E9,E10,E11	-3.12063	-3.56443	-0.443793	0.0336311	0.177566	0.788988	0.823631	-0.0346436
Cka	FBtr0079536,FBtr0079537,FBtr0079538,FBtr0079539,FBtr0306000,FBtr0306001,FBtr0333096:chr2L:+:8030720:8040826:Cka:10:13.14.15>	ES	E10,E13	E10,E12,E13	1.01637	2.75457	1.7382	0.000299841	0.00785619	0.150767	0.031088	0.119679
Cka	FBtr0079536,FBtr0079537,FBtr0079538,FBtr0079539,FBtr0306000,FBtr0306001,FBtr0333096:chr2L:+:8030720:8040826:Cka:7-8:10	A3SS	E8,E10	E8,E9,E10	-0.355123	0.0296318	0.384755	0.0232859	0.144804	0.487759	0.394967	0.0927925
CkIIalpha	FBtr0070042,FBtr0070043,FBtr0070044,FBtr0111141:chr3L:+:23090438:23096560:CkIIalpha:<3:5	A3SS	E3,E5	E3,E4,E5	0.616607	1.3589	0.742288	0.000116089	0.00390302	0.262214	0.145424	0.11679
CkIIbeta	FBtr0073558,FBtr0073560,FBtr0073561,FBtr0073562,FBtr0100540,FBtr0299569,FBtr0307896,FBtr0308084,FBtr0308085,FBtr0333204:chrX:+:11686565:11695620:CkIIbeta::8-9-10-11-12	AFE	E1,E2,E8	E4,E5,E6,E7,E8	0.940172	0.532122	-0.408049	0.000287776	0.00758635	0.129209	0.183193	-0.0539842
CkIIbeta	FBtr0073558,FBtr0073560,FBtr0073561,FBtr0073562,FBtr0100540,FBtr0299569,FBtr0307896,FBtr0308084,FBtr0308085,FBtr0333204:chrX:+:11686565:11695620:CkIIbeta:8-9-10-11-12:14.15.16.17.18>	A3SS	E12,E14	E12,E13,E14	-3.71357	-4.30784	-0.59427	0.021338	0.138086	0.918708	0.952851	-0.034143
CLIP-190	FBtr0080975,FBtr0080976,FBtr0080977,FBtr0290262,FBtr0290263,FBtr0301440,FBtr0301441,FBtr0301442,FBtr0332451,FBtr0332452,FBtr0332453,FBtr0332454,FBtr0332455,FBtr0332456:chr2L:+:17384699:17409698:CLIP-190:13-14-15:17	IR	E15,E17	E15,E16,E17	-0.487015	0.873273	1.36029	0.000109554	0.00373613	0.230283	0.0625867	0.167697
CLS	FBtr0084929,FBtr0084930,FBtr0084931,FBtr0331359:chr3R:-:21510957:21513092:CLS:<2.3:6-7-8-9>	A5SS	E3,E6	E4,E6	20	1.94591	-18.0541	0.00130791	0.0215328	0	0.0778516	-0.0778516
cnc	FBtr0306744,FBtr0306745,FBtr0306746,FBtr0306747,FBtr0306748,FBtr0306749,FBtr0306750,FBtr0306751,FBtr0306752,FBtr0306753,FBtr0306754,FBtr0306755,FBtr0308226,FBtr0308227,FBtr0330372:chr3R:-:19011301:19052430:cnc::14-15-16-17	AFE	E11,E12,E14	E13,E14	2.73003	1.66188	-1.06814	0.0069294	0.0654061	0.955997	0.877699	0.0782981
cnc	FBtr0306744,FBtr0306745,FBtr0306746,FBtr0306747,FBtr0306748,FBtr0306749,FBtr0306750,FBtr0306751,FBtr0306752,FBtr0306753,FBtr0306754,FBtr0306755,FBtr0308226,FBtr0308227,FBtr0330372:chr3R:-:19011301:19052430:cnc::24-25.26>	AFE	E14,E15,E16,E17,E24	E18,E19,E20,E24	-0.236389	-0.514621	-0.278232	0.0122213	0.0999537	0.821256	0.856223	-0.034967
cnn	FBtr0087703,FBtr0087704,FBtr0100654,FBtr0100656,FBtr0301395,FBtr0306635,FBtr0309888,FBtr0309889,FBtr0309890,FBtr0309891,FBtr0309892,FBtr0309893:chr2R:-:9326818:9337980:cnn:3:5	A5SS	E3,E5	E3,E4,E5	-1.93565	-2.94444	-1.00879	0.0414754	0.204615	0.555342	0.768306	-0.212964
Cnot4	FBtr0080009,FBtr0080010,FBtr0080011,FBtr0080012,FBtr0080013,FBtr0080014,FBtr0304112,FBtr0304113,FBtr0331637,FBtr0331638,FBtr0331639:chr2L:+:10396715:10403206:Cnot4:15:17-18-19-20-21-22-23-24-25-26.27>	A5SS	E15,E17	E15,E16,E17	-0.217413	-0.80866	-0.591247	0.000429777	0.010203	0.455406	0.600237	-0.14483
Cnx99A	FBtr0085437,FBtr0085438,FBtr0110908,FBtr0110909:chr3R:-:25140964:25145366:Cnx99A:<1.2:4-5-6-7-8-9-11-12-13.14>	IR	E2,E4	E2,E3,E4	-3.09892	-2.48603	0.612884	0.00130788	0.0215328	0.911896	0.850807	0.061089
cora	FBtr0086506,FBtr0086508,FBtr0086509,FBtr0301279:chr2R:+:15116569:15131256:cora:<1-2-3-4-5-6-7-8-11-12-13.14:17-18-19>	ES	E14,E17	E14,E15	-2.29685	-1.78523	0.511627	0.0105216	0.0900624	0.642427	0.517825	0.124602
Cortactin	FBtr0084039,FBtr0306347,FBtr0306348,FBtr0306349:chr3R:-:16887401:16890193:Cortactin:<1.2:4	IR	E2,E4	E2,E3,E4	-3.7246	-2.72529	0.999306	0.00545159	0.0560322	0.949428	0.873426	0.0760018
Cp110	FBtr0077352,FBtr0077353,FBtr0100650,FBtr0100651,FBtr0100652,FBtr0310475:chrX:+:21884236:21889294:Cp110::10-12	AFE	E7,E8,E10	E9,E10	0.815037	1.37118	0.556144	0.0144738	0.110078	0.188128	0.285855	-0.0977262
cpo	FBtr0330269,FBtr0330270,FBtr0330271,FBtr0330272,FBtr0330273,FBtr0330274,FBtr0330275,FBtr0330276,FBtr0330277,FBtr0330278,FBtr0330279,FBtr0330280:chr3R:+:13745553:13844614:cpo:17:20.21.22>	ES	E17,E20	E17,E18	0.930475	0.192372	-0.738103	0.0262648	0.155356	0.157521	0.276882	-0.119361
Cpr	FBtr0079250,FBtr0079251,FBtr0331223,FBtr0331224:chr2L:+:6338835:6346280:Cpr::7-8-9-10>	AFE	E4,E5,E7	E6,E7	2.8185	3.4481	0.629598	0.00366576	0.0434589	0.885459	0.932066	-0.0466069
Cpr62Bb	FBtr0072786,FBtr0299562,FBtr0332875:chr3L:-:1832635:1835164:Cpr62Bb:<1:4-5-6-7>	IR	E1,E4	E1,E2,E3,E4	1.28175	0.961057	-0.320694	0.048884	0.223225	0.0906022	0.121853	-0.0312504
cpx	FBtr0078897,FBtr0078898,FBtr0078899,FBtr0078900,FBtr0078901,FBtr0078902,FBtr0100499,FBtr0100500,FBtr0113337,FBtr0113338,FBtr0113339,FBtr0113340,FBtr0113341,FBtr0113343,FBtr0300789,FBtr0301768,FBtr0301769,FBtr0301770,FBtr0301771,FBtr0301772,FBtr0310506,FBtr0310614:chr3R:+:105905:130349:cpx:<22.23.24:27	A5SS	E24,E27	E24,E25,E27	-2.80158	-3.8764	-1.07482	0.0138771	0.107248	0.76577	0.903446	-0.137676
CR42549,mura	FBtr0082116,FBtr0082117,FBtr0082118,FBtr0301176,FBtr0301248,FBtr0301249,FBtr0301250:chr3R:-:5363875:5377528:CR42549,mura:<1:8	ES	E1,E8	E1,E6	-0.315327	-0.933947	-0.61862	0.0193697	0.129877	0.0367618	0.0703643	-0.0336026
CR42861	FBtr0304030,FBtr0304031:chrX:+:13638960:13639509:CR42861:<1:3>	IR	E1,E3	E1,E2,E3	-20	-2.05127	17.9487	0.00201356	0.0290344	1	0.749701	0.250299
CR43283	FBtr0306728,FBtr0306729:chr3R:-:7073824:7081845:CR43283:<1-2:	ALE	E2,E3	E2,E4	-1.29392	-2.87639	-1.58246	0.0265902	0.155611	0.267802	0.0769587	0.190843
CR43480,su(f)	FBtr0113732,FBtr0113733,FBtr0306544,FBtr0306545,FBtr0309314,FBtr0309315,FBtr0309956:chrXHet:+:69141:80249:CR43480,su(f):<11.12-13-14-15:	ALE	E15,E16,E17	E15,E18,E19,E20,E21,E22,E23	-3.272	-2.71472	0.55728	0.0317398	0.172468	0.351118	0.473836	-0.122718
CREG	FBtr0089895,FBtr0089896,FBtr0089897,FBtr0305991:chr3R:-:13218993:13220362:CREG::4.5-6-7>	AFE	E1,E4	E2,E3,E4	0.807923	1.1508	0.342875	0.0592214	0.248268	0.391764	0.3174	0.0743643
Crk	FBtr0089112,FBtr0089113,FBtr0089114,FBtr0304871,FBtr0308256:chr4:+:230882:233791:Crk:<1.2.3-4.5.6:11-12>	ES	E6,E11	E6,E7,E8,E9,E11	-5.28161	-4.44698	0.834628	0.0266707	0.155611	0.963761	0.917232	0.0465292
CRMP	FBtr0089684,FBtr0089685,FBtr0089686,FBtr0114453:chr3R:+:1396829:1404913:CRMP:12:14-15-16>	IR	E12,E14	E12,E13,E14	1.36524	-0.105361	-1.4706	3.67116e-06	0.000342934	0.0321311	0.124853	-0.0927222
CRMP	FBtr0089684,FBtr0089685,FBtr0089686,FBtr0114453:chr3R:+:1396829:1404913:CRMP:10:12	IR	E10,E12	E10,E11,E12	-0.779627	-1.66309	-0.883463	0.0559111	0.241315	0.140724	0.288027	-0.147303
crol	FBtr0080260,FBtr0080261,FBtr0080262,FBtr0080263,FBtr0305262:chr2L:-:11794326:11809433:crol:<1:4	ES	E1,E4	E1,E3	-0.906721	-1.89417	-0.987453	0.00568909	0.0574041	0.430356	0.671242	-0.240886
crol	FBtr0080260,FBtr0080261,FBtr0080262,FBtr0080263,FBtr0305262:chr2L:-:11794326:11809433:crol::3	AFE	E1,E3	E2,E3	-0.721585	-0.347786	0.373799	0.0303003	0.167568	0.397871	0.31082	0.0870518
csw	FBtr0070378,FBtr0070379,FBtr0070380,FBtr0333260:chrX:+:1988266:2009734:csw:<1-3-4-7-8-9-10-11-12-13:15.16>	IR	E13,E15	E13,E14,E15	-1.22389	-0.583224	0.640671	0.0382876	0.195162	0.565162	0.412504	0.152658
CtBP	FBtr0082699,FBtr0082700,FBtr0082701,FBtr0082702,FBtr0100161:chr3R:+:8837387:8851905:CtBP:<1-5-6-7-8-9:12>	ES	E9,E11,E12	E9,E12	0.855203	0.341749	-0.513454	0.0226677	0.142543	0.299323	0.203169	0.0961533
Ctr1A	FBtr0070951,FBtr0308592,FBtr0308593,FBtr0308594:chrX:+:6555679:6562291:Ctr1A:<2:5-6-7	ES	E2,E5	E2,E3,E5	-0.471423	-0.117783	0.35364	0.0516598	0.23017	0.341711	0.273461	0.0682498
cu	FBtr0113218,FBtr0113219,FBtr0113220:chr3R:+:7026137:7034357:cu::5-6-7-8-9>	AFE	E1,E3,E5	E4,E5	2.07443	2.69463	0.620198	0.0395429	0.19877	0.625595	0.758177	-0.132582
cv-c	FBtr0112630,FBtr0112631,FBtr0112632:chr3R:-:10217401:10307410:cv-c::3-4-5-6-7-8-9-10-12-13-14-15-16-17-18>	AFE	E1,E3	E2,E3	1.41829	2.97771	1.55942	0.000476499	0.0108584	0.0615797	0.0124974	0.0490823
cwo	FBtr0082246,FBtr0305151,FBtr0305152:chr3R:+:6213984:6226477:cwo:<1:3	A3SS	E1,E3	E1,E2,E3	0.29523	1.5682	1.27297	0.00586236	0.0580428	0.0673773	0.0226633	0.044714
CYLD	FBtr0080068,FBtr0080069,FBtr0080070,FBtr0080071,FBtr0080072:chr2L:-:10295855:10299827:CYLD::7-8-9-10-11-12	AFE	E1,E3,E4,E5,E7	E6,E7	2.18167	2.72731	0.545636	0.0475219	0.22052	0.824362	0.88672	-0.0623578
d4	FBtr0086082,FBtr0086083,FBtr0111115:chr2R:+:1147483:1183475:d4:<3.4.5-6:8>	A5SS	E6,E8	E6,E7,E8	-1.17351	-1.78415	-0.610641	0.0480842	0.221218	0.743043	0.850051	-0.107008
DAAM	FBtr0070239,FBtr0070241,FBtr0303264,FBtr0310282,FBtr0310283:chrX:-:1183745:1216427:DAAM:<1-2:7-9-10-11-12-13-14-15-16>	ES	E2,E7	E2,E3,E7	-2.55723	-5.0689	-2.51168	0.00143765	0.0230507	0.8746	0.988927	-0.114327
Dad	FBtr0083393,FBtr0083394,FBtr0100160:chr3R:+:12879728:12896135:Dad::4-5-6-7-8-9-10>	AFE	E1,E4	E2,E3,E4	-0.247836	-1.33829	-1.09045	0.00611368	0.0603919	0.755213	0.890443	-0.135231
Dbp80	FBtr0113715,FBtr0113716,FBtr0331780,FBtr0331781,FBtr0331782,FBtr0331783,FBtr0331784:chr3LHet:+:2409851:2545146:Dbp80:7-8-9-11-13:15>	A3SS	E13,E15	E13,E14,E15	-2.8381	-3.79549	-0.957386	0.0477725	0.220899	0.895679	0.955436	-0.0597569
Dgp-1	FBtr0086773,FBtr0086774:chr2R:-:14055917:14060112:Dgp-1::3-4-5-6.7>	AFE	E1,E3	E2,E3	2.63189	3.7495	1.11762	0.00173997	0.0266003	0.136921	0.0493865	0.0875346
Dhc64C	FBtr0073359,FBtr0273370,FBtr0332745,FBtr0332746,FBtr0332747,FBtr0332748,FBtr0332749,FBtr0332750:chr3L:-:4807367:4825687:Dhc64C:10-11:14-15-16>	ME	E11,E12,E14	E11,E13,E14	-0.733039	-1.38138	-0.648342	0.00293022	0.0373637	0.323069	0.205169	0.1179
Dic1	FBtr0082747,FBtr0082748:chr3R:+:9190660:9194813:Dic1::3-4>	AFE	E1,E3	E2,E3	0.973915	0.563112	-0.410803	0.0470362	0.219213	0.458143	0.551867	-0.093724
dikar	FBtr0303748,FBtr0303749,FBtr0303750,FBtr0303751,FBtr0330145,FBtr0333047:chr3L:-:6721899:6736264:dikar:<1-3-4-5-6.7-8:11-12-13-14.15>	A3SS	E8,E10,E11	E8,E11	-0.485508	0.587787	1.07329	0.00822503	0.0747042	0.057287	0.157511	-0.100224
DIP1	FBtr0077371,FBtr0077372,FBtr0077373,FBtr0300373,FBtr0300374,FBtr0301292,FBtr0301293,FBtr0301294:chrX:-:21495822:21501185:DIP1:6:8	IR	E6,E8	E6,E7,E8	-2.05172	-1.19942	0.8523	0.000843453	0.0161081	0.735683	0.548074	0.187609
Dip-B	FBtr0082831,FBtr0082832,FBtr0082833:chr3R:+:9608011:9611401:Dip-B::4-5-6-7>	AFE	E1,E4	E2,E3,E4	2.92316	3.96398	1.04082	0.0427691	0.208935	0.115911	0.0457031	0.0702076
dl	FBtr0081005,FBtr0081006,FBtr0081007,FBtr0301383,FBtr0301384:chr2L:-:17436829:17450360:dl:<2:4	A5SS	E2,E4	E2,E3,E4	0.700918	1.34405	0.643128	0.051643	0.23017	0.0636582	0.0315098	0.0321484
dlg1	FBtr0073483,FBtr0073484,FBtr0073485,FBtr0073486,FBtr0073487,FBtr0073488,FBtr0073489,FBtr0073490,FBtr0073491,FBtr0073492,FBtr0112812,FBtr0112813,FBtr0301288,FBtr0301289,FBtr0302114,FBtr0308088,FBtr0308089,FBtr0330390,FBtr0333261,FBtr0333262,FBtr0333263:chrX:+:11263697:11303809:dlg1::3.4.5.6-8-9	AFE	E1,E3	E2,E3	1.50332	0.70232	-0.800996	0.0516822	0.23017	0.212906	0.367071	-0.154165
dlg1	FBtr0073483,FBtr0073484,FBtr0073485,FBtr0073486,FBtr0073487,FBtr0073488,FBtr0073489,FBtr0073490,FBtr0073491,FBtr0073492,FBtr0112812,FBtr0112813,FBtr0301288,FBtr0301289,FBtr0302114,FBtr0308088,FBtr0308089,FBtr0330390,FBtr0333261,FBtr0333262,FBtr0333263:chrX:+:11263697:11303809:dlg1:32:	ALE	E32,E33	E32,E35,E36,E37,E38,E39,E40,E41	-4.56783	-3.47189	1.09594	0.00297778	0.0376339	0.333962	0.582359	-0.248397
Doa	FBtr0299742,FBtr0299743,FBtr0299744,FBtr0299745,FBtr0299746,FBtr0299747,FBtr0299748,FBtr0299749,FBtr0299750,FBtr0299751,FBtr0299752,FBtr0299753,FBtr0301396,FBtr0308598,FBtr0308599,FBtr0308600:chr3R:+:24713798:24748494:Doa:<1:3	IR	E1,E3	E1,E2,E3	-2.99573	-1.08463	1.91111	0.000479367	0.0108584	0.903108	0.572874	0.330234
Doa	FBtr0299742,FBtr0299743,FBtr0299744,FBtr0299745,FBtr0299746,FBtr0299747,FBtr0299748,FBtr0299749,FBtr0299750,FBtr0299751,FBtr0299752,FBtr0299753,FBtr0301396,FBtr0308598,FBtr0308599,FBtr0308600:chr3R:+:24713798:24748494:Doa:22-23-24-25-26-27-28:30-31.32>	A3SS	E28,E30	E28,E29,E30	1.49664	1.01947	-0.477167	0.0225739	0.142441	0.140262	0.208692	-0.0684302
dp	FBtr0305141,FBtr0305142,FBtr0305145,FBtr0332343,FBtr0332344,FBtr0332345,FBtr0332346,FBtr0332347,FBtr0332348,FBtr0332349,FBtr0332350,FBtr0332351,FBtr0332352,FBtr0332353,FBtr0332354,FBtr0332355:chr2L:-:4477461:4595054:dp::78-79-80-81-82-83-84.85>	AFE	E39,E40,E78	E76,E77,E78	-0.165514	0.583146	0.748661	0.0183755	0.125826	0.771297	0.629319	0.141978
DppIII	FBtr0081840,FBtr0081841:chr3R:+:4170123:4173187:DppIII:<1:3-4>	ES	E1,E3	E1,E2,E3	-0.505936	-1.30716	-0.801221	0.000788416	0.0153295	0.236822	0.408956	-0.172134
Dredd	FBtr0114559,FBtr0114560,FBtr0114561:chrX:-:527552:529760:Dredd:<1-2.3:5-6-7>	IR	E3,E5	E3,E4,E5	-0.826679	-1.26957	-0.442892	0.0461574	0.218982	0.513593	0.611959	-0.098366
Dscam	FBtr0089016,FBtr0089018,FBtr0089019,FBtr0089020,FBtr0111049,FBtr0111050,FBtr0111051,FBtr0111052,FBtr0111053,FBtr0111054,FBtr0111055,FBtr0111056,FBtr0111057,FBtr0111058,FBtr0111059,FBtr0111060,FBtr0111061,FBtr0111062,FBtr0111063,FBtr0111064,FBtr0111065,FBtr0111066,FBtr0111067,FBtr0111068,FBtr0111069,FBtr0111070,FBtr0111071,FBtr0111072,FBtr0111073,FBtr0111074,FBtr0111075,FBtr0111076,FBtr0111077,FBt…	ME	E66,E75,E100	E66,E96,E100	1.16315	-0.139762	-1.30291	0.0217421	0.139441	0.734677	0.470021	0.264656
Dscam	FBtr0089016,FBtr0089018,FBtr0089019,FBtr0089020,FBtr0111049,FBtr0111050,FBtr0111051,FBtr0111052,FBtr0111053,FBtr0111054,FBtr0111055,FBtr0111056,FBtr0111057,FBtr0111058,FBtr0111059,FBtr0111060,FBtr0111061,FBtr0111062,FBtr0111063,FBtr0111064,FBtr0111065,FBtr0111066,FBtr0111067,FBtr0111068,FBtr0111069,FBtr0111070,FBtr0111071,FBtr0111072,FBtr0111073,FBtr0111074,FBtr0111075,FBtr0111076,FBtr0111077,FBt…	ME	E106,E107,E109	E106,E108,E109	0.662463	1.10714	0.444677	0.0272242	0.157091	0.698877	0.791469	-0.0925923
Dys	FBtr0083764,FBtr0083765,FBtr0083766,FBtr0110915,FBtr0110916,FBtr0110917,FBtr0110918,FBtr0110919:chr3R:+:15286809:15421117:Dys:12-13-14-15-16-17-18:21-22-23-24-25	ES	E18,E21	E18,E20,E21	0.644357	-0.523855	-1.16821	1.27943e-05	0.000805249	0.179212	0.406763	-0.227551
Dys	FBtr0083764,FBtr0083765,FBtr0083766,FBtr0110915,FBtr0110916,FBtr0110917,FBtr0110918,FBtr0110919:chr3R:+:15286809:15421117:Dys:5-6-7-8-9-10:12-13-14-15-16-17-18	ES	E10,E12	E10,E11,E12	-1.41099	-0.504556	0.906431	0.000825589	0.0158373	0.157905	0.0684436	0.0894616
E(bx)	FBtr0072521,FBtr0072522,FBtr0072523,FBtr0301348,FBtr0301349,FBtr0332101,FBtr0332102,FBtr0332103,FBtr0332104:chr3L:-:233925:246912:E(bx):3:5-6-7.8-9-10	A5SS	E3,E5	E3,E4,E5	-0.889857	-2.09714	-1.20728	0.0072297	0.0672424	0.563652	0.806414	-0.242762
E(bx)	FBtr0072521,FBtr0072522,FBtr0072523,FBtr0301348,FBtr0301349,FBtr0332101,FBtr0332102,FBtr0332103,FBtr0332104:chr3L:-:233925:246912:E(bx)::17	AFE	E12,E13,E17	E16,E17	5.40717	3.79869	-1.60848	0.00891059	0.0791091	0.978705	0.90175	0.0769548
E23	FBtr0089979,FBtr0089980,FBtr0089981:chr2L:-:3334870:3355000:E23:<1-2:4-6-7-8-9-10-11-12>	IR	E2,E4	E2,E3,E4	-3.29584	-1.72551	1.57033	0.00848961	0.0758417	0.911228	0.668657	0.242571
Eb1	FBtr0086127,FBtr0086129,FBtr0086130,FBtr0086131,FBtr0300285,FBtr0332939:chr2R:+:2636731:2643805:Eb1:<1-5-6:9	ME	E6,E7,E9	E8,E9	-1.68528	-0.990649	0.694627	0.000354516	0.00885673	0.149413	0.260494	-0.111081
ect	FBtr0076305,FBtr0076307,FBtr0301385,FBtr0331551:chr3L:-:10183375:10194937:ect:3-4-5-6:	ALE	E6,E7	E6,E8,E9,E10	0.0382379	-0.345222	-0.38346	2.03534e-05	0.00105372	0.448912	0.360469	0.088443
ect	FBtr0076305,FBtr0076307,FBtr0301385,FBtr0331551:chr3L:-:10183375:10194937:ect::3-4-5-6	AFE	E1,E3	E2,E3	2.19396	2.81247	0.618507	0.0021182	0.0298423	0.138973	0.0843881	0.0545844
Ect4	FBtr0304993,FBtr0304994,FBtr0304995,FBtr0304996,FBtr0304997,FBtr0304998,FBtr0304999,FBtr0333948:chr3L:+:8056973:8101936:Ect4:21:	ALE	E21,E22	E21,E23	-0.47424	0.388585	0.862825	0.0203199	0.133918	0.354563	0.559132	-0.204569
Edem2	FBtr0080438,FBtr0333235:chr2L:+:13192200:13197281:Edem2:<1-2-3-4-5-6:8-9>	A5SS	E6,E8	E6,E7,E8	-1.79868	-2.79321	-0.994528	0.00760073	0.0702373	0.793731	0.911974	-0.118243
EfTuM	FBtr0087670,FBtr0301389:chr2R:+:9395062:9396837:EfTuM:<1.2:4>	IR	E2,E4	E2,E3,E4	0.474603	1.62584	1.15124	4.55123e-09	1.30377e-06	0.225624	0.0837673	0.141857
egh	FBtr0070439,FBtr0070440:chrX:+:2482533:2492638:egh::3-4>	AFE	E1,E3	E2,E3	1.4781	0.283575	-1.19453	0.00135759	0.0221809	0.493625	0.77083	-0.277205
egr	FBtr0088405,FBtr0088406:chr2R:+:5965869:5971715:egr:<1-2-3-4-5:7-8>	A3SS	E5,E7	E5,E6,E7	-1.34744	-2.4676	-1.12016	0.00237902	0.0326602	0.738279	0.89902	-0.160741
Ehbp1	FBtr0087019,FBtr0114627,FBtr0114628,FBtr0114629:chr2R:-:12895410:12903391:Ehbp1:<1.2:4-5-6-7	A5SS	E2,E4	E2,E3,E4	-1.99543e-09	-0.551497	-0.551497	0.032271	0.17377	0.480392	0.617459	-0.137067
eIF-4a	FBtr0079175,FBtr0079176,FBtr0079177,FBtr0079178,FBtr0307068,FBtr0331201:chr2L:+:5981763:5985793:eIF-4a:<1-3-4-5-6:8.9.10.11>	IR	E6,E8	E6,E7,E8	-0.255172	0.0631944	0.318366	2.07735e-07	3.07806e-05	0.274409	0.216321	0.0580887
eIF-4B	FBtr0113678,FBtr0113679,FBtr0113680,FBtr0113681:chr2RHet:+:2901751:2917318:eIF-4B:<1.2-4.5:7>	IR	E5,E7	E5,E6,E7	-3.56463	-2.58367	0.980968	1.25184e-05	0.000802861	0.932331	0.838396	0.0939343
eIF-4E	FBtr0076487,FBtr0076488,FBtr0076489,FBtr0076490,FBtr0076491,FBtr0076492,FBtr0076493,FBtr0333884,FBtr0333885:chr3L:-:9392717:9395560:eIF-4E:<1:11	A3SS	E1,E10,E11	E1,E11	-0.500775	0.157807	0.658582	1.29305e-05	0.000805249	0.0952061	0.166209	-0.0710031
Ela	FBtr0084708,FBtr0084709:chr3R:+:20691072:20692425:Ela:<1:3-4>	IR	E1,E3	E1,E2,E3	-3.80295	-2.79321	1.00974	0.0568351	0.243248	0.952582	0.88345	0.0691322
ema	FBtr0083315,FBtr0100643:chr3R:-:12262601:12267382:ema:<1-2-3-4-5-6-7-8-9:11>	ES	E9,E10,E11	E9,E11	2.22612	1.20301	-1.02311	0.0588603	0.247733	0.65547	0.422175	0.233295
endoA	FBtr0083698,FBtr0083699:chr3R:+:14732331:14736070:endoA:<1:3>	IR	E1,E3	E1,E2,E3	0.907682	0.451162	-0.45652	0.00120941	0.0203002	0.0797909	0.120523	-0.040732
endoB	FBtr0086558,FBtr0086559,FBtr0113097,FBtr0113098:chr2R:-:15194951:15198197:endoB:<1-2:4	ES	E2,E4	E2,E3,E4	-0.693147	-1.36098	-0.667829	0.0530472	0.23411	0.553173	0.685327	-0.132154
Ent1	FBtr0078094,FBtr0078095,FBtr0330651:chr2L:-:355564:357874:Ent1:<1:3	IR	E1,E3	E1,E2,E3	-3.61092	-2.72079	0.890129	0.0168744	0.120648	0.94998	0.883574	0.0664062
ERR	FBtr0076724,FBtr0076725:chr3L:-:8176460:8179771:ERR::3-4>	AFE	E1,E3	E2,E3	-0.0154981	-0.63602	-0.620522	0.0399304	0.199745	0.821091	0.881158	-0.0600663
ewg	FBtr0089441,FBtr0089442,FBtr0100577,FBtr0100578,FBtr0100579,FBtr0100580,FBtr0100581,FBtr0100582,FBtr0308208,FBtr0308209,FBtr0332976,FBtr0332977,FBtr0332978:chrX:-:162541:173751:ewg::4	AFE	E2,E4	E3,E4	1.19392	2.09597	0.902048	0.0412302	0.203639	0.0654421	0.0287133	0.0367288
eya	FBtr0079334,FBtr0079335,FBtr0306113:chr2L:-:6527446:6546972:eya::3-5-6-7>	AFE	E1,E3	E2,E3	0.76214	-0.646627	-1.40877	0.0146874	0.111308	0.469341	0.785218	-0.315877
faf	FBtr0085843,FBtr0085844,FBtr0307547,FBtr0307548,FBtr0307549,FBtr0307550:chr3R:+:27602732:27616403:faf:<1-7-8-9-10-11-12-13-14-15-16-17-18-19-20-21:23	A5SS	E21,E23	E21,E22,E23	-2.29345	-3.45526	-1.16181	0.057868	0.245874	0.883768	0.960674	-0.0769063
Fak56D	FBtr0086542,FBtr0086543,FBtr0086544,FBtr0114605,FBtr0301882,FBtr0301883:chr2R:-:15318163:15324774:Fak56D:3.4:7-8-9-10-11-12-13-14-15-16-17	IR	E4,E7	E4,E5,E6,E7	-2.5611	-3.85015	-1.28905	0.00502759	0.0536068	0.581252	0.871128	-0.289877
fbl6	FBtr0088178,FBtr0088179,FBtr0088180:chr2R:-:7172652:7177253:fbl6:2:4-5-6-7-8-9-10-11>	A5SS	E2,E4	E2,E3,E4	-1.46634	0.46609	1.93243	0.0115553	0.0953406	0.338975	0.077343	0.261632
fbp	FBtr0081321,FBtr0081322:chr2L:-:19761578:19764134:fbp:<1:3-4>	ES	E1,E3	E1,E2,E3	0.0637261	0.778081	0.714354	3.6281e-05	0.00171318	0.275298	0.156718	0.11858
Fer1HCH	FBtr0085631,FBtr0085632,FBtr0085633,FBtr0085634,FBtr0085635,FBtr0306587,FBtr0306588,FBtr0332170:chr3R:-:26211294:26213900:Fer1HCH:<2:7	A5SS	E2,E7	E2,E3,E4,E5,E7	-3.15354	-2.83624	0.317303	0.0211339	0.137595	0.838643	0.790501	0.0481424
Fhos	FBtr0302085,FBtr0302086,FBtr0302583,FBtr0302584,FBtr0306630,FBtr0306631,FBtr0306632,FBtr0333888,FBtr0333889:chr3L:+:8746718:8791819:Fhos:9-10-11-12-13-14-15:17-18-19-20-21-23	ES	E15,E17	E15,E16,E17	-0.847034	-0.277197	0.569837	0.0287451	0.16231	0.129824	0.0778839	0.0519402
Fis1	FBtr0086073,FBtr0273208,FBtr0273209,FBtr0273210,FBtr0273211:chr2R:-:1491091:1492333:Fis1:<1:5-6-7	ES	E1,E5	E1,E3,E5	-2.17998	-2.49261	-0.312626	0.0513532	0.23017	0.786213	0.836497	-0.0502837
Fis1	FBtr0086073,FBtr0273208,FBtr0273209,FBtr0273210,FBtr0273211:chr2R:-:1491091:1492333:Fis1:<1:3	IR	E1,E3	E1,E2,E3	0.963138	1.27811	0.314968	0.0552364	0.240477	0.14889	0.113815	0.0350747
flfl	FBtr0082817,FBtr0114604:chr3R:+:9509679:9519629:flfl:<1-2-3-4-5-6-7:9-10-11>	A3SS	E7,E9	E7,E8,E9	-1.123	-1.92896	-0.805957	0.0166168	0.119203	0.682133	0.829444	-0.14731
Fmr1	FBtr0082196,FBtr0082197,FBtr0082198,FBtr0082199,FBtr0082200,FBtr0301386,FBtr0308123:chr3R:-:5927141:5935843:Fmr1::3-4	AFE	E1,E3	E2,E3	1.03942	0.309188	-0.730235	0.00296466	0.0375786	0.41557	0.5957	-0.18013
foxo	FBtr0082886,FBtr0082887,FBtr0305052:chr3R:+:9882689:9913700:foxo:3.4.5-6-7-8-9-10-11:13-14-15>	A3SS	E11,E13	E11,E12,E13	-1.39433	-2.19067	-0.796341	0.0123557	0.100553	0.717117	0.852971	-0.135853
frac	FBtr0290277,FBtr0301221,FBtr0301222,FBtr0331839,FBtr0331840:chr3L:+:7555709:7562599:frac:4-5-6-7:9-10-11-12-13>	IR	E7,E9	E7,E8,E9	-0.498138	0.103414	0.601552	0.0128101	0.102696	0.114875	0.0662062	0.0486692
fs(1)h	FBtr0071118,FBtr0071119,FBtr0071120,FBtr0071121,FBtr0071122,FBtr0301309,FBtr0333307,FBtr0333308,FBtr0333309:chrX:-:7931968:7955469:fs(1)h:17-18:	ALE	E18,E19,E20	E18,E22,E23,E24,E25,E26,E27	-1.25584	-1.58312	-0.327279	0.0388881	0.197055	0.495247	0.428235	0.0670116
fu12	FBtr0079703,FBtr0079704,FBtr0302160:chr2L:-:8449690:8463990:fu12::4-5>	AFE	E1,E4	E2,E4	2.87639	1.7492	-1.12719	0.0469124	0.218982	0.0441699	0.123624	-0.0794543
Fur2	FBtr0074261,FBtr0074262,FBtr0074263,FBtr0074264,FBtr0074265,FBtr0074266,FBtr0074267,FBtr0301300,FBtr0301301:chrX:+:16267120:16275816:Fur2:8-9-10:12	IR	E10,E12	E10,E11,E12	-2.70805	-1.68256	1.02549	0.00141903	0.0228373	0.859121	0.684926	0.174194
fusl	FBtr0079078,FBtr0079079,FBtr0307037,FBtr0307038,FBtr0307039:chr2L:-:5330469:5338073:fusl:6:	ALE	E6,E7	E6,E8,E9,E10,E11	-3.39002	-4.32413	-0.934109	5.83983e-05	0.00247753	0.59667	0.373553	0.223117
fz2	FBtr0075028,FBtr0075029,FBtr0112890,FBtr0299586,FBtr0330194,FBtr0330195,FBtr0332735:chr3L:-:19134074:19228473:fz2:<1:3-4-5-6	A5SS	E1,E3	E1,E2,E3	-2.48491	-1.53471	0.950192	0.0152677	0.112918	0.695711	0.45553	0.24018
Gad1	FBtr0073275,FBtr0073276,FBtr0073277,FBtr0332980:chr3L:-:4074076:4088744:Gad1:<3:5-6-7-8-9-10-11>	ES	E3,E5	E3,E4,E5	-1.26455	-1.78877	-0.524223	0.0108367	0.0923917	0.536629	0.700648	-0.164018
Gapdh2	FBtr0074112,FBtr0074113,FBtr0332618:chrX:+:15762177:15763694:Gapdh2:<1.2:4>	IR	E2,E4	E2,E3,E4	2.11591	4.23763	2.12173	1.64761e-07	2.62214e-05	0.0456673	0.00619032	0.039477
GATAe	FBtr0083218,FBtr0303260,FBtr0303261:chr3R:+:11834826:11844855:GATAe::4-5-6-7-8>	AFE	E1,E4	E3,E4	-2.56495	-1.55463	1.01032	0.0317	0.172468	0.883599	0.73232	0.151279
Gfat1	FBtr0113687,FBtr0113690,FBtr0113692,FBtr0113694,FBtr0302846,FBtr0302847,FBtr0302848,FBtr0302849,FBtr0302850:chr3RHet:+:2470207:2481648:Gfat1:14:17-18-19>	A3SS	E14,E17	E14,E16	-1.83888	-1.52529	0.313584	0.0300343	0.166942	0.783465	0.721996	0.061469
gish	FBtr0083261,FBtr0083262,FBtr0083263,FBtr0083264,FBtr0083265,FBtr0100331,FBtr0100332,FBtr0100333,FBtr0301304,FBtr0305071,FBtr0305072,FBtr0330041:chr3R:+:12098175:12128443:gish:20-21-22-24:27	ES	E24,E27	E24,E26,E27	-2.09836	-1.70579	0.392566	0.0211957	0.137788	0.729683	0.643954	0.0857291
Gli	FBtr0080765,FBtr0080766,FBtr0080767,FBtr0080768,FBtr0080769:chr2L:-:15756000:15762755:Gli:<1:6-7-8-9-10-11-12>	A5SS	E1,E6	E1,E2,E6	-2.15296	-1.49565	0.657308	0.00194964	0.0283986	0.717581	0.564265	0.153316
GluClalpha	FBtr0083787,FBtr0083788,FBtr0100127,FBtr0100128,FBtr0301378,FBtr0301379,FBtr0301380:chr3R:+:15556680:15601162:GluClalpha:<1-2-3-5-7-8-9-11.12-13:17-18-19.20>	A5SS	E13,E17	E14,E17	-1.20397	0.287682	1.49165	0.0472945	0.21994	0.713084	0.297142	0.415942
Glut1	FBtr0333493,FBtr0333494,FBtr0333495,FBtr0333496,FBtr0333497,FBtr0333498,FBtr0333499,FBtr0333500,FBtr0333501,FBtr0333502,FBtr0333503,FBtr0333504,FBtr0333505,FBtr0333506,FBtr0333507,FBtr0333508,FBtr0333509:chr3L:+:914073:993687:Glut1:17-18-19-20-21:24-25	A3SS	E21,E24	E21,E23,E24	1.31824	0.128617	-1.18962	0.000577039	0.0123977	0.157839	0.385634	-0.227795
Glycogenin	FBtr0089601,FBtr0089602,FBtr0302214,FBtr0308066,FBtr0331928,FBtr0331929:chr2R:+:17087987:17100474:Glycogenin:<1:	ALE	E1,E12,E13	E1,E3,E4,E5	0.312683	0.549691	0.237008	0.00512812	0.0541318	0.608202	0.551442	0.0567606
Gp150	FBtr0071813,FBtr0071814,FBtr0071815,FBtr0071816:chr2R:+:18205166:18216933:Gp150:<2.3:6-8-9-10-11>	IR	E3,E6	E3,E4,E5,E6	-0.305867	-0.07683	0.229037	0.0559343	0.241315	0.258737	0.21468	0.0440568
Gpb5	FBtr0113776,FBtr0113777,FBtr0332975:chr2LHet:+:167214:167979:Gpb5:<1.2.3:5	IR	E3,E5	E3,E4,E5	-2.18122	-0.798508	1.38272	0.00173266	0.0265902	0.790263	0.510858	0.279405
Gpo-1	FBtr0087307,FBtr0087308,FBtr0087309,FBtr0112900:chr2R:-:11745255:11750251:Gpo-1::6-7-8-9-10-11-12>	AFE	E1,E6	E2,E3,E4,E6	0.321174	1.81425	1.49308	0.000584123	0.0124875	0.109766	0.0312657	0.0785005
gpp	FBtr0303787,FBtr0303788,FBtr0303789,FBtr0303790:chr3R:+:2232578:2273729:gpp:<1:3-4-5-6-7-8-9	IR	E1,E3	E1,E2,E3	-0.30466	0.272415	0.577075	0.0136145	0.106394	0.13512	0.0765122	0.0586076
Gprk2	FBtr0085788:chr3R:+:27230970:27283499:Gprk2:<1:3-4-5-6-7-8-9-10-11-12-13>	ES	E1,E3	E1,E2,E3	-2.07944	1.47018	3.54962	3.32764e-08	7.15295e-06	0.792336	0.101944	0.690392
gprs	FBtr0087109,FBtr0331921,FBtr0331922:chr2R:+:12528747:12538455:gprs:3-4-5:7-8-9-10.11>	ES	E5,E7	E5,E6,E7	-1.17007	-0.0645385	1.10553	0.0334916	0.177566	0.647436	0.421914	0.225522
Gs1l	FBtr0077453,FBtr0110812:chr2L:-:4455192:4456822:Gs1l:<1-2:5>	ME	E2,E3,E5	E2,E4,E5	0.720546	1.97554	1.255	1.48704e-05	0.000875316	0.672727	0.878272	-0.205544
Gug	FBtr0076616,FBtr0076618,FBtr0076619,FBtr0305696,FBtr0305697,FBtr0305698,FBtr0305699,FBtr0333048,FBtr0333049:chr3L:+:8443021:8465769:Gug:6-7-8-9:11	A3SS	E9,E10,E11	E9,E11	0.887303	1.48473	0.597431	0.0220049	0.139932	0.690221	0.80602	-0.115799
Gug	FBtr0076616,FBtr0076618,FBtr0076619,FBtr0305696,FBtr0305697,FBtr0305698,FBtr0305699,FBtr0333048,FBtr0333049:chr3L:+:8443021:8465769:Gug:4:6-7-8-9	A5SS	E4,E6	E4,E5,E6	-1.29168	-0.718465	0.573213	0.0343786	0.180034	0.737193	0.596758	0.140435
gw	FBtr0089096,FBtr0089097,FBtr0089100,FBtr0089101,FBtr0310542,FBtr0310543:chr4:-:669666:681234:gw:5-6-7-8-9-10:12-13.14-15.16>	A3SS	E10,E12	E10,E11,E12	-0.564645	-1.01798	-0.453337	0.00252587	0.033812	0.598193	0.699881	-0.101687
GXIVsPLA2	FBtr0075509,FBtr0273189,FBtr0333572:chr3L:+:15948195:15949565:GXIVsPLA2:<1:	ALE	E1,E2	E1,E3,E4	-4.27667	-20	-15.7233	0.0570664	0.243814	0.430183	0	0.430183
haf	FBtr0077875,FBtr0310017,FBtr0310018,FBtr0310019,FBtr0310020:chr2L:+:1555129:1608404:haf:6-7-8-9-10-11-12:14-15.16.17>	A3SS	E12,E14	E12,E13,E14	-1.40148	-2.35138	-0.949891	0.00351406	0.0419716	0.79283	0.910341	-0.117511
ham	FBtr0305620,FBtr0305621,FBtr0332015,FBtr0332016,FBtr0332017:chr2L:-:18762873:18792906:ham:4:6	ES	E4,E6	E4,E5,E6	-3.44113	-2.3807	1.06043	0.0109796	0.093056	0.897455	0.745662	0.151792
Hcf	FBtr0089124,FBtr0089125,FBtr0089126,FBtr0089127,FBtr0307379:chr4:+:380577:395599:Hcf:13-14.15.16:19-20-21>	ES	E16,E19	E16,E17,E18,E19	-3.54246	-4.16712	-0.624664	0.0391206	0.197999	0.790219	0.877154	-0.0869343
HDAC4	FBtr0073798,FBtr0301298,FBtr0301299,FBtr0308576,FBtr0333331,FBtr0333332,FBtr0333333,FBtr0333334:chrX:-:13156719:13179354:HDAC4:7:10-11-12	A3SS	E7,E10	E7,E9,E10	-2.25533	-3.54818	-1.29285	0.0165433	0.118874	0.85556	0.952701	-0.0971409
HDAC6	FBtr0074008,FBtr0074009,FBtr0074010,FBtr0301774,FBtr0307383,FBtr0307384,FBtr0330405:chrX:+:15227342:15234393:HDAC6:14-15:	ALE	E15,E16	E15,E17	-1.5235	-0.831984	0.691512	0.0320101	0.172811	0.480714	0.647095	-0.166381
hebe	FBtr0088486,FBtr0088487,FBtr0088490,FBtr0113061:chr2R:-:5715605:5724147:hebe:<2:5>	A5SS	E2,E5	E2,E3,E5	-0.202735	-0.00764822	0.195086	0.0332764	0.176747	0.430096	0.388418	0.0416774
Hph	FBtr0078780,FBtr0078781,FBtr0078782:chr3R:+:1082762:1094197:Hph::5-6-7-8>	AFE	E1,E5	E3,E4,E5	-0.555418	-1.97543	-1.42001	0.000161606	0.00480933	0.730518	0.917061	-0.186543
HPS4	FBtr0086839,FBtr0086840,FBtr0301264:chr2R:+:13571101:13578327:HPS4::4-5-6-7-8-9>	AFE	E1,E4	E2,E4	1.04455	1.53623	0.491689	0.0304823	0.168012	0.201693	0.129511	0.0721818
Hr4	FBtr0333337,FBtr0333338,FBtr0333339,FBtr0333340,FBtr0333341,FBtr0333342,FBtr0333343,FBtr0333344,FBtr0333345:chrX:+:1835972:1901989:Hr4:<8.9:13	A5SS	E9,E10,E11,E12,E13	E9,E13	0.545703	-0.0952895	-0.640993	0.000786553	0.0153295	0.0570445	0.0265347	0.0305098
Hr78	FBtr0078389,FBtr0078390,FBtr0078391,FBtr0078392,FBtr0303653,FBtr0303654:chr3L:-:21487118:21490594:Hr78:6-7:9-10>	A5SS	E7,E9	E7,E8,E9	-1.54626	-2.10233	-0.556067	0.0283528	0.16097	0.806576	0.886853	-0.0802766
Hrb98DE	FBtr0085298,FBtr0085299,FBtr0085300,FBtr0085301,FBtr0085302,FBtr0085303:chr3R:+:24425555:24431499:Hrb98DE::3	AFE	E1,E3	E2,E3	-0.97431	-0.762767	0.211543	0.000215329	0.00596948	0.729764	0.687895	0.0418688
Hrb98DE	FBtr0085298,FBtr0085299,FBtr0085300,FBtr0085301,FBtr0085302,FBtr0085303:chr3R:+:24425555:24431499:Hrb98DE:4-5-6-7:	ALE	E7,E10	E7,E8,E9	-3.54552	-2.6965	0.84902	0.00264268	0.0347266	0.0872771	0.180027	-0.0927497
hrg	FBtr0086483,FBtr0086484,FBtr0111010,FBtr0330248:chr2R:-:15551423:15557356:hrg:<1-4-5-6-7-8-9:	ALE	E9,E10	E9,E11,E12	-2.30683	-2.93804	-0.631208	0.00674626	0.0645628	0.20953	0.12017	0.0893599
Hsf	FBtr0086782,FBtr0110964,FBtr0110965,FBtr0110966:chr2R:-:14017807:14022136:Hsf:7:9-10>	ES	E7,E9	E7,E8,E9	0.946747	-0.20546	-1.15221	4.49272e-06	0.000396884	0.155609	0.366222	-0.210613
Hsf	FBtr0086782,FBtr0110964,FBtr0110965,FBtr0110966:chr2R:-:14017807:14022136:Hsf:<1-2-3-4-5:7	IR	E5,E7	E5,E6,E7	0.148761	0.71976	0.570999	0.0205434	0.134566	0.257221	0.172912	0.0843083
Hydr1	FBtr0088580,FBtr0300180,FBtr0302496:chr2R:+:5019991:5022958:Hydr1:<1.2:4-5>	ES	E2,E4	E2,E3,E4	-1.22378	4.02043e-09	1.22378	0.0398921	0.199745	0.387901	0.124301	0.263599
Ice2	FBtr0084014,FBtr0084015,FBtr0113258:chr3R:+:16955940:16958442:Ice2:<2:4.5.6.7>	IR	E2,E4	E2,E3,E4	-20	-1.41203	18.588	0.00668101	0.0642244	1	0.625304	0.374696
Ilk	FBtr0078305,FBtr0307160:chr3L:+:21210000:21212340:Ilk:<1:	ALE	E1,E2	E1,E3,E4,E5,E6	-3.40062	-4.05178	-0.651162	0.00241933	0.0328983	0.111051	0.0626252	0.0484254
Imp	FBtr0073413,FBtr0073414,FBtr0073415,FBtr0073416,FBtr0073417,FBtr0073418,FBtr0073419,FBtr0073420,FBtr0301409,FBtr0305149,FBtr0305150:chrX:-:10681901:10716815:Imp:8:14	ES	E8,E13	E8,E14	0.393043	-0.606136	-0.999178	0.0240001	0.147326	0.245275	0.106302	0.138973
iPLA2-VIA	FBtr0076362,FBtr0076363,FBtr0076364,FBtr0076365:chr3L:-:9853316:9857459:iPLA2-VIA:<1:	ALE	E1,E2,E3,E4	E1,E5,E6,E7,E8,E9,E10	-1.13978	-0.507751	0.632032	0.0219619	0.139932	0.705939	0.796669	-0.0907292
Irk2	FBtr0084425,FBtr0084426,FBtr0301859:chr3R:-:19339689:19345167:Irk2::4-5-6-7>	AFE	E1,E2,E4	E3,E4	-1.38629	-0.340326	1.04597	0.00376512	0.0440565	0.0974327	0.264217	-0.166784
Iswi	FBtr0087841,FBtr0087842,FBtr0087843:chr2R:+:8524175:8528133:Iswi:<1:4-5-6-7-8-9>	IR	E1,E4	E1,E2,E3,E4	1.10671	1.88273	0.776022	0.0175842	0.12306	0.0955332	0.0459183	0.0496149
itp	FBtr0290218,FBtr0290219,FBtr0300186,FBtr0300187:chr2R:+:20427464:20446273:itp::4	AFE	E1,E4	E2,E3,E4	0.693147	1.49752	0.804373	0.028659	0.162036	0.462056	0.273742	0.188313
Jafrac2	FBtr0072982,FBtr0072983,FBtr0332112:chr3L:+:3042358:3044174:Jafrac2::4-5-6-7>	AFE	E1,E4	E2,E3,E4	1.04295	0.575823	-0.467126	0.00382507	0.0444225	0.126187	0.187301	-0.0611141
janA	FBtr0085595,FBtr0085596,FBtr0085597:chr3R:-:25864338:25865259:janA:<1.2:5-6-7>	A5SS	E2,E5	E2,E3,E5	-0.417735	-1.03331	-0.615572	0.00948388	0.0835087	0.582653	0.721819	-0.139166
jar	FBtr0084636,FBtr0301367,FBtr0301368,FBtr0301369,FBtr0301370,FBtr0301371:chr3R:-:20078547:20096953:jar:3-4-5-6-7-8-9-10-11-12-13-14:17-18-19-20.21>	ES	E14,E17	E14,E16,E17	2.05573	1.60002	-0.455706	0.0258578	0.154107	0.0621247	0.0966778	-0.0345531
jbug	FBtr0071919,FBtr0301374,FBtr0301375,FBtr0301376,FBtr0301377,FBtr0302116,FBtr0302117,FBtr0302374,FBtr0330233,FBtr0330234:chr2R:-:18604825:18627964:jbug::3-4-5-6-7	AFE	E1,E3	E2,E3	1.04242	1.4472	0.404774	0.0323512	0.173869	0.200147	0.13572	0.0644265
jbug	FBtr0071919,FBtr0301374,FBtr0301375,FBtr0301376,FBtr0301377,FBtr0302116,FBtr0302117,FBtr0302374,FBtr0330233,FBtr0330234:chr2R:-:18604825:18627964:jbug:18-19:	ALE	E19,E20	E19,E21,E22,E23,E24,E25	-2.50647	-2.19327	0.313196	0.0442782	0.213071	0.531991	0.606496	-0.0745052
JTBR	FBtr0072788,FBtr0332876,FBtr0332877:chr3L:-:1802007:1802856:JTBR:<1:3	IR	E1,E3	E1,E2,E3	-1.116	-0.228259	0.887745	0.0142305	0.108805	0.615612	0.422482	0.19313
KdelR	FBtr0080021,FBtr0080022,FBtr0080023:chr2L:+:10426886:10428632:KdelR:2:	ALE	E2,E3	E2,E4,E5	-1.35362	-2.03229	-0.678671	0.00445172	0.049557	0.859633	0.739915	0.119719
kek5	FBtr0074707,FBtr0074708,FBtr0309223,FBtr0309224:chrX:+:19247217:19365947:kek5:3:	ALE	E3,E4	E3,E6	-3.69783	-2.27366	1.42417	0.00106799	0.0192015	0.0386885	0.153105	-0.114417
kek5	FBtr0074707,FBtr0074708,FBtr0309223,FBtr0309224:chrX:+:19247217:19365947:kek5:6:8-9.10>	ES	E6,E8	E6,E7,E8	-1.114	-1.73204	-0.618043	0.0282749	0.160924	0.642048	0.768836	-0.126788
Khc-73	FBtr0087357,FBtr0329955,FBtr0329956,FBtr0329957:chr2R:-:11403282:11419759:Khc-73:14:16	A3SS	E14,E16	E14,E15,E16	-1.44821	-2.44288	-0.994671	0.0577395	0.245874	0.799679	0.917957	-0.118278
kis	FBtr0078144,FBtr0078145,FBtr0299837,FBtr0308253,FBtr0308254,FBtr0308255:chr2L:-:210734:250823:kis:<1-2-3-4-5-6:8-9-11-12	A5SS	E6,E8	E6,E7,E8	0.775607	1.66432	0.888717	0.0205147	0.134566	0.272556	0.116212	0.156345
kis	FBtr0078144,FBtr0078145,FBtr0299837,FBtr0308253,FBtr0308254,FBtr0308255:chr2L:-:210734:250823:kis:8-9-11-12:14	IR	E12,E14	E12,E13,E14	-0.894629	-1.51732	-0.622693	0.0225871	0.142441	0.161389	0.251435	-0.0900455
kkv	FBtr0078798,FBtr0078800,FBtr0301398:chr3R:-:1203814:1218587:kkv:<1-2-3-4-5-6:9-10-11-12.13.14>	ME	E6,E7,E9	E6,E8,E9	2.74084	2.18529	-0.555553	0.00110268	0.0194309	0.939099	0.893512	0.0455867
klar	FBtr0072565,FBtr0110818,FBtr0112807,FBtr0112808,FBtr0333850,FBtr0333851,FBtr0333852:chr3L:-:434088:540589:klar::22-23-24.25>	AFE	E10,E11,E13,E14,E16,E17,E18,E19,E22	E21,E22	3.63622	2.90163	-0.734588	0.0245162	0.148584	0.888096	0.797156	0.0909396
klar	FBtr0072565,FBtr0110818,FBtr0112807,FBtr0112808,FBtr0333850,FBtr0333851,FBtr0333852:chr3L:-:434088:540589:klar:7-8:10-11-13-14-16-17-18-19	ES	E8,E10	E8,E9,E10	-0.71402	-1.39123	-0.677211	0.0317884	0.172468	0.129525	0.226528	-0.0970024
KLHL18	FBtr0082556,FBtr0082557:chr3R:-:7833831:7836152:KLHL18:<1.2:4-5-6>	IR	E2,E4	E2,E3,E4	0.174353	-0.405465	-0.579818	0.0285634	0.161709	0.223344	0.336476	-0.113133
kuz	FBtr0080509,FBtr0080510,FBtr0100660,FBtr0112886,FBtr0301412:chr2L:+:13550140:13638238:kuz:4:7-8-9-10-11-12-13-14	ES	E4,E7	E4,E5,E7	2.19722	-20	-22.1972	3.25228e-10	1.99644e-07	0.0602919	1	-0.939708
kuz	FBtr0080509,FBtr0080510,FBtr0100660,FBtr0112886,FBtr0301412:chr2L:+:13550140:13638238:kuz:<1.2:4	A5SS	E2,E4	E2,E3,E4	-2.19722	-1.68976	0.507464	0.0349099	0.182048	0.711858	0.602165	0.109693
l(1)G0196	FBtr0299522,FBtr0299523,FBtr0299524,FBtr0299525,FBtr0299526:chrX:+:21889015:21909502:l(1)G0196:14-15:	ALE	E15,E16	E15,E17	-1.51198	-0.879249	0.632733	0.0112247	0.093838	0.184294	0.298806	-0.114511
l(2)03709	FBtr0086614,FBtr0086615,FBtr0086616,FBtr0112861,FBtr0112862,FBtr0112863:chr2R:+:14706971:14709755:l(2)03709:3:5-6-7-8-9	IR	E3,E5	E3,E4,E5	0.768133	1.17017	0.402041	7.65961e-05	0.00288714	0.135427	0.0946748	0.0407526
l(2)k09913	FBtr0071958,FBtr0071959,FBtr0071960,FBtr0071961:chr2R:+:18954724:18959404:l(2)k09913:<1.2:5-6	IR	E2,E5	E2,E3,E4,E5	0.467475	1.39759	0.930119	1.1479e-05	0.000770708	0.0761684	0.0317307	0.0444378
l(3)L1231	FBtr0082975,FBtr0304678:chr3R:-:10470390:10481436:l(3)L1231::3-4-5-6-7>	AFE	E1,E3	E2,E3	1.20397	2.00148	0.797507	0.0554823	0.240541	0.686431	0.513862	0.172569
l(3)neo38	FBtr0082533,FBtr0110876,FBtr0110877,FBtr0305186,FBtr0307081,FBtr0307082,FBtr0307083,FBtr0307084,FBtr0307085,FBtr0307086,FBtr0307087,FBtr0330170:chr3R:-:7590759:7604886:l(3)neo38:<2:4.5.6.7-12	A5SS	E2,E4	E2,E3,E4	-0.788457	0.154151	0.942608	0.0233395	0.144835	0.385425	0.195133	0.190293
LanB1	FBtr0079490,FBtr0079491:chr2L:+:7811439:7820771:LanB1::3-4-5-6>	AFE	E1,E3	E2,E3	0.486611	0.0203673	-0.466244	0.00179875	0.0269164	0.863848	0.91427	-0.0504217
lbl	FBtr0084092,FBtr0300061,FBtr0332438:chr3R:-:17235698:17259855:lbl:<1-3-4:6>	IR	E4,E6	E4,E5,E6	-1.11696	0.0606246	1.17759	0.00113622	0.0195293	0.608404	0.316996	0.291407
Lip4	FBtr0080093,FBtr0304119,FBtr0331672:chr2L:+:10527571:10531778:Lip4:<2.3.4-5-6:8>	A5SS	E6,E8	E6,E7,E8	-1.23915	-0.144571	1.09458	0.000597566	0.012649	0.755227	0.508138	0.247089
Liprin-gamma	FBtr0071846,FBtr0071847,FBtr0113106,FBtr0113107:chr2R:-:18221008:18260610:Liprin-gamma:6:8-9-10-11-12-13	ES	E6,E8	E6,E7,E8	-1.73073	-0.632544	1.09818	0.0115221	0.0953406	0.526795	0.279116	0.247679
Lnk	FBtr0084935,FBtr0084936,FBtr0084937:chr3R:+:21714264:21718999:Lnk:4:	ALE	E4,E5	E4,E6,E7,E8	-2.35417	-1.12425	1.22992	6.71547e-05	0.00264737	0.590225	0.83571	-0.245484
loj	FBtr0301446,FBtr0301447,FBtr0301448:chr3L:+:6088086:6089617:loj:<1:4-5-6-7-8>	IR	E1,E4	E1,E2,E3,E4	-1.0229	-0.646355	0.376545	0.00713258	0.0664831	0.484811	0.394801	0.0900096
lok	FBtr0081328,FBtr0081329,FBtr0081330,FBtr0306234:chr2L:+:20061476:20064381:lok:3:5-6-7-9-10>	A5SS	E3,E5	E3,E4,E5	0.549298	1.3708	0.821503	0.0282487	0.160924	0.222674	0.11604	0.106634
lolal	FBtr0086776,FBtr0086777,FBtr0086778,FBtr0086779,FBtr0300483,FBtr0300484,FBtr0305270:chr2R:-:14042349:14045697:lolal::10-11-12>	AFE	E1,E2,E10	E3,E10	1.08564	1.97372	0.888078	7.84261e-06	0.000581029	0.291575	0.498425	-0.20685
LpR1	FBtr0113480,FBtr0301466,FBtr0301467,FBtr0301468,FBtr0301469,FBtr0301470,FBtr0301471,FBtr0333195,FBtr0333196,FBtr0333197:chr3R:-:21567069:21588827:LpR1::10	AFE	E7,E10	E8,E9,E10	-0.782759	-1.59393	-0.811174	0.00288221	0.0373038	0.481906	0.657966	-0.17606
LpR2	FBtr0084927,FBtr0084928,FBtr0113384,FBtr0113385,FBtr0113386,FBtr0113387,FBtr0113388:chr3R:-:21524487:21566187:LpR2:6:9-10	ME	E6,E7,E9	E6,E8,E9	-2.21485	-0.637458	1.57739	2.43126e-09	8.03627e-07	0.100309	0.349634	-0.249325
LpR2	FBtr0084927,FBtr0084928,FBtr0113384,FBtr0113385,FBtr0113386,FBtr0113387,FBtr0113388:chr3R:-:21524487:21566187:LpR2::6	AFE	E1,E2,E3,E6	E5,E6	-0.603232	-1.19497	-0.591733	0.00331229	0.0403198	0.0844785	0.0498713	0.0346072
LpR2	FBtr0084927,FBtr0084928,FBtr0113384,FBtr0113385,FBtr0113386,FBtr0113387,FBtr0113388:chr3R:-:21524487:21566187:LpR2:11:13-14-15>	ES	E11,E13	E11,E12,E13	-0.449525	0.179971	0.629496	0.0212667	0.13804	0.331206	0.23656	0.0946459
Lrch	FBtr0080968,FBtr0080969:chr2L:-:17367508:17384147:Lrch:<1-2-3-4-5-6:	ALE	E6,E7	E6,E8	-0.940388	-1.64223	-0.701839	0.0266764	0.155611	0.263607	0.147788	0.115819
lt	FBtr0111123,FBtr0111124,FBtr0111125,FBtr0333518,FBtr0333519:chr2L:+:22811943:22834955:lt:6-7-8-9:12-13-14-15.16.17>	ES	E9,E10,E11,E12	E9,E12	2.57709	4.3169	1.73981	0.000473415	0.0108584	0.563317	0.880282	-0.316965
mbf1	FBtr0075393,FBtr0075394,FBtr0305569,FBtr0305570,FBtr0330137:chr3L:+:16567535:16569971:mbf1:<1-2.3:5-6-7.8>	IR	E3,E5	E3,E4,E5	-0.257871	0.594111	0.851982	5.88402e-05	0.00247753	0.298895	0.156847	0.142049
Mbs	FBtr0075441,FBtr0112850,FBtr0112851,FBtr0112852,FBtr0301472,FBtr0301473,FBtr0301575,FBtr0308212,FBtr0308213,FBtr0308214,FBtr0308215,FBtr0308216,FBtr0333616:chr3L:+:16045058:16075126:Mbs::28-29	AFE	E21,E22,E23,E24,E28	E25,E26,E27,E28	1.31884	1.06475	-0.254087	0.0146505	0.111225	0.152072	0.189803	-0.0377303
Mbs	FBtr0075441,FBtr0112850,FBtr0112851,FBtr0112852,FBtr0301472,FBtr0301473,FBtr0301575,FBtr0308212,FBtr0308213,FBtr0308214,FBtr0308215,FBtr0308216,FBtr0333616:chr3L:+:16045058:16075126:Mbs:2:4	A3SS	E2,E4	E2,E3	1.06087	2.42037	1.3595	0.0288543	0.162713	0.0551183	0.0139086	0.0412097
Mbs	FBtr0075441,FBtr0112850,FBtr0112851,FBtr0112852,FBtr0301472,FBtr0301473,FBtr0301575,FBtr0308212,FBtr0308213,FBtr0308214,FBtr0308215,FBtr0308216,FBtr0333616:chr3L:+:16045058:16075126:Mbs:19:21-22-23-24	ES	E19,E21	E19,E20,E21	-0.996097	-0.615186	0.380911	0.0571957	0.244061	0.136277	0.0936285	0.0426487
mdy	FBtr0080915,FBtr0080916,FBtr0080917,FBtr0080918:chr2L:+:16816659:16826964:mdy:<1:5-6-7-8-9-10-11-12-13>	A5SS	E1,E5	E1,E2,E5	-2.11254	1.15566	3.26821	6.38657e-06	0.000511179	0.787683	0.129494	0.658189
MED31,slx1	FBtr0078856,FBtr0078857,FBtr0301296,FBtr0305312:chr3R:+:467695:470358:MED31,slx1:<1:3	IR	E1,E3	E1,E2,E3	0.221056	-0.298219	-0.519276	0.0219976	0.139932	0.108699	0.172626	-0.0639275
mei-P26	FBtr0071303,FBtr0333473,FBtr0333474,FBtr0333475:chrX:+:9057287:9083342:mei-P26:6-7:9-10-11-12.13>	A3SS	E7,E9	E7,E8,E9	-0.819441	-1.83828	-1.01884	0.027236	0.157091	0.561902	0.756157	-0.194255
mei-W68,par-1	FBtr0086450,FBtr0086457,FBtr0086461,FBtr0100390,FBtr0100393,FBtr0301503,FBtr0301504,FBtr0301505,FBtr0301506,FBtr0330243,FBtr0330244,FBtr0330245:chr2R:+:15343678:15373191:mei-W68,par-1:22-23-24:27	A3SS	E24,E27	E24,E26,E27	0.805476	1.34993	0.54445	0.00154082	0.0239887	0.246921	0.160359	0.0865616
melt	FBtr0100141,FBtr0302044,FBtr0333373:chr3L:+:7127615:7136174:melt:3-4-5:7-8-9.10-11-12-13>	A3SS	E5,E7	E5,E6,E7	-1.38629	-2.99573	-1.60944	0.0264746	0.155412	0.78134	0.938479	-0.157139
Men	FBtr0082660,FBtr0082661,FBtr0330025:chr3R:-:8538824:8548267:Men::3.4-5-6>	AFE	E1,E3	E2,E3	-1.5293	-2.64113	-1.11183	0.0114475	0.0949612	0.92177	0.971164	-0.0493944
MESK2	FBtr0089703,FBtr0089704,FBtr0089705,FBtr0089706,FBtr0089707,FBtr0089708,FBtr0089709,FBtr0089710,FBtr0089711:chr2R:+:17389601:17404746:MESK2:7-8-9-10:	ALE	E10,E12	E10,E13	-1.95826	-1.22291	0.735346	0.00706751	0.0661636	0.627998	0.780394	-0.152396
MESK2	FBtr0089703,FBtr0089704,FBtr0089705,FBtr0089706,FBtr0089707,FBtr0089708,FBtr0089709,FBtr0089710,FBtr0089711:chr2R:+:17389601:17404746:MESK2:<1:4	A3SS	E1,E4	E1,E3,E4	-0.453917	0.0208341	0.474752	0.0429412	0.209442	0.507572	0.387835	0.119737
Mf	FBtr0083030,FBtr0083031,FBtr0083032,FBtr0083033,FBtr0083034,FBtr0302142,FBtr0302143,FBtr0302144,FBtr0302145,FBtr0302146,FBtr0306642,FBtr0306643,FBtr0306644:chr3R:-:10996346:11006143:Mf:16:	ALE	E16,E17	E16,E18	-1.693	-1.16484	0.528162	0.00291434	0.0373637	0.448536	0.574705	-0.126169
MFS17	FBtr0301779,FBtr0301780,FBtr0301781:chr2RHet:-:1265403:1336014:MFS17:<1:3	ES	E1,E3	E1,E2,E3	0.219363	1.32442	1.10506	0.000604085	0.0127243	0.126351	0.0459367	0.0804144
Mhcl	FBtr0083229,FBtr0083231,FBtr0083232,FBtr0083233,FBtr0110973,FBtr0110974,FBtr0303845,FBtr0332439:chr3R:-:11894244:11924483:Mhcl::18-19	AFE	E15,E16,E17,E18	E6,E7,E8,E9,E10,E11,E13,E14,E18	-2.12941	-1.12599	1.00342	2.94909e-05	0.00146398	0.157785	0.353057	-0.195271
Mhcl	FBtr0083229,FBtr0083231,FBtr0083232,FBtr0083233,FBtr0110973,FBtr0110974,FBtr0303845,FBtr0332439:chr3R:-:11894244:11924483:Mhcl::21-22-23	AFE	E18,E19,E21	E20,E21	2.1081	2.81341	0.705314	0.0137885	0.107044	0.796775	0.889832	-0.0930572
mip120	FBtr0087669,FBtr0301388:chr2R:+:9393946:9400617:mip120::3-4-5-6>	AFE	E1,E3	E2,E3	-0.0896122	0.916291	1.0059	0.0106131	0.090665	0.780065	0.565565	0.2145
mmy	FBtr0079268,FBtr0079269:chr2L:-:6468537:6473919:mmy::3-4>	AFE	E1,E3	E2,E3	-1.1924	-1.99218	-0.799776	0.00146726	0.023438	0.89732	0.948374	-0.0510541
Mnt	FBtr0070578,FBtr0070579,FBtr0301821,FBtr0301822,FBtr0301823,FBtr0301824,FBtr0301825,FBtr0307277,FBtr0307278:chrX:+:3565833:3597318:Mnt:10-11-12:14	A3SS	E12,E14	E12,E13,E14	-0.450586	-1.0245	-0.573919	0.0319825	0.172811	0.596585	0.728665	-0.132079
mor	FBtr0083238,FBtr0302550:chr3R:-:11793855:11798636:mor:<1-2-3-4-5-6:8-9>	A3SS	E6,E8	E6,E7,E8	-2.49189	-3.17679	-0.684899	0.00827849	0.0747325	0.710048	0.830147	-0.120099
mp	FBtr0301105,FBtr0301106,FBtr0301107,FBtr0301108,FBtr0301109,FBtr0301110,FBtr0301111,FBtr0301113,FBtr0301114,FBtr0301958,FBtr0306638,FBtr0308094,FBtr0309957:chr3L:+:6991942:7046528:mp:<1:3	A5SS	E1,E3	E2,E3	-3.38439	-0.488353	2.89604	1.74359e-05	0.00094838	0.962264	0.521077	0.441187
mp	FBtr0301105,FBtr0301106,FBtr0301107,FBtr0301108,FBtr0301109,FBtr0301110,FBtr0301111,FBtr0301113,FBtr0301114,FBtr0301958,FBtr0306638,FBtr0308094,FBtr0309957:chr3L:+:6991942:7046528:mp:2:4-5-6.7-10	A3SS	E2,E4	E2,E3	-1.51259	-0.739667	0.772921	0.053298	0.23436	0.798189	0.655916	0.142273
mp	FBtr0301105,FBtr0301106,FBtr0301107,FBtr0301108,FBtr0301109,FBtr0301110,FBtr0301111,FBtr0301113,FBtr0301114,FBtr0301958,FBtr0306638,FBtr0308094,FBtr0309957:chr3L:+:6991942:7046528:mp::11-12	AFE	E4,E5,E6,E7,E10,E11	E8,E9,E11	2.50767	1.88143	-0.626249	0.0589832	0.247995	0.951662	0.913859	0.0378028
mrj	FBtr0087193,FBtr0087194,FBtr0087195,FBtr0087196,FBtr0113084,FBtr0306652,FBtr0306653,FBtr0332855:chr2R:-:12090833:12109298:mrj:<3:8-9-13-14-15>	ES	E3,E8	E3,E7,E8	0.168335	0.630905	0.46257	0.0525816	0.233412	0.282857	0.198103	0.0847536
mRpL23	FBtr0072900,FBtr0289966,FBtr0331415,FBtr0331416:chr3L:-:2372843:2373704:mRpL23::5-6>	AFE	E2,E3,E5	E4,E5	-1.6748	-2.8657	-1.1909	0.000765823	0.0151647	0.115767	0.0385713	0.0771954
MSBP	FBtr0074166,FBtr0301598,FBtr0333719:chrX:-:15781599:15784149:MSBP:<2:4	IR	E2,E4	E2,E3,E4	-1.67769	-1.04658	0.631112	0.00119009	0.0201331	0.694174	0.555588	0.138586
MSBP	FBtr0074166,FBtr0301598,FBtr0333719:chrX:-:15781599:15784149:MSBP:4:6-7-8>	A3SS	E4,E6	E4,E5,E6	2.07646	1.57033	-0.506134	0.0137138	0.106948	0.0874358	0.136009	-0.0485735
msl-2	FBtr0077570,FBtr0077571:chr2L:-:3462212:3466111:msl-2:<1:3-4>	IR	E1,E3	E1,E2,E3	-0.679902	-1.51413	-0.834226	0.0257324	0.154	0.350161	0.538429	-0.188268
msn	FBtr0072956,FBtr0072957,FBtr0072958,FBtr0072959,FBtr0333362,FBtr0333363,FBtr0333364,FBtr0333365:chr3L:-:2554846:2586540:msn:<1.2:	ALE	E2,E3	E2,E5,E6,E7,E8,E9,E10,E11,E12	-1.78507	-2.71963	-0.934563	1.70765e-09	6.29143e-07	0.661385	0.435339	0.226046
msn	FBtr0072956,FBtr0072957,FBtr0072958,FBtr0072959,FBtr0333362,FBtr0333363,FBtr0333364,FBtr0333365:chr3L:-:2554846:2586540:msn:17:19.20-21-22-23-24.25-26-27.28>	A3SS	E17,E19	E17,E18,E19	-0.259511	-0.649345	-0.389833	0.004593	0.0507356	0.134106	0.188889	-0.0547827
msn	FBtr0072956,FBtr0072957,FBtr0072958,FBtr0072959,FBtr0333362,FBtr0333363,FBtr0333364,FBtr0333365:chr3L:-:2554846:2586540:msn:14-15:17	ES	E15,E17	E15,E16,E17	0.388105	-0.771559	-1.15966	0.0131901	0.104571	0.034336	0.104382	-0.0700463
mtacp1	FBtr0072676,FBtr0072677,FBtr0331864:chr3L:+:1329948:1331631:mtacp1:<1-2:6.7>	ME	E2,E3,E4,E6	E2,E5,E6	-0.304448	-0.455509	-0.151062	0.00260255	0.0345159	0.465081	0.428543	0.036538
mtd	FBtr0078810,FBtr0078811,FBtr0078812,FBtr0078813,FBtr0078814,FBtr0078815,FBtr0078816,FBtr0078817,FBtr0078818,FBtr0100197,FBtr0100199,FBtr0110932,FBtr0110933,FBtr0273430,FBtr0273431,FBtr0273432,FBtr0273433,FBtr0273434,FBtr0306694,FBtr0306695,FBtr0308580,FBtr0308581,FBtr0333694,FBtr0333695:chr3R:-:1095837:1176165:mtd:10:	ALE	E10,E11	E10,E12,E13,E14	-3.43399	-4.99496	-1.56097	0.00435857	0.0490282	0.128739	0.0319003	0.0968389
mtd	FBtr0078810,FBtr0078811,FBtr0078812,FBtr0078813,FBtr0078814,FBtr0078815,FBtr0078816,FBtr0078817,FBtr0078818,FBtr0100197,FBtr0100199,FBtr0110932,FBtr0110933,FBtr0273430,FBtr0273431,FBtr0273432,FBtr0273433,FBtr0273434,FBtr0306694,FBtr0306695,FBtr0308580,FBtr0308581,FBtr0333694,FBtr0333695:chr3R:-:1095837:1176165:mtd:12-13-14:23-25	ES	E14,E23	E14,E22	-2.02095	-1.03302	0.98793	0.0171056	0.121105	0.753815	0.531161	0.222654
mtd	FBtr0078810,FBtr0078811,FBtr0078812,FBtr0078813,FBtr0078814,FBtr0078815,FBtr0078816,FBtr0078817,FBtr0078818,FBtr0100197,FBtr0100199,FBtr0110932,FBtr0110933,FBtr0273430,FBtr0273431,FBtr0273432,FBtr0273433,FBtr0273434,FBtr0306694,FBtr0306695,FBtr0308580,FBtr0308581,FBtr0333694,FBtr0333695:chr3R:-:1095837:1176165:mtd:27.28-29-30:32-33	A3SS	E30,E32	E30,E31,E32	-1.00247	-0.435318	0.56715	0.00371027	0.0436795	0.640409	0.511345	0.129063
na	FBtr0112815,FBtr0303764:chrX:+:14160399:14171207:na:<1-2-3-4-5-6-7:9-10-11	A3SS	E7,E9	E7,E8,E9	-1.04145	0.318454	1.35991	0.0184832	0.125867	0.632978	0.330615	0.302363
NaCP60E	FBtr0308342,FBtr0308343,FBtr0308344,FBtr0308345,FBtr0308346,FBtr0308347,FBtr0330240,FBtr0333815,FBtr0333816,FBtr0333817:chr2R:+:20779162:20809200:NaCP60E::8-9-11-12-13-14-15-16-17-21-22-23-24-25-27-29-31-32-34-35-36-39.40.41-42.43.44>	AFE	E6,E8	E7,E8	0.619039	-1.09861	-1.71765	0.0519296	0.230995	0.663833	0.860538	-0.196705
nahoda	FBtr0071942,FBtr0071943,FBtr0304795:chr2R:+:18783695:18804242:nahoda:<1:3-4-5-6-7-8-9-10-11	A5SS	E1,E3	E1,E2,E3	-2.81975	-1.73384	1.08592	0.00106584	0.0192015	0.633958	0.349017	0.284941
Nc73EF	FBtr0075263,FBtr0075264,FBtr0075266,FBtr0075267,FBtr0075268,FBtr0075269,FBtr0112860,FBtr0333214:chr3L:+:16948034:16961824:Nc73EF:9-10-11:14-15-16-17-18	ME	E11,E12,E14	E11,E13,E14	-0.414701	-0.867738	-0.453036	4.20366e-06	0.000384322	0.359387	0.265757	0.0936298
Nc73EF	FBtr0075263,FBtr0075264,FBtr0075266,FBtr0075267,FBtr0075268,FBtr0075269,FBtr0112860,FBtr0333214:chr3L:+:16948034:16961824:Nc73EF:<7:9-10-11	A5SS	E7,E9	E7,E8,E9	-3.97029	-2.62674	1.34356	0.00150368	0.0237623	0.973249	0.906283	0.0669656
Ncc69	FBtr0075987,FBtr0333838,FBtr0333839,FBtr0333840,FBtr0333841,FBtr0333842:chr3L:-:12361745:12384544:Ncc69:4-5-6-7-8-9-10-11-12-13-14-15:18-19-20-21>	ES	E15,E18	E16,E18	-1.29392	-0.852777	0.441144	0.054065	0.236335	0.622238	0.512757	0.10948
Nckx30C	FBtr0079926,FBtr0079928,FBtr0303908,FBtr0303909:chr2L:-:9712582:9746483:Nckx30C:10:12-13-14.15>	ES	E10,E12	E10,E11,E12	1.83323	-0.736934	-2.57016	0.000720539	0.014468	0.08393	0.470457	-0.386527
nemy	FBtr0087867,FBtr0087868,FBtr0087869,FBtr0087870,FBtr0302150,FBtr0302151:chr2R:-:8547001:8557722:nemy::9-10-11-12.13>	AFE	E1,E2,E9	E7,E9	1.19285	1.85468	0.661834	6.42393e-06	0.000511179	0.625185	0.762901	-0.137716
Nf1	FBtr0084952,FBtr0084953,FBtr0100113,FBtr0330182,FBtr0330183:chr3R:+:21808734:21821459:Nf1:<1-2-3-4-5-6-7-8-9-10-11-12-13:15-16-17	ES	E13,E15	E13,E14,E15	-1.14101	-2.31679	-1.17578	0.0307225	0.16869	0.565982	0.783157	-0.217175
Nhe2	FBtr0081466,FBtr0081467,FBtr0299908,FBtr0299909,FBtr0299910,FBtr0299911,FBtr0299912,FBtr0306015,FBtr0306016:chr2L:+:21104598:21134255:Nhe2:3-4-5-6-7-8-9-10-11-14:16-17-18-19	A5SS	E14,E16	E14,E15,E16	-1.02196	0.0107902	1.03275	0.0260754	0.154974	0.641721	0.427134	0.214587
NijA	FBtr0089569,FBtr0089570,FBtr0089571,FBtr0331575:chr3L:-:10687456:10689977:NijA:<1:3	A5SS	E1,E3	E1,E2,E3	-0.191055	0.875469	1.06652	0.0271889	0.157091	0.523196	0.253132	0.270065
Nipsnap	FBtr0074257,FBtr0074258,FBtr0074259,FBtr0310318:chrX:-:15964397:15967599:Nipsnap:<3.4.5:7-8-9-10-11>	A3SS	E5,E7	E5,E6,E7	-1.44186	-0.71295	0.728914	0.00245606	0.0331877	0.692449	0.528827	0.163622
NKAIN	FBtr0301847,FBtr0301848,FBtr0301849,FBtr0301850,FBtr0301851,FBtr0305056:chr2R:+:20769074:20776138:NKAIN:10:12>	A5SS	E10,E12	E10,E11,E12	-2.18432	-1.83011	0.354212	0.0588553	0.247733	0.637616	0.552192	0.0854238
Nmda1	FBtr0089873,FBtr0089874,FBtr0089875,FBtr0089876,FBtr0089877,FBtr0089878,FBtr0309294,FBtr0309295,FBtr0332883:chr2R:-:8764598:8767735:Nmda1:<2:8	A3SS	E2,E8	E6,E7,E8	-0.993654	-0.0794512	0.914203	0.013144	0.104399	0.510885	0.306695	0.20419
nompA	FBtr0089379,FBtr0089380,FBtr0089381,FBtr0089382,FBtr0301453:chr2R:-:7197952:7206180:nompA:14-15-17-18-19-20-21-22:24>	A5SS	E22,E24	E22,E23,E24	-0.628609	0.339868	0.968476	1.54166e-05	0.000883269	0.456933	0.238344	0.218589
nonA	FBtr0074232,FBtr0074233,FBtr0100586:chrX:+:16255565:16265580:nonA:<1-2-3-4:	ALE	E4,E6	E4,E7	2.4987	1.39303	-1.10567	0.00282327	0.0367624	0.637468	0.365713	0.271755
Npc1a	FBtr0079957,FBtr0303905,FBtr0303906,FBtr0303907:chr2L:-:10213891:10220957:Npc1a:3:5-6-7-8-9-10-11-12-13-14-15>	A5SS	E3,E5	E3,E4,E5	-2.49496	-3.9013	-1.40634	0.000145815	0.00457348	0.809583	0.939455	-0.129872
Npc2b	FBtr0082888,FBtr0082889:chr3R:+:9915244:9918147:Npc2b::3-4>	AFE	E1,E3	E2,E3	-0.835059	-0.364893	0.470166	0.0202628	0.133918	0.623096	0.510474	0.112622
nrv3	FBtr0081518,FBtr0081519,FBtr0081520,FBtr0081521,FBtr0333355:chr2L:+:21379999:21393319:nrv3:<2:6.7-8-9-11-12-13-14.15.16>	A5SS	E2,E6	E2,E3,E6	0.616524	0.245415	-0.371109	0.0486094	0.222554	0.135814	0.18424	-0.0484262
NT1	FBtr0301517,FBtr0301518,FBtr0301519,FBtr0301520,FBtr0301608,FBtr0333586,FBtr0333587:chr3L:-:4501651:4508433:NT1:4-5:	ALE	E5,E6	E5,E7,E8,E9	-1.51593	-1.04343	0.472508	0.00075676	0.0150546	0.61332	0.7095	-0.0961792
NTPase	FBtr0077680,FBtr0077682,FBtr0077683,FBtr0332459,FBtr0332460:chr2L:-:2880703:2885850:NTPase:<3:5	IR	E3,E5	E3,E4,E5	-0.358069	-0.978124	-0.620055	0.0129643	0.103225	0.341181	0.500883	-0.159702
nuf	FBtr0100039,FBtr0100040,FBtr0100041,FBtr0100042,FBtr0100043,FBtr0100044,FBtr0306619,FBtr0306620,FBtr0306622,FBtr0306623,FBtr0306624,FBtr0307191:chr3L:+:14183969:14226350:nuf:<8:10-11	ES	E8,E10	E8,E9,E10	1.22723	-0.362906	-1.59014	0.000104393	0.00364696	0.0401039	0.170605	-0.130501
Nup98-96	FBtr0084460,FBtr0304567:chr3R:-:19599946:19607366:Nup98-96:<1.2-3-4-5:	ALE	E5,E6	E5,E7,E8,E9,E10,E11	-3.45316	-4.67516	-1.22201	0.017728	0.12306	0.249241	0.0985849	0.150656
nwk	FBtr0309276,FBtr0309277,FBtr0309278,FBtr0309280,FBtr0331857:chr3L:+:9130959:9138793:nwk:13-14:16	IR	E14,E16	E14,E15,E16	-3.78797	-2.79535	0.992616	0.0429977	0.20948	0.946475	0.875531	0.0709442
nwk	FBtr0309276,FBtr0309277,FBtr0309278,FBtr0309280,FBtr0331857:chr3L:+:9130959:9138793:nwk:16:18>	IR	E16,E18	E16,E17,E18	-3.65042	-2.80434	0.846086	0.055718	0.240866	0.944586	0.878867	0.0657189
opm	FBtr0073968,FBtr0073969:chrX:-:14959474:14960419:opm::3>	AFE	E1,E3	E2,E3	1.13498	3.4012	2.26622	0.00825797	0.0747042	0.273115	0.0318841	0.241231
Osi19	FBtr0081707,FBtr0301493:chr3R:+:2161085:2162918:Osi19:<1-2:4-5>	A5SS	E2,E4	E2,E3,E4	-0.74353	-0.590302	0.153229	0.0212999	0.138048	0.575494	0.54085	0.0346447
otp	FBtr0110772,FBtr0290289:chr2R:-:16771115:16790900:otp:6-7:9-10>	ES	E7,E9	E7,E8,E9	0.709436	0.0442365	-0.665199	0.0478042	0.220899	0.123658	0.21206	-0.088402
pAbp	FBtr0086736,FBtr0086738,FBtr0086740:chr2R:+:14027582:14034696:pAbp::4-5-6-7.8.9>	AFE	E2,E4	E3,E4	0.585542	1.00806	0.422515	0.0298124	0.165938	0.54745	0.442241	0.105209
Pak	FBtr0081714,FBtr0081715,FBtr0081716,FBtr0114607:chr3R:+:2176619:2185974:Pak:<2:5-6-7-8	A5SS	E2,E5	E2,E3,E5	-0.462624	0.307154	0.769778	0.00086973	0.0165364	0.149259	0.0753574	0.0739018
pallidin	FBtr0300097,FBtr0300726:chr3L:-:11682730:11684499:pallidin:<1-2:4-5-6>	IR	E2,E4	E2,E3,E4	0.490623	1.22378	0.733153	0.0320124	0.172811	0.219554	0.118702	0.100852
pbl	FBtr0076771,FBtr0076772,FBtr0076773,FBtr0076774,FBtr0112817,FBtr0306647:chr3L:-:7889208:7905051:pbl::5-6-7	AFE	E1,E3,E5	E4,E5	-0.0219789	0.71562	0.737599	0.0378934	0.193613	0.327218	0.501597	-0.174379
Pcf11	FBtr0301513,FBtr0302109,FBtr0302294,FBtr0302560:chr2R:-:10748660:10758575:Pcf11:<1-2:	ALE	E2,E3	E2,E4,E5,E6,E7	-2.04291	-1.65935	0.383555	0.0562109	0.241736	0.30231	0.393578	-0.0912686
Pde11	FBtr0112544,FBtr0112545,FBtr0303162,FBtr0303163:chr2L:-:18532727:18571648:Pde11::5-6-7-8-9-10-11-12-13-14-15-16-17-18-19	AFE	E1,E2,E5	E3,E4,E5	0.287682	1.45529	1.16761	0.0108627	0.09243	0.293636	0.117604	0.176032
Pde8	FBtr0072074,FBtr0072075,FBtr0072076,FBtr0072077,FBtr0072078,FBtr0302125,FBtr0302126,FBtr0302127,FBtr0302128,FBtr0302129,FBtr0302130,FBtr0302131,FBtr0302132,FBtr0330242:chr2R:+:19545093:19568367:Pde8:<6.7:	ALE	E7,E11	E7,E8	0.628609	1.75254	1.12393	0.00584396	0.0579942	0.620654	0.796857	-0.176202
Pdp1	FBtr0076775,FBtr0076776,FBtr0076777,FBtr0076780,FBtr0076782,FBtr0300499,FBtr0300500,FBtr0306535,FBtr0332080,FBtr0332081,FBtr0332082,FBtr0332083:chr3L:-:7805014:7860469:Pdp1:14:17-18.19>	A3SS	E14,E17	E14,E16,E17	-3.7595	-3.24705	0.51245	0.0135804	0.106394	0.928555	0.887282	0.0412731
Pdp1	FBtr0076775,FBtr0076776,FBtr0076777,FBtr0076780,FBtr0076782,FBtr0300499,FBtr0300500,FBtr0306535,FBtr0332080,FBtr0332081,FBtr0332082,FBtr0332083:chr3L:-:7805014:7860469:Pdp1:<2:4	IR	E2,E4	E2,E3,E4	-2.00976	-0.76214	1.24762	0.0170398	0.121057	0.241314	0.117132	0.124182
Pdsw	FBtr0077520,FBtr0077521:chr2L:+:3466161:3467326:Pdsw::3-4-5>	AFE	E1,E3	E2,E3	0.911651	1.29151	0.379856	0.0161486	0.117391	0.26625	0.199489	0.0667612
Pep	FBtr0075198,FBtr0075199,FBtr0075200,FBtr0304977:chr3L:-:17631217:17638136:Pep:<1.2:4.5	ES	E2,E4	E2,E3,E4	-0.492642	-0.035948	0.456694	0.000614203	0.0128183	0.347684	0.257965	0.0897187
Pep	FBtr0075198,FBtr0075199,FBtr0075200,FBtr0304977:chr3L:-:17631217:17638136:Pep:4.5:7>	ES	E5,E7	E5,E6,E7	-3.25885	-2.37969	0.879161	0.0193743	0.129877	0.82599	0.657047	0.168943
Pex3	FBtr0075640,FBtr0331830:chr3L:+:15137454:15139479:Pex3:<1:3.4>	A5SS	E1,E3	E1,E2,E3	0.0439631	-1.48539	-1.52935	8.1558e-06	0.000593991	0.423494	0.772911	-0.349417
Pfk	FBtr0088420,FBtr0088421,FBtr0088422,FBtr0304925,FBtr0333067:chr2R:+:5997244:6004962:Pfk:<6.7-8-9:13-14-15-16.17>	ME	E9,E11,E13	E9,E12,E13	-0.563388	-0.195494	0.367894	0.0150096	0.111838	0.362173	0.450814	-0.088641
pgant5	FBtr0079026,FBtr0111024:chr2L:-:5072169:5093592:pgant5:<1:3-4-5-6	ES	E1,E3	E1,E2,E3	-1.16179	-2.13351	-0.971718	0.00185911	0.0273582	0.676242	0.849325	-0.173082
PGRP-LD,Pmi	FBtr0091709,FBtr0091710,FBtr0091711,FBtr0114577,FBtr0299940,FBtr0299941:chr3L:+:5773150:5777785:PGRP-LD,Pmi::3-4-5.6.7.8	AFE	E1,E3	E2,E3	0.595983	1.73769	1.14171	0.000803542	0.0155532	0.275035	0.10638	0.168655
PHGPx	FBtr0073066,FBtr0073067,FBtr0073068:chr3L:+:3326264:3328626:PHGPx:<1:4-5>	A5SS	E1,E4	E1,E2,E4	0.649376	1.41693	0.767559	0.000874501	0.0165408	0.0617351	0.029165	0.0325701
PhKgamma	FBtr0090002,FBtr0301500,FBtr0301501:chrX:+:11589144:11598427:PhKgamma:6:8-9-10-11-12-13	A5SS	E6,E8	E6,E7,E8	-1.23787	-0.644829	0.593046	0.0285267	0.161709	0.317457	0.182113	0.135343
Pi3K21B	FBtr0331205,FBtr0331206,FBtr0331207,FBtr0331208:chr2L:+:297879:305233:Pi3K21B::5.6>	AFE	E1,E2,E5	E4,E5	3.421	20	16.579	0.0174868	0.12298	0.635955	1	-0.364045
Pi4KIIalpha	FBtr0078755,FBtr0078756,FBtr0078757,FBtr0301832:chr3R:-:1383384:1389347:Pi4KIIalpha::3-4-6-7-8-9-10-12>	AFE	E1,E3	E2,E3	2.0149	0.988611	-1.02629	0.0409113	0.202918	0.290213	0.542661	-0.252448
Piezo	FBtr0300332,FBtr0300333,FBtr0300334,FBtr0303398,FBtr0303399,FBtr0303400:chr2L:+:8163297:8190044:Piezo:10-11-12-13-14-15-16-17-18-20-21-22-23:25-26-27-28-29-30-31-32>	ES	E23,E25	E23,E24,E25	1.04145	0.23713	-0.804324	0.000916063	0.0170188	0.0793351	0.163658	-0.0843233
Pka-R2	FBtr0088437,FBtr0088438,FBtr0112901,FBtr0112902:chr2R:-:5881394:5913547:Pka-R2:4-5-6-7-8-9-10-11:	ALE	E11,E12,E13	E11,E14,E15	-2.73437	-1.81962	0.914751	0.0017457	0.0266003	0.231753	0.443052	-0.211299
plexA	FBtr0089223,FBtr0089224,FBtr0089225,FBtr0089226,FBtr0100296,FBtr0309865:chr4:-:1030520:1047720:plexA:6-7-8-9:11-12-13-14-15.16>	A3SS	E9,E10,E11	E9,E11	2.89959	4.57471	1.67512	0.0035013	0.0419716	0.907191	0.97969	-0.072499
Plip	FBtr0084453,FBtr0084454:chr3R:+:19584062:19585332:Plip::3-4-5>	AFE	E1,E3	E2,E3	-1.64182	-1.20805	0.433773	0.0100385	0.0864439	0.852861	0.789604	0.0632579
PMCA	FBtr0300554,FBtr0300555,FBtr0300556,FBtr0300557,FBtr0300558,FBtr0300559,FBtr0304046,FBtr0304047,FBtr0304048,FBtr0304049,FBtr0304050:chr4:-:348818:379543:PMCA:21:24	IR	E21,E24	E21,E22,E23,E24	-2.77259	-1.50804	1.26455	0.000136054	0.00436286	0.408597	0.171038	0.237558
PNUTS	FBtr0091486,FBtr0091487,FBtr0091489,FBtr0332000:chr2L:+:870464:877038:PNUTS:5-6-7-8:	ALE	E8,E10	E8,E9	-0.149986	-0.607887	-0.457901	0.03594	0.186065	0.210221	0.141531	0.0686901
pod1	FBtr0070964,FBtr0070965,FBtr0070966,FBtr0070967,FBtr0070968,FBtr0112956,FBtr0308228:chrX:+:6697719:6707863:pod1:12-13:15-16-17-18-19-20.21>	ES	E13,E15	E13,E14,E15	-1.55228	-2.19722	-0.644945	0.0391867	0.198096	0.74805	0.859453	-0.111403
pog	FBtr0077388,FBtr0100301,FBtr0304909,FBtr0304910:chr2L:+:4852864:4875233:pog:13-14:18>	ES	E14,E18	E14,E16	0.167054	1.67398	1.50692	0.0127507	0.102617	0.356764	0.112831	0.243933
Prat	FBtr0081764,FBtr0304705:chr3R:-:3735319:3737501:Prat:<1:3>	A3SS	E1,E3	E1,E2,E3	-1.47998	-2.24071	-0.76073	0.0233915	0.144835	0.804403	0.898155	-0.0937515
prel	FBtr0300293,FBtr0333003:chr2R:+:5311591:5313612:prel:<1:3-4-5>	A3SS	E1,E3	E1,E2,E3	-0.178248	-0.678895	-0.500647	0.00906554	0.0801535	0.527466	0.653103	-0.125637
PRL-1	FBtr0080856,FBtr0080857,FBtr0332357,FBtr0332358:chr2L:-:16245834:16257606:PRL-1::5-6.7-8-9-10>	AFE	E1,E5	E3,E5	1.16929	0.545173	-0.624114	0.000811284	0.0156327	0.497264	0.651659	-0.154395
Proc-R	FBtr0070713,FBtr0070714,FBtr0100551,FBtr0100552:chrX:+:4601950:4623527:Proc-R:<1:3	A5SS	E1,E3	E1,E2,E3	-20	-2.47116	17.5288	0.0162387	0.117625	1	0.732912	0.267088
prominin-like	FBtr0073118,FBtr0073119,FBtr0073120,FBtr0306258,FBtr0333895:chr3L:-:3114446:3127724:prominin-like:<1:5-6-7-8-9-10-11-12-13-14	ES	E1,E5	E1,E3	-1.27986	-2.37079	-1.09093	0.00377305	0.0440565	0.457165	0.728453	-0.271288
prominin-like	FBtr0073118,FBtr0073119,FBtr0073120,FBtr0306258,FBtr0333895:chr3L:-:3114446:3127724:prominin-like:5-6-7-8-9-10-11-12-13-14:16-17.18.19>	ES	E14,E16	E14,E15,E16	-2.65879	-3.33666	-0.677864	0.0183935	0.125826	0.865272	0.926912	-0.0616397
pros	FBtr0304603,FBtr0304604,FBtr0304605,FBtr0304606,FBtr0304607,FBtr0304608:chr3R:+:7155623:7232782:pros:8:11-12-13.14>	IR	E8,E11	E8,E9,E10,E11	-1.89155	-1.07044	0.821108	0.00962749	0.084084	0.700866	0.509205	0.191661
ps	FBtr0082037,FBtr0082038,FBtr0082039,FBtr0111027,FBtr0111028,FBtr0111029,FBtr0111030,FBtr0111031,FBtr0111032,FBtr0302691,FBtr0302692,FBtr0302693,FBtr0302694,FBtr0302695:chr3R:+:5243663:5275190:ps::11	AFE	E7,E11	E9,E11	1.40204	0.960627	-0.441416	0.0261855	0.155199	0.40619	0.522455	-0.116265
ps	FBtr0082037,FBtr0082038,FBtr0082039,FBtr0111027,FBtr0111028,FBtr0111029,FBtr0111030,FBtr0111031,FBtr0111032,FBtr0302691,FBtr0302692,FBtr0302693,FBtr0302694,FBtr0302695:chr3R:+:5243663:5275190:ps:<9:12-13-14	ES	E9,E11	E9,E12	-0.0312525	-0.580352	-0.549099	0.054905	0.23952	0.288342	0.205576	0.0827658
Psi	FBtr0087072,FBtr0087073,FBtr0087074:chr2R:-:12748825:12755219:Psi:3-4-5-6:8-9.10.11>	A3SS	E6,E8	E6,E7,E8	-2.16799	0.474272	2.64226	4.35183e-05	0.0019523	0.902502	0.372614	0.529888
Psi	FBtr0087072,FBtr0087073,FBtr0087074:chr2R:-:12748825:12755219:Psi:<1:3-4-5-6	IR	E1,E3	E1,E2,E3	1.54237	2.59027	1.04789	0.00179813	0.0269164	0.0757115	0.0273295	0.0483819
Psn	FBtr0078192,FBtr0078193,FBtr0114517,FBtr0333478,FBtr0333479:chr3L:+:20425567:20428256:Psn:5-6-7-8-9-10.11:13-14>	A5SS	E11,E13	E11,E12,E13	-0.385662	0.040822	0.426484	0.0328971	0.175492	0.440793	0.339694	0.101099
psq	FBtr0088275,FBtr0088276,FBtr0088277,FBtr0088278,FBtr0088279,FBtr0088280,FBtr0088281,FBtr0088282,FBtr0100606,FBtr0100607,FBtr0330607:chr2R:+:6445392:6504785:psq:13-15-16-17:20-21-22	IR	E17,E20	E17,E18,E19,E20	-2.80538	-2.00373	0.801649	0.0190899	0.128681	0.888193	0.776632	0.111562
psq	FBtr0088275,FBtr0088276,FBtr0088277,FBtr0088278,FBtr0088279,FBtr0088280,FBtr0088281,FBtr0088282,FBtr0100606,FBtr0100607,FBtr0330607:chr2R:+:6445392:6504785:psq:<11:13-15-16-17	A5SS	E11,E13	E11,E12,E13	-1.11241	-1.86214	-0.749735	0.0337978	0.177977	0.401129	0.558438	-0.157308
Ptx1	FBtr0089389,FBtr0089390,FBtr0089391,FBtr0273386,FBtr0330094:chr3R:+:26738609:26756404:Ptx1::6-7-8.9>	AFE	E1,E3,E6	E5,E6	2.2465	3.27336	1.02687	0.0555781	0.240541	0.0830826	0.256093	-0.17301
Pu	FBtr0071578,FBtr0071579,FBtr0071580,FBtr0308706:chr2R:+:17062821:17070119:Pu:4:	ALE	E4,E5	E4,E6,E7,E8,E9	-3.79402	-2.85071	0.943316	0.00118806	0.0201331	0.165108	0.349549	-0.184441
Pur-alpha	FBtr0089993,FBtr0089994,FBtr0089995,FBtr0089996,FBtr0310638,FBtr0310639,FBtr0310640:chr4:+:578607:587883:Pur-alpha:3.4:7.8-9.10-11-12-13-14	A5SS	E4,E7	E4,E5,E7	-2.70062	-1.62362	1.07699	0.00308341	0.0385157	0.908167	0.756033	0.152133
px	FBtr0071838,FBtr0112820,FBtr0112821,FBtr0331941,FBtr0331942:chr2R:-:18381801:18449570:px::17-18	AFE	E16,E17	E6,E7,E9,E10,E11,E12,E13,E14,E15,E17	-3.52891	-2.70805	0.820865	0.00182548	0.0271421	0.963493	0.920307	0.0431859
qtc	FBtr0079012,FBtr0079013,FBtr0100259,FBtr0100260,FBtr0100263,FBtr0302569,FBtr0332212,FBtr0332213,FBtr0332214,FBtr0332215:chr2L:+:5060814:5070750:qtc::8-9-10	AFE	E3,E8	E4,E8	0.218254	0.780159	0.561905	0.0430709	0.209516	0.477909	0.343971	0.133938
R	FBtr0072867,FBtr0303154,FBtr0332671:chr3L:-:1859114:1862239:R::4>	AFE	E1,E4	E3,E4	0.788007	0.1526	-0.635407	0.00013934	0.00443513	0.366519	0.523813	-0.157294
R	FBtr0072867,FBtr0303154,FBtr0332671:chr3L:-:1859114:1862239:R:<1:	ALE	E1,E2	E1,E4	-1.90383	-2.71409	-0.810264	0.00388566	0.0450045	0.739929	0.567428	0.172501
Rab11	FBtr0084010,FBtr0084011:chr3R:+:16937129:16941868:Rab11:<1:3-4-5-6>	IR	E1,E3	E1,E2,E3	1.06693	0.611787	-0.455143	1.84219e-05	0.000965351	0.065937	0.100958	-0.0350214
Rab30	FBtr0079426,FBtr0079427,FBtr0079428,FBtr0309323:chr2L:-:7030492:7032603:Rab30:2:	ALE	E2,E3	E2,E5,E6	-1.30287	-2.40876	-1.10589	0.0247503	0.149497	0.871135	0.646276	0.22486
Rab5	FBtr0077793,FBtr0077794,FBtr0077795,FBtr0077796,FBtr0077797,FBtr0077798,FBtr0330668,FBtr0330669,FBtr0330670:chr2L:-:2359195:2365273:Rab5:<4:10-11-12-13.14-15.16>	A5SS	E4,E10	E5,E10	1.80225	2.29449	0.492235	0.00660489	0.063778	0.0791527	0.0489233	0.0302294
Rad23	FBtr0089121,FBtr0089122,FBtr0333679:chr4:+:328718:331448:Rad23:<1:4-5-6.7>	ES	E1,E4	E1,E3	-2.61593	-3.8764	-1.26046	0.0135653	0.106394	0.504881	0.784879	-0.279999
Ranbp16	FBtr0074162,FBtr0303645,FBtr0303646,FBtr0303647,FBtr0303648:chrX:-:15821217:15827707:Ranbp16::20>	AFE	E19,E20	E3,E4,E5,E6,E7,E8,E9,E10,E11,E12,E13,E14,E15,E16,E20	-4.34575	-2.43927	1.90648	0.000545368	0.0120177	0.787557	0.425592	0.361965
Rbp6	FBtr0075285,FBtr0113427,FBtr0113428,FBtr0290066,FBtr0310005,FBtr0310006,FBtr0333861:chr3L:-:17052006:17231312:Rbp6:<7-8-9-10-11-13-14-17-18:21.22>	ES	E18,E21	E18,E19,E20,E21	-3.90197	-2.63458	1.26739	0.0164522	0.118616	0.926235	0.738259	0.187976
Rbp9	FBtr0077637,FBtr0077638,FBtr0077639,FBtr0077640,FBtr0100468,FBtr0290237,FBtr0290238,FBtr0330213:chr2L:+:2954761:2968434:Rbp9:<4-5-7-10.11-12:14-15-16.17>	ES	E12,E14	E12,E13,E14	-0.310155	-1.18958	-0.879429	0.0317671	0.172468	0.511784	0.721482	-0.209699
Rcd1	FBtr0087582,FBtr0087583,FBtr0087584,FBtr0310668,FBtr0310669,FBtr0310670,FBtr0310671:chr2R:-:10035767:10040624:Rcd1::4-5-6-7	AFE	E1,E4	E2,E3,E4	-1.3284	-1.8502	-0.521803	0.0522884	0.232351	0.630395	0.74034	-0.109945
Rcd-1	FBtr0074743,FBtr0074744:chrX:+:19532912:19534784:Rcd-1:<1.2:4-5-6-7-8>	IR	E2,E4	E2,E3,E4	-4.06044	-3.07919	0.981255	0.00575012	0.0577296	0.960229	0.901682	0.0585464
rdgB	FBtr0073822,FBtr0073823,FBtr0100194,FBtr0100195,FBtr0301532,FBtr0301533,FBtr0301534,FBtr0301535,FBtr0331716,FBtr0331717:chrX:+:13656784:13673521:rdgB:7-8-9-10-11:13-14-15.16-17-18	ES	E11,E13	E11,E12,E13	0.0953102	-0.652325	-0.747635	0.0326786	0.175087	0.340371	0.516252	-0.175882
Rfx	FBtr0082238,FBtr0112895,FBtr0305995,FBtr0305996,FBtr0305997:chr3R:-:6188232:6203790:Rfx:<1-2:4	A3SS	E2,E4	E2,E3,E4	-0.887303	1.29928	2.18659	0.00262544	0.0346081	0.637885	0.169391	0.468494
Rga	FBtr0078741,FBtr0078742:chr3R:-:1433064:1438834:Rga:<1-2-3-4:6>	A5SS	E4,E6	E4,E5,E6	-1.30517	-1.6782	-0.373036	0.0503275	0.2274	0.730038	0.79651	-0.0664721
rgr	FBtr0088692,FBtr0301542:chr2R:+:4487937:4498743:rgr:<1:3-4-5-6>	A3SS	E1,E3	E1,E2,E3	-0.380464	-0.875469	-0.495005	0.0472884	0.21994	0.272045	0.366367	-0.0943215
rhea	FBtr0305210,FBtr0305211,FBtr0305212,FBtr0333105,FBtr0333106,FBtr0333107,FBtr0333108,FBtr0333109:chr3L:+:8538100:8567509:rhea:15-16-17:	ALE	E17,E18	E17,E19,E20,E21,E22,E23,E24	-4.80641	-4.1649	0.641507	0.0111546	0.0934335	0.0496608	0.0904182	-0.0407573
RhoBTB	FBtr0078185,FBtr0330157,FBtr0330158:chr3L:+:20369341:20375498:RhoBTB:<1-3-4-5-6-7-8-9-10-11-12:14-15>	A3SS	E12,E14	E12,E13,E14	-1.77777	0.0689929	1.84677	0.000214193	0.00596948	0.793806	0.360608	0.433199
RhoGAP15B	FBtr0110990,FBtr0290096:chrX:+:16837751:16850028:RhoGAP15B:<1-2:4-5-6-7-8-9-10>	A5SS	E2,E4	E2,E3,E4	-1.9825	-1.36582	0.616684	0.0305882	0.168294	0.682475	0.53188	0.150594
RhoGAPp190	FBtr0074481,FBtr0074482,FBtr0074483,FBtr0333659,FBtr0333660,FBtr0333661,FBtr0333662:chrX:-:17533179:17546595:RhoGAPp190:14:16-17-18-19-20.21>	A5SS	E14,E16	E14,E15,E16	-1.62149	-0.949081	0.672406	0.00788736	0.0725738	0.809792	0.680592	0.1292
RIC-3	FBtr0071527,FBtr0071528,FBtr0113369,FBtr0113371,FBtr0301892,FBtr0301893,FBtr0301894,FBtr0301895,FBtr0301896,FBtr0301897,FBtr0301898,FBtr0301899,FBtr0301900,FBtr0301901,FBtr0301902,FBtr0310056,FBtr0310057:chr2R:+:16905289:16912423:RIC-3:<1.2-5:7-8-9	ES	E5,E7	E5,E6,E7	-1.35868	-2.68971	-1.33103	0.00351078	0.0419716	0.53406	0.796592	-0.262532
RIC-3	FBtr0071527,FBtr0071528,FBtr0113369,FBtr0113371,FBtr0301892,FBtr0301893,FBtr0301894,FBtr0301895,FBtr0301896,FBtr0301897,FBtr0301898,FBtr0301899,FBtr0301900,FBtr0301901,FBtr0301902,FBtr0310056,FBtr0310057:chr2R:+:16905289:16912423:RIC-3:14:16-17>	ES	E14,E16	E14,E15,E16	-0.0425596	0.425668	0.468227	0.01626	0.117625	0.265254	0.165276	0.0999779
rin	FBtr0082796,FBtr0082797,FBtr0082798,FBtr0082799,FBtr0082800:chr3R:+:9472725:9480285:rin:<1:4	IR	E1,E4	E1,E2,E3,E4	0.577706	1.20071	0.623004	0.0195729	0.130395	0.106	0.0607424	0.0452576
rl	FBtr0113700,FBtr0113701,FBtr0113702,FBtr0113703,FBtr0329919,FBtr0329920:chr2RHet:+:198175:251950:rl:6:	ALE	E6,E7	E6,E8	-2.49344	-7.1429	-4.64946	6.11375e-08	1.19413e-05	0.103642	0.001095	0.102547
rl	FBtr0113700,FBtr0113701,FBtr0113702,FBtr0113703,FBtr0329919,FBtr0329920:chr2RHet:+:198175:251950:rl:10:	ALE	E10,E11	E10,E12,E13,E14,E15,E17	-3.91202	-5.62865	-1.71663	0.000124642	0.00411912	0.11161	0.0241317	0.0874778
rl	FBtr0113700,FBtr0113701,FBtr0113702,FBtr0113703,FBtr0329919,FBtr0329920:chr2RHet:+:198175:251950:rl:<2:5	IR	E2,E5	E2,E3,E4,E5	-2.64817	-2.05658	0.591597	0.00238872	0.0326602	0.726275	0.600533	0.125743
RluA-1	FBtr0080039,FBtr0080040,FBtr0080041:chr2L:-:10463335:10474347:RluA-1:4-5-6-7:9-10-11-12-13>	ES	E7,E9	E7,E8,E9	-3.36144	-4.75369	-1.39224	0.0464631	0.218982	0.912541	0.973247	-0.0607066
RN-tre	FBtr0087603,FBtr0087604,FBtr0087605,FBtr0330626,FBtr0330627:chr2R:-:9872319:9878215:RN-tre:<1:	ALE	E1,E2,E3,E4	E1,E5,E6,E7,E8	-0.75914	-1.20523	-0.446086	0.0269008	0.156418	0.535119	0.408483	0.126636
Roc1a	FBtr0070122,FBtr0308651:chrX:+:541319:542630:Roc1a:<1:	ALE	E1,E2	E1,E3,E4,E5	-3.24749	-4.36781	-1.12032	0.000161378	0.00480933	0.299917	0.120585	0.179332
RpL10	FBtr0299869,FBtr0299870,FBtr0333910:chr3L:-:23086289:23088571:RpL10:<1:3-4-5-6.7>	A5SS	E1,E3	E1,E2,E3	1.02165	0.719033	-0.30262	3.32928e-08	7.15295e-06	0.227181	0.286124	-0.0589425
RpL17	FBtr0070980,FBtr0070981,FBtr0070982,FBtr0070983:chrX:-:6635569:6638290:RpL17:<1.2.3:8-9>	A5SS	E3,E8	E6,E8	1.44879	0.990439	-0.458355	0.00122967	0.0205599	0.0777124	0.117527	-0.0398149
RpL34a	FBtr0084972,FBtr0084973,FBtr0302369:chr3R:-:21884141:21884989:RpL34a:<1:4-5>	A3SS	E1,E4	E1,E3,E4	-0.481663	-0.991724	-0.510061	0.00185179	0.0273442	0.604144	0.722237	-0.118094
RpL35	FBtr0070800,FBtr0070801:chrX:+:5566474:5567576:RpL35::3-4>	AFE	E1,E3	E2,E3	-1.14626	-1.32159	-0.175333	0.00112978	0.0194967	0.644088	0.683363	-0.0392745
RpL37A	FBtr0079016,FBtr0079017,FBtr0302570:chr2L:+:5070956:5072055:RpL37A::4-5-6.7>	AFE	E1,E2,E4	E3,E4	1.99371	2.55894	0.565239	0.00119608	0.0201552	0.875668	0.925695	-0.0500272
RpL7A	FBtr0070915,FBtr0070916:chrX:-:6425048:6427318:RpL7A::4-5-6-7-8>	AFE	E1,E2,E4	E3,E4	1.79384	2.15315	0.359305	0.000207044	0.00589185	0.880303	0.912917	-0.0326143
RpL9	FBtr0080163,FBtr0080164:chr2L:-:11002832:11004189:RpL9::3-4-5>	AFE	E1,E3	E2,E3	1.22518	1.8828	0.65762	0.00260078	0.0345159	0.210738	0.121932	0.0888057
RpS18	FBtr0086273,FBtr0086274:chr2R:+:16151476:16152353:RpS18::3-4-5>	AFE	E1,E3	E2,E3	0.597397	0.971781	0.374384	0.0149866	0.111838	0.266369	0.202594	0.0637752
RpS21	FBtr0077621,FBtr0077623,FBtr0273293:chr2L:+:2856069:2857041:RpS21:<1-2-3:5.6>	IR	E3,E5	E3,E4,E5	-1.28157	-0.90808	0.373488	1.19417e-05	0.000787017	0.614164	0.522652	0.0915122
Rya-r44F	FBtr0088637,FBtr0088638,FBtr0088639,FBtr0088640,FBtr0304568,FBtr0304569,FBtr0304570,FBtr0304571,FBtr0304572,FBtr0308083:chr2R:+:4747868:4775602:Rya-r44F:<1-3-4:6-7-8-9-10-11	ES	E4,E6	E4,E5,E6	-1.40534	-0.238411	1.16693	0.00690367	0.0654061	0.770406	0.566916	0.20349
Saf-B	FBtr0084699,FBtr0084700,FBtr0100424,FBtr0331696:chr3R:+:20643185:20648072:Saf-B:<1-2-3-4-5:9-10-11>	ES	E5,E9	E5,E7,E9	-3.20003	-1.54664	1.6534	3.45435e-05	0.00164926	0.529685	0.179029	0.350657
Saf-B	FBtr0084699,FBtr0084700,FBtr0100424,FBtr0331696:chr3R:+:20643185:20648072:Saf-B:7:9-10-11>	IR	E7,E9	E7,E8,E9	0.924476	0.0460911	-0.878385	0.000349201	0.00877495	0.0494911	0.11087	-0.061379
Sans	FBtr0087790,FBtr0087791:chr2R:+:8824399:8827917:Sans:<1:3-4-5-6-7>	A5SS	E1,E3	E1,E2,E3	-0.426084	0.519875	0.94596	0.000456069	0.0106507	0.573552	0.34233	0.231222
Sap130	FBtr0075927,FBtr0075928,FBtr0075929,FBtr0114506,FBtr0332043,FBtr0332044:chr3L:+:12799001:12806136:Sap130:6-7-8-9:12-13-14-15-16>	A3SS	E9,E10,E11,E12	E9,E12	1.31032	1.90906	0.598734	0.0538412	0.235836	0.701313	0.808421	-0.107107
Sap47	FBtr0083204,FBtr0083205,FBtr0083206,FBtr0083207,FBtr0083208,FBtr0083209,FBtr0083210,FBtr0301655,FBtr0310672:chr3R:+:11760821:11787846:Sap47:<2:4.5	IR	E2,E4	E2,E3,E4	-4.08691	-2.15387	1.93304	8.98897e-05	0.00328021	0.910219	0.593206	0.317013
Sap47	FBtr0083204,FBtr0083205,FBtr0083206,FBtr0083207,FBtr0083208,FBtr0083209,FBtr0083210,FBtr0301655,FBtr0310672:chr3R:+:11760821:11787846:Sap47:11:13-14-15	A5SS	E11,E13	E11,E12,E13	-2.2882	-1.8318	0.4564	0.0150527	0.111906	0.873542	0.8217	0.0518414
sbb	FBtr0086766,FBtr0301547,FBtr0301548,FBtr0301549,FBtr0301550,FBtr0301551,FBtr0329996,FBtr0329997:chr2R:-:14165702:14244801:sbb:<1:3-4	IR	E1,E3	E1,E2,E3	-0.117783	0.619039	0.736822	0.0325347	0.174534	0.0607905	0.0232886	0.037502
SC35	FBtr0089898,FBtr0089899,FBtr0302910,FBtr0306252:chr2L:-:12431074:12434665:SC35:<1-2-3-4-5:8>	IR	E5,E8	E5,E6,E7,E8	-2.40644	-2.90669	-0.500257	0.0514164	0.23017	0.527538	0.656422	-0.128885
Scgdelta	FBtr0070277,FBtr0302028,FBtr0302174,FBtr0302175:chrX:-:1639908:1648096:Scgdelta:<1.2:5.6-7-8-9-10>	A5SS	E2,E5	E2,E3,E5	-2.63906	-1.29392	1.34514	0.0220139	0.139932	0.926343	0.769125	0.157218
schlank	FBtr0070937,FBtr0070938:chrX:-:6151700:6161260:schlank:<2:4-5-6-7-8-9>	IR	E2,E4	E2,E3,E4	-2.19509	-1.63959	0.555495	0.00583573	0.0579942	0.5664	0.442117	0.124284
scrib	FBtr0308620,FBtr0308621,FBtr0308622,FBtr0308623,FBtr0308624,FBtr0308625,FBtr0308626,FBtr0308627,FBtr0308628,FBtr0308629,FBtr0308630,FBtr0308631,FBtr0308632,FBtr0308633,FBtr0308634:chr3R:+:22362071:22429773:scrib:5:8-9-10-11	A5SS	E5,E8	E5,E6,E7,E8	-0.663325	-1.25396	-0.590639	0.00626775	0.0614898	0.440854	0.593854	-0.153
scro	FBtr0113750,FBtr0113751,FBtr0113752,FBtr0113753:chr3LHet:+:207492:252455:scro:<1.2:4	ES	E2,E4	E2,E3,E4	-0.944462	-1.80555	-0.861091	0.0516175	0.23017	0.203031	0.362564	-0.159533
sd	FBtr0074099,FBtr0074100,FBtr0074101,FBtr0112824,FBtr0112825,FBtr0112826,FBtr0112827,FBtr0301543,FBtr0301544,FBtr0308128,FBtr0308129,FBtr0308130,FBtr0308131,FBtr0308132,FBtr0308133,FBtr0308134,FBtr0310311,FBtr0310312,FBtr0310313:chrX:+:15698404:15721714:sd:21-22-23-25:27-28-29-30-31.32.33.34>	A3SS	E25,E27	E25,E26,E27	0.4379	-0.163629	-0.60153	0.00571306	0.0574919	0.330825	0.477108	-0.146283
sd	FBtr0074099,FBtr0074100,FBtr0074101,FBtr0112824,FBtr0112825,FBtr0112826,FBtr0112827,FBtr0301543,FBtr0301544,FBtr0308128,FBtr0308129,FBtr0308130,FBtr0308131,FBtr0308132,FBtr0308133,FBtr0308134,FBtr0310311,FBtr0310312,FBtr0310313:chrX:+:15698404:15721714:sd:<8.9:16	A3SS	E9,E14	E9,E16	1.68681	-0.485873	-2.17268	0.0448143	0.215158	0.643836	0.122093	0.521743
SdhA	FBtr0086552,FBtr0086553,FBtr0086554:chr2R:-:15279367:15283477:SdhA:4:6-7-8-9>	IR	E4,E6	E4,E5,E6	-1.77242	-1.16402	0.608392	0.000128121	0.00417074	0.679875	0.534912	0.144963
sdk	FBtr0070130,FBtr0070131,FBtr0070132,FBtr0070133,FBtr0302259,FBtr0302260:chrX:+:580872:643529:sdk:<1.2.3:6-7-8-9-10-11	A5SS	E3,E6	E3,E4,E6	-0.242313	0.726484	0.968797	7.49544e-05	0.00287833	0.380162	0.188805	0.191358
sdt	FBtr0089974,FBtr0089975,FBtr0089978,FBtr0100375,FBtr0100376,FBtr0111034,FBtr0308217,FBtr0308218,FBtr0308219,FBtr0308220,FBtr0333720,FBtr0333721:chrX:+:8072581:8134507:sdt:18-19:21.22	A3SS	E19,E21	E19,E20,E21	0.287682	1.26567	0.977984	0.0269937	0.156534	0.0973924	0.0393316	0.0580608
sec23	FBtr0078710,FBtr0078711,FBtr0304794,FBtr0309091,FBtr0310266,FBtr0330314:chr3R:+:1474786:1478351:sec23:<1.2:5-6-7-8	IR	E2,E5	E2,E3,E4,E5	-0.167468	-0.591429	-0.423961	0.00151211	0.0238005	0.257744	0.343944	-0.0861998
sec23	FBtr0078710,FBtr0078711,FBtr0304794,FBtr0309091,FBtr0310266,FBtr0330314:chr3R:+:1474786:1478351:sec23:5-6-7-8:11>	ES	E8,E11	E8,E9,E11	-0.174447	0.239868	0.414315	0.0138161	0.107044	0.454315	0.361017	0.0932978
SelR	FBtr0082291,FBtr0082292,FBtr0082294,FBtr0082295,FBtr0273345,FBtr0273346,FBtr0273347,FBtr0306641:chr3R:-:6689076:6694379:SelR:3.4-5:9>	A3SS	E5,E9	E5,E8,E9	-0.468182	-0.808269	-0.340087	0.0153524	0.113155	0.490935	0.567164	-0.076229
Sema-2a	FBtr0087088,FBtr0087089,FBtr0087090,FBtr0087091:chr2R:+:12387700:12420934:Sema-2a::7-8-9-10-11-12-13-14-15-16-17-18-19>	AFE	E1,E2,E7	E5,E6,E7	-0.614654	-0.232911	0.381743	0.00299269	0.0377114	0.725176	0.644394	0.0807817
Sesn	FBtr0072087,FBtr0113113,FBtr0113114:chr2R:+:19601424:19620706:Sesn:<1:3.4-5-6-7-8-9-10-11-12>	A5SS	E1,E3	E1,E2,E3	-1.47699	-1.86573	-0.388743	0.0219055	0.139932	0.698968	0.774886	-0.0759176
SF1	FBtr0083456,FBtr0331706,FBtr0331707:chr3R:+:13366142:13370870:SF1:<1-2-3:6-7>	ES	E3,E6	E4,E6	-2.68558	-1.21392	1.47165	0.00319638	0.0394197	0.84662	0.57121	0.27541
sfl	FBtr0076968,FBtr0301562:chr3L:+:6488779:6543108:sfl:<1:3-4-5-6-7>	ES	E1,E3	E1,E2,E3	-1.86214	20	21.8621	9.1846e-09	2.32154e-06	0.786438	0	0.786438
Shab	FBtr0305201,FBtr0305202,FBtr0305203,FBtr0305205,FBtr0305206,FBtr0305207,FBtr0305208,FBtr0305209,FBtr0333898,FBtr0333899:chr3L:+:2895016:2959579:Shab::5-6-7.8-9-12.13-14-15-18-19-20	AFE	E1,E5	E4,E5	0.274437	-0.546544	-0.820981	0.0441358	0.212852	0.562779	0.773851	-0.211071
Shal	FBtr0074973,FBtr0112853,FBtr0333273:chr3L:-:19559950:19577668:Shal:<1:3-4-5-6	A5SS	E1,E3	E1,E2,E3	1.40339	0.559616	-0.843773	0.00208492	0.0295624	0.164687	0.31677	-0.152083
shep	FBtr0077172,FBtr0077173,FBtr0077174,FBtr0301599,FBtr0308859,FBtr0333287,FBtr0333288,FBtr0333289:chr3L:-:5148920:5271044:shep:21:24.25.26.27>	ES	E21,E24	E21,E23	1.97081	3.18497	1.21417	0.0320043	0.172811	0.0690226	0.020464	0.0485586
shot	FBtr0087616,FBtr0087617,FBtr0087618,FBtr0087619,FBtr0087620,FBtr0087621,FBtr0273222,FBtr0273223,FBtr0273224,FBtr0273225,FBtr0273226,FBtr0301591,FBtr0301592,FBtr0301593,FBtr0301964,FBtr0304847,FBtr0304848,FBtr0304849,FBtr0304850,FBtr0304851,FBtr0304852,FBtr0304853:chr2R:-:9751741:9829615:shot:34-35-36-37:40-41	ME	E37,E38,E40	E37,E39,E40	1.80503	2.14985	0.344823	0.00971362	0.0844928	0.850672	0.888018	-0.0373462
sif	FBtr0112708,FBtr0112709,FBtr0112710,FBtr0112712,FBtr0112713,FBtr0114646,FBtr0330122,FBtr0330123,FBtr0330124,FBtr0330125,FBtr0330126:chr3L:+:5652528:5742699:sif:4-5-6-7:10-11-12-13-14	A3SS	E7,E10	E7,E9,E10	-2.56495	-0.405465	2.15948	0.00395934	0.045405	0.892902	0.496202	0.396701
skap	FBtr0081957,FBtr0113206,FBtr0301786,FBtr0301787,FBtr0303525,FBtr0303526:chr3R:+:4764404:4768749:skap:4-5-6-7-8:10-11.12>	ES	E8,E10	E8,E9,E10	2.02622	1.45175	-0.574469	0.0114094	0.0948286	0.111309	0.191066	-0.0797569
skd	FBtr0078328,FBtr0078329,FBtr0112830,FBtr0333284:chr3L:-:20985913:21020534:skd:<1:5-6-7-8-9-10	A5SS	E1,E5	E1,E2,E5	-0.880359	-1.91692	-1.03656	0.0505022	0.227545	0.382909	0.611933	-0.229024
slgA	FBtr0077203,FBtr0077204,FBtr0077205,FBtr0077206,FBtr0077207,FBtr0077208,FBtr0077209,FBtr0077210,FBtr0307524,FBtr0307525,FBtr0307526,FBtr0307527,FBtr0307528,FBtr0307529:chrX:+:21245017:21256188:slgA:<2:9-10-12-13-16-17-18-19-20-21.22>	A5SS	E2,E9	E2,E3,E4,E9	-1.19463	-0.434286	0.760341	0.00325026	0.0399039	0.32877	0.183081	0.14569
sli	FBtr0330729,FBtr0330730,FBtr0330731,FBtr0330732,FBtr0330733,FBtr0330734:chr2R:-:11757558:11809623:sli:4.5-6-7:9-10-11-12-13-14-15-16-17-18-19-20-21-22	ES	E7,E9	E7,E8,E9	-1.71441	-2.1471	-0.43269	0.019106	0.128681	0.692688	0.77962	-0.0869328
Slip1	FBtr0089090,FBtr0310536,FBtr0310537:chr4:+:684213:690510:Slip1:<1-2:4	ES	E2,E4	E2,E3,E4	-2.38677	-1.79588	0.590891	0.0357782	0.185451	0.598007	0.443545	0.154462
slo	FBtr0084683,FBtr0084684,FBtr0084685,FBtr0100622,FBtr0100623,FBtr0100624,FBtr0100627,FBtr0100629,FBtr0100631,FBtr0100632,FBtr0100633,FBtr0100634,FBtr0100635,FBtr0100636,FBtr0100637,FBtr0100638,FBtr0301581,FBtr0301582,FBtr0330286,FBtr0330287:chr3R:+:20488216:20536911:slo:21-22-25:28-29	ES	E25,E28	E25,E27	0.200671	1.50408	1.30341	0.0373553	0.191755	0.257422	0.0738929	0.18353
slo	FBtr0084683,FBtr0084684,FBtr0084685,FBtr0100622,FBtr0100623,FBtr0100624,FBtr0100627,FBtr0100629,FBtr0100631,FBtr0100632,FBtr0100633,FBtr0100634,FBtr0100635,FBtr0100636,FBtr0100637,FBtr0100638,FBtr0301581,FBtr0301582,FBtr0330286,FBtr0330287:chr3R:+:20488216:20536911:slo:6-7-8-9-10:14	ME	E10,E11,E14	E10,E13,E14	-0.569768	-0.143894	0.425874	0.0562569	0.241736	0.361179	0.499924	-0.138745
smg	FBtr0076549,FBtr0076550,FBtr0076551,FBtr0290103,FBtr0290104:chr3L:-:8983416:8991089:smg::7-8	AFE	E1,E7	E3,E7	1.07103	20	18.929	0.017435	0.122817	0.35944	0	0.35944
smi35A	FBtr0089288,FBtr0089289,FBtr0089290,FBtr0100447,FBtr0100448,FBtr0329933:chr2L:-:14184477:14234122:smi35A:6:8-9-10-11-12-13-14>	ES	E6,E8	E6,E7,E8	-2.78501	-3.72397	-0.93896	0.0407935	0.202899	0.898455	0.956368	-0.0579132
smid	FBtr0076851,FBtr0301611,FBtr0331849,FBtr0331850,FBtr0333404:chr3L:+:7374713:7378737:smid:<2-4-5:7-8-9-10-11-12>	A3SS	E5,E7	E5,E6,E7	-0.883191	-1.67147	-0.788283	0.0147873	0.11169	0.694344	0.8317	-0.137356
SNF1A	FBtr0070216,FBtr0070217,FBtr0070218:chrX:+:1269579:1272890:SNF1A:<1:3.4-5>	IR	E1,E3	E1,E2,E3	0.435318	0.842183	0.406865	0.00347937	0.0419716	0.17015	0.120267	0.0498827
SNF4Agamma	FBtr0084018,FBtr0084019,FBtr0084020,FBtr0084021,FBtr0084022,FBtr0084024,FBtr0110937,FBtr0110938,FBtr0110939,FBtr0112915,FBtr0112916,FBtr0301585,FBtr0301586,FBtr0301587,FBtr0301588,FBtr0301589:chr3R:+:16966460:17039991:SNF4Agamma::10-11-12	AFE	E1,E3,E4,E10	E7,E8,E9,E10	0.372926	-0.346004	-0.71893	4.85121e-07	6.51426e-05	0.242514	0.396175	-0.153661
sns	FBtr0088635,FBtr0111043:chr2R:+:4686021:4743142:sns::19-20-21-22>	AFE	E1,E2,E3,E4,E5,E6,E7,E8,E9,E10,E11,E12,E13,E14,E15,E16,E18,E19	E17,E19	2.43121	1.95905	-0.472152	0.0516265	0.23017	0.36151	0.261787	0.0997234
Sod3	FBtr0089938,FBtr0089939,FBtr0100658,FBtr0110897:chr2R:-:7267848:7271613:Sod3:6-7-8-9:	ALE	E9,E10,E11	E9,E12	-0.693147	-0.136576	0.556572	0.0330471	0.175862	0.475184	0.627874	-0.15269
sol	FBtr0089676,FBtr0089677,FBtr0089678,FBtr0089679,FBtr0301583:chrX:+:21221356:21228939:sol:6:8-9-10-11-12>	A3SS	E6,E8	E6,E7,E8	-2.32239	-1.26369	1.0587	0.0493751	0.224534	0.905783	0.772084	0.133699
Spargel	FBtr0078946,FBtr0301244:chr3R:-:248204:255051:Spargel:<1-2-3:5-6-7-8.9>	A3SS	E3,E5	E3,E4,E5	-1.9287	-2.95565	-1.02696	0.0347193	0.181495	0.810081	0.927666	-0.117585
spas	FBtr0084533,FBtr0084534,FBtr0321260:chr3R:+:19863936:19868376:spas:<1-2:4-5-6.7>	ES	E2,E4	E2,E3,E4	-1.38629	-0.786479	0.599815	0.0202286	0.133918	0.456988	0.316402	0.140586
SpdS	FBtr0082078,FBtr0082079,FBtr0306007:chr3R:+:5457360:5459395:SpdS:<1:3.4>	ES	E1,E3	E1,E2,E3	0.951721	0.361502	-0.590219	7.18688e-05	0.00280746	0.071565	0.12692	-0.0553549
Spf45	FBtr0111239,FBtr0111240,FBtr0111241:chr2L:-:22959605:22961179:Spf45:<1:4-5>	A3SS	E1,E4	E1,E3,E4	-2.14196	-3.45607	-1.31411	0.000180435	0.00527434	0.815313	0.94415	-0.128838
spi	FBtr0081267,FBtr0081268,FBtr0081269,FBtr0081270,FBtr0100597:chr2L:-:19567899:19577324:spi::4	AFE	E1,E4	E3,E4	1.82288	1.45214	-0.370738	0.00476008	0.0521788	0.168079	0.226895	-0.0588151
Spn	FBtr0304613,FBtr0304614,FBtr0304615,FBtr0304616,FBtr0304617,FBtr0304618,FBtr0304619,FBtr0304620,FBtr0304621,FBtr0308203:chr3L:-:2505244:2554292:Spn:15:19	ES	E15,E19	E18,E19	-1.77649	-0.847298	0.929194	0.0410688	0.20329	0.214109	0.102482	0.111628
Spn	FBtr0304613,FBtr0304614,FBtr0304615,FBtr0304616,FBtr0304617,FBtr0304618,FBtr0304619,FBtr0304620,FBtr0304621,FBtr0308203:chr3L:-:2505244:2554292:Spn:7-8-9-10:12	A3SS	E10,E12	E10,E11,E12	1.75314	1.14072	-0.612421	0.04626	0.218982	0.127671	0.212605	-0.0849346
Spn4	FBtr0086196,FBtr0086197,FBtr0086198,FBtr0086199,FBtr0086200,FBtr0086201,FBtr0086202,FBtr0086203,FBtr0086204,FBtr0086205,FBtr0300336:chr2R:-:2763408:2766428:Spn4:8:10	IR	E8,E10	E9,E10	0.254551	-1.20438	-1.45893	0.00782548	0.072159	0.256495	0.581832	-0.325338
Spn77Ba	FBtr0074841,FBtr0074842:chr3L:+:20310289:20313047:Spn77Ba:<1:3-4-5-6-7>	IR	E1,E3	E1,E2,E3	-0.693147	0.0320883	0.725236	0.00659529	0.063778	0.484817	0.297897	0.186919
Sppl	FBtr0084909,FBtr0084910,FBtr0084911,FBtr0300819,FBtr0300820:chr3R:+:21707706:21713286:Sppl::4	AFE	E1,E4	E3,E4	2.34857	4.84812	2.49955	0.00516652	0.05428	0.119101	0.0115171	0.107584
Spred	FBtr0087468,FBtr0329879,FBtr0329880:chr2R:-:10647150:10656927:Spred:<1:3-4-5	A5SS	E1,E3	E1,E2,E3	-4.6995	-2.5511	2.14839	0.00801621	0.0734449	0.989425	0.856276	0.133149
srpk79D	FBtr0078496,FBtr0303599,FBtr0303600,FBtr0304724,FBtr0306594,FBtr0306595,FBtr0306596,FBtr0306597:chr3L:+:22267108:22277435:srpk79D:7:9-10-11.12.13.14>	A3SS	E7,E9	E7,E8	-1.06784	-2.44235	-1.37451	0.0348361	0.181884	0.227242	0.553314	-0.326072
Ssdp	FBtr0083611,FBtr0083612,FBtr0083613,FBtr0330051:chr3R:-:14018215:14025317:Ssdp:<1:3.4.5>	A5SS	E1,E3	E1,E2,E3	-1.05091	-0.254947	0.795966	0.00496183	0.0533025	0.201994	0.104218	0.0977764
stai	FBtr0079196,FBtr0079197,FBtr0079198,FBtr0304908,FBtr0333406:chr2L:+:6100376:6124653:stai::7-8-9	AFE	E1,E2,E7	E3,E4,E5,E7	-0.577574	-0.246505	0.331069	0.00041903	0.0100767	0.436761	0.356499	0.0802621
stai	FBtr0079196,FBtr0079197,FBtr0079198,FBtr0304908,FBtr0333406:chr2L:+:6100376:6124653:stai:7-8-9:11.12>	ES	E9,E10,E11	E9,E11	2.77538	3.47992	0.704537	0.00148797	0.0236808	0.794334	0.888676	-0.094342
stan	FBtr0088214,FBtr0300578,FBtr0303223,FBtr0304899,FBtr0304900,FBtr0330601:chr2R:+:6560849:6608643:stan:<1-2-4-5-6:9>	ES	E6,E9	E6,E8,E9	-0.606136	0.733969	1.3401	0.00493015	0.0530985	0.623263	0.297144	0.326119
stc	FBtr0080705,FBtr0080706,FBtr0332473,FBtr0332474:chr2L:+:15113479:15118069:stc:<1:3.4-5-6-7>	A5SS	E1,E3	E1,E2,E3	0.538997	1.09861	0.559616	0.0426513	0.208739	0.292077	0.189074	0.103003
stck	FBtr0081844,FBtr0081845,FBtr0081846,FBtr0306260:chr3R:+:4182688:4185686:stck:<1:5-6-7-8-9.10>	ES	E1,E5	E1,E3,E5	-2.37575	-3.18011	-0.804363	0.000310492	0.00798914	0.756724	0.863055	-0.106332
Strn-Mlck	FBtr0087271,FBtr0087274,FBtr0087275,FBtr0087276,FBtr0302788,FBtr0302789,FBtr0302790,FBtr0302791,FBtr0302792,FBtr0302793,FBtr0302794,FBtr0302795,FBtr0302796:chr2R:-:11834430:11873458:Strn-Mlck:32-34-35-36-37-38:40>	ES	E38,E40	E38,E39,E40	0.645138	-0.265703	-0.910841	0.000404665	0.00982398	0.0331326	0.0779123	-0.0447796
stv	FBtr0075806,FBtr0075807,FBtr0075808,FBtr0075809,FBtr0113425,FBtr0332078,FBtr0332079:chr3L:+:13470640:13476615:stv:<1:6	A3SS	E1,E6	E1,E5	0.752909	1.94421	1.1913	0.0226076	0.142441	0.291903	0.131662	0.160241
Su(var)205	FBtr0079635,FBtr0079636:chr2L:-:8209625:8211122:Su(var)205:<1:3-4-5-6>	IR	E1,E3	E1,E2,E3	-1.56122	0.233632	1.79485	7.43046e-08	1.3882e-05	0.586626	0.192989	0.393637
Su(z)12	FBtr0074916,FBtr0074917:chr3L:-:19911341:19916562:Su(z)12:<1-2-3-4-5:7>	ES	E5,E7	E5,E6,E7	-0.654681	-1.56323	-0.908544	0.00109954	0.0194309	0.313709	0.526842	-0.213133
sv	FBtr0089327,FBtr0089328,FBtr0100342,FBtr0100343,FBtr0100344,FBtr0100345,FBtr0100346,FBtr0301563:chr4:+:1109443:1133943:sv:11.12:15-17>	ES	E12,E15	E12,E13,E15	-2.15176	-20	-17.8482	0.0263329	0.155356	0.488412	1	-0.511588
Swim	FBtr0071784,FBtr0071785:chr2R:-:18077325:18090178:Swim::3-4-5>	AFE	E1,E3	E2,E3	-1.09861	-1.74345	-0.644839	0.00138741	0.0224969	0.819332	0.902258	-0.0829256
swm	FBtr0081244,FBtr0081245,FBtr0331325,FBtr0331326:chr2L:+:19493250:19497978:swm:3-4:6-7-8.9>	A3SS	E4,E6	E4,E5,E6	1.45799	2.17222	0.714237	0.0176736	0.12306	0.179915	0.0977095	0.0822056
sxc	FBtr0086084,FBtr0086085,FBtr0086086:chr2R:+:1194755:1216986:sxc:<1.2.3:6-7-8-9-10-11-12-13-14>	A3SS	E3,E6	E3,E5,E6	-2.02772	-1.64949	0.378238	0.0361607	0.186983	0.777652	0.705523	0.0721288
Sxl	FBtr0331247,FBtr0331248,FBtr0331249,FBtr0331250,FBtr0331251,FBtr0331252,FBtr0331253,FBtr0331254,FBtr0331255,FBtr0331256,FBtr0331257,FBtr0331258,FBtr0331259,FBtr0331260,FBtr0331261,FBtr0331262,FBtr0331263,FBtr0331264,FBtr0331265,FBtr0331266,FBtr0331267,FBtr0331268,FBtr0331269,FBtr0331270,FBtr0331271:chrX:-:6968582:6992089:Sxl:<3-5:14	A3SS	E5,E13,E14	E5,E14	0.137908	0.931163	0.793256	1.75697e-09	6.29143e-07	0.367248	0.561478	-0.194231
syd	FBtr0076768,FBtr0076769,FBtr0300412,FBtr0300413,FBtr0332787,FBtr0332788,FBtr0332789,FBtr0332790,FBtr0332791,FBtr0332792:chr3L:-:7919124:7929220:syd:<1:4-5-6-7-8	ES	E1,E4	E1,E3,E4	0.150034	0.703626	0.553592	0.0493328	0.224534	0.403122	0.256521	0.146601
Syt7	FBtr0089134,FBtr0089137,FBtr0089138,FBtr0089139,FBtr0100397,FBtr0114475,FBtr0305658,FBtr0305659,FBtr0305660:chr4:-:299302:327107:Syt7:11-12-13-14-15-16:21>	ES	E16,E21	E16,E18,E19,E20,E21	-2.38482	-3.46747	-1.08265	0.000480125	0.0108584	0.680685	0.842977	-0.162293
Syt7	FBtr0089134,FBtr0089137,FBtr0089138,FBtr0089139,FBtr0100397,FBtr0114475,FBtr0305658,FBtr0305659,FBtr0305660:chr4:-:299302:327107:Syt7:<4.5.6:11-12-13-14-15-16	A5SS	E6,E11	E6,E7,E11	-2.27727	-1.20397	1.07329	0.0496032	0.224534	0.858728	0.640298	0.218431
Syx4	FBtr0070494,FBtr0332496:chrX:-:2633121:2638109:Syx4::3-4-5-6-7-8>	AFE	E1,E3	E2,E3	0.875469	-0.268264	-1.14373	0.0261627	0.155199	0.855855	0.94023	-0.0843744
Syx7	FBtr0078351,FBtr0078352:chr3L:+:21438933:21441228:Syx7::3-4-5-6-7>	AFE	E1,E3	E2,E3	4.38411	2.95856	-1.42554	0.00159532	0.0247476	0.057902	0.219786	-0.161884
tacc	FBtr0089949,FBtr0089950,FBtr0089951,FBtr0089952,FBtr0089953,FBtr0089955,FBtr0302613,FBtr0302614,FBtr0302615,FBtr0302616,FBtr0306654,FBtr0332445,FBtr0332446:chr3R:-:559375:574778:tacc:6-7:11-12.13-14-15-16-17-18	A3SS	E7,E10	E7,E11	0.169076	-0.613104	-0.782181	0.0160607	0.117056	0.390204	0.213723	0.176481
Taf12	FBtr0082440,FBtr0082442,FBtr0290205:chr3R:-:7504098:7505408:Taf12:<1.2:4	IR	E2,E4	E2,E3,E4	-1.13924	-0.359981	0.779261	0.00801577	0.0734449	0.415417	0.251032	0.164384
tara	FBtr0083257,FBtr0083258:chr3R:+:12051370:12086024:tara::3>	AFE	E1,E3	E2,E3	-3.51155	-1.60944	1.90211	0.0307388	0.16869	0.982211	0.893374	0.0888372
Task6	FBtr0301654:chr3R:-:9494312:9497823:Task6:<1-2-3-4-5-6:8>	ES	E6,E8	E6,E7,E8	0.485508	-1.20397	-1.68948	0.00685162	0.0652777	0.252406	0.659728	-0.407322
tay	FBtr0074167,FBtr0310065,FBtr0310066:chrX:-:15770715:15781319:tay:<1:4-5-6-7-8-9-10-11-12-13-14-15-16>	A5SS	E1,E4	E2,E4	0.154151	-2.19722	-2.35138	0.0139262	0.107418	0.247901	0.75756	-0.509659
TepIV	FBtr0081254,FBtr0331328,FBtr0331329,FBtr0331330:chr2L:+:19548506:19556451:TepIV::3-4-5-6-7	AFE	E1,E3	E2,E3	-2.53283	-1.93352	0.599308	0.00150415	0.0237623	0.934587	0.886957	0.0476299
TFAM	FBtr0083948,FBtr0083949:chr3R:-:16401072:16402741:TFAM:<1:3-4>	IR	E1,E3	E1,E2,E3	0.937367	1.65138	0.714009	0.0579934	0.246	0.129314	0.067939	0.0613755
tkv	FBtr0079086,FBtr0079087,FBtr0079088,FBtr0079089:chr2L:-:5218995:5271353:tkv::6-7>	AFE	E1,E4,E6	E5,E6	0.27972	0.598647	0.318927	0.023392	0.144835	0.856816	0.888442	-0.0316255
Tm1	FBtr0089957,FBtr0089959,FBtr0089960,FBtr0089961,FBtr0089962,FBtr0089963,FBtr0089964,FBtr0089965,FBtr0089967,FBtr0089968,FBtr0301959,FBtr0301960,FBtr0305654,FBtr0305655,FBtr0305656,FBtr0333917,FBtr0333918:chr3R:+:11107092:11134501:Tm1:<12:14>	IR	E12,E14	E12,E13,E14	-1.87584	-20	-18.1242	1.78169e-05	0.000950135	0.621927	1	-0.378073
Tm1	FBtr0089957,FBtr0089959,FBtr0089960,FBtr0089961,FBtr0089962,FBtr0089963,FBtr0089964,FBtr0089965,FBtr0089967,FBtr0089968,FBtr0301959,FBtr0301960,FBtr0305654,FBtr0305655,FBtr0305656,FBtr0333917,FBtr0333918:chr3R:+:11107092:11134501:Tm1:28:	ALE	E28,E29,E30	E28,E33,E34,E35,E36	-2.1078	-2.52297	-0.415175	0.000197176	0.00572475	0.0979629	0.0667001	0.0312628
tmod	FBtr0085658,FBtr0085659,FBtr0085660,FBtr0085661,FBtr0085662,FBtr0085663,FBtr0113483,FBtr0302110,FBtr0302111,FBtr0302112,FBtr0302600,FBtr0302601,FBtr0306685,FBtr0306686,FBtr0306687:chr3R:+:26358335:26404627:tmod:2:	ALE	E2,E3	E2,E8	0.866811	-0.0822381	-0.949049	0.00318309	0.0394171	0.959016	0.895696	0.0633198
Tom70	FBtr0080309,FBtr0080310,FBtr0080311:chr2L:-:12035994:12038543:Tom70::5-6>	AFE	E1,E5	E3,E4,E5	3.68958	1.63734	-2.05224	1.10841e-05	0.000756009	0.0267588	0.165015	-0.138256
Tpi	FBtr0085582,FBtr0085583,FBtr0085584:chr3R:-:25958697:25960321:Tpi:<2.3:5-6>	IR	E3,E5	E3,E4,E5	-0.494491	0.355416	0.849907	1.45949e-05	0.000875316	0.281309	0.148702	0.132607
tra	FBtr0075364,FBtr0100244:chr3L:-:16583158:16584150:tra:<1:3-4>	A3SS	E1,E3	E1,E2,E3	-2.00334	-1.46634	0.537005	0.0384491	0.195753	0.619362	0.47879	0.140572
tra2	FBtr0089615,FBtr0089616,FBtr0089617,FBtr0089618,FBtr0089619,FBtr0089620,FBtr0089621:chr2R:-:10489508:10491857:tra2::3	AFE	E1,E3	E2,E3	3.29584	4.38452	1.08869	0.0366638	0.188919	0.39275	0.175897	0.216853
tral	FBtr0075959,FBtr0332635,FBtr0332636,FBtr0332637,FBtr0332638,FBtr0332639,FBtr0332640,FBtr0332641,FBtr0332642:chr3L:+:12508158:12514054:tral:4-5:7	A5SS	E5,E7	E5,E6,E7	-2.26019	-1.77626	0.483934	0.013769	0.107044	0.856585	0.785501	0.0710847
tral	FBtr0075959,FBtr0332635,FBtr0332636,FBtr0332637,FBtr0332638,FBtr0332639,FBtr0332640,FBtr0332641,FBtr0332642:chr3L:+:12508158:12514054:tral:<1-2:4-5	A3SS	E2,E4	E2,E3,E4	0.261215	0.567984	0.306769	0.0585715	0.247718	0.381802	0.31286	0.0689418
Trc8	FBtr0085429,FBtr0085430,FBtr0085431,FBtr0085432,FBtr0333188:chr3R:-:25324746:25329519:Trc8:<2-3-5-6:8-9-10	A3SS	E6,E8	E6,E7,E8	-0.287682	0.606136	0.893818	0.0263927	0.155356	0.518994	0.289946	0.229048
trol	FBtr0091965,FBtr0305158,FBtr0305159,FBtr0305160,FBtr0305161,FBtr0305162,FBtr0305164,FBtr0305168,FBtr0305169,FBtr0305170,FBtr0305172,FBtr0305173,FBtr0305174,FBtr0305175,FBtr0305176,FBtr0308586,FBtr0308587,FBtr0308588:chrX:-:2364492:2439423:trol:<5:7-8-14	ES	E5,E7	E5,E6,E7	0.78714	1.2444	0.457259	0.0268979	0.156418	0.121249	0.075891	0.0453585
trol	FBtr0091965,FBtr0305158,FBtr0305159,FBtr0305160,FBtr0305161,FBtr0305162,FBtr0305164,FBtr0305168,FBtr0305169,FBtr0305170,FBtr0305172,FBtr0305173,FBtr0305174,FBtr0305175,FBtr0305176,FBtr0308586,FBtr0308587,FBtr0308588:chrX:-:2364492:2439423:trol:7-8-14:19	ES	E14,E19	E14,E15,E18,E19	-3.76352	-3.02159	0.741937	0.049634	0.224534	0.887566	0.762798	0.124768
Trp1	FBtr0079931,FBtr0079932,FBtr0305986:chr2L:+:10009385:10013170:Trp1::3-4	AFE	E1,E3	E2,E3	-0.467896	-0.0706073	0.397289	0.000678417	0.0137507	0.549211	0.450286	0.0989249
Trp1	FBtr0079931,FBtr0079932,FBtr0305986:chr2L:+:10009385:10013170:Trp1:3-4:	ALE	E4,E5	E4,E6	-1.75759	-2.0311	-0.273507	0.0578698	0.245874	0.388245	0.325362	0.0628825
Trx-2	FBtr0079839,FBtr0079840:chr2L:+:9613164:9616048:Trx-2:<1:3-4-5>	A3SS	E1,E3	E1,E2,E3	-1.76073	-1.1319	0.628831	0.047914	0.220899	0.734352	0.595083	0.139269
tsl	FBtr0084164,FBtr0084165:chr3R:-:17603835:17608256:tsl:<1:	ALE	E1,E2	E1,E3,E4	-2.07945	-3.01897	-0.939517	0.0579066	0.245874	0.256407	0.1143	0.142106
Tsp29Fb	FBtr0079755,FBtr0079756,FBtr0273420:chr2L:+:8937389:8939746:Tsp29Fb:<1.2:6-7-8-9>	IR	E2,E6	E2,E3,E4,E5,E6	-0.777874	-0.203979	0.573895	6.16754e-05	0.00254602	0.39396	0.273252	0.120707
Tsp74F	FBtr0075154,FBtr0075155:chr3L:-:17884919:17888962:Tsp74F:<1-2:4-5-6-7-8>	ES	E2,E4	E2,E3,E4	-0.988611	-1.28577	-0.297158	0.0506848	0.227978	0.456802	0.541716	-0.084914
tutl	FBtr0089268,FBtr0089269,FBtr0089270,FBtr0089271,FBtr0301863,FBtr0301864,FBtr0333484,FBtr0333485:chr2L:+:4283147:4323781:tutl:4-5-6-7-8-11-12:14	ES	E12,E14	E12,E13,E14	-2.90311	-6.36303	-3.45992	5.03767e-06	0.000424448	0.870813	0.994754	-0.123941
Ucrh	FBtr0301783,FBtr0301784,FBtr0301785,FBtr0333873:chr3LHet:+:606164:607415:Ucrh:<1.2:5-6.7>	A5SS	E2,E5	E2,E3,E5	-1.85272	-2.25427	-0.401545	0.0237688	0.146324	0.815619	0.868591	-0.0529728
uex	FBtr0302226,FBtr0302227:chr2RHet:-:3136908:3181390:uex:3:5	IR	E3,E5	E3,E4,E5	-0.946342	-0.238285	0.708058	0.00367813	0.0434589	0.551432	0.380032	0.171401
Uhg2	FBtr0079906,FBtr0330683:chr2L:-:9893804:9895003:Uhg2:<1-3-4:6>	ES	E4,E6	E4,E5,E6	2.23683	-20	-22.2368	3.58205e-12	3.84802e-09	0.0425337	1	-0.957466
Uhg3	FBtr0081385,FBtr0300249,FBtr0300250:chr2L:+:20647532:20648848:Uhg3:4:	ALE	E4,E5	E4,E6,E7	-1.59601	-2.97553	-1.37951	4.90253e-05	0.00214961	0.127583	0.0359992	0.0915839
unc-13	FBtr0089245,FBtr0089246,FBtr0089247,FBtr0308805,FBtr0308806:chr4:-:889295:925419:unc-13::14-15-16-17-18-19-20	AFE	E13,E14	E9,E10,E11,E12,E14	-2.86159	-2.31229	0.549299	0.00393838	0.045405	0.782896	0.671551	0.111345
unc-13	FBtr0089245,FBtr0089246,FBtr0089247,FBtr0308805,FBtr0308806:chr4:-:889295:925419:unc-13:14-15-16-17-18-19-20:24-25-26-27-28.29.30>	ES	E20,E24	E20,E21,E22,E23,E24	-5.32516	-20	-14.6748	0.0308083	0.168856	0.940833	1	-0.0591668
up	FBtr0073851,FBtr0073852,FBtr0073853,FBtr0100561,FBtr0100563,FBtr0301919,FBtr0301920,FBtr0301921,FBtr0301922,FBtr0301923,FBtr0308233,FBtr0308234,FBtr0310136,FBtr0310137,FBtr0310138:chrX:-:13487506:13496536:up:11:13-14-15-17-18.19>	A5SS	E11,E13	E11,E12,E13	-1.58748	-1.39471	0.19277	0.0023898	0.0326602	0.821453	0.790174	0.031279
wah	FBtr0301726,FBtr0301727,FBtr0301728,FBtr0301730,FBtr0301731,FBtr0301732,FBtr0309859,FBtr0309860,FBtr0309861,FBtr0309862,FBtr0309863:chr3R:+:11619497:11627647:wah:<1.2.3.4.5:10-11-12-13	A5SS	E5,E10	E5,E6,E7,E8,E10	-1.54675e-09	0.641854	0.641854	0.0376457	0.192576	0.249886	0.146888	0.102998
vap	FBtr0074140,FBtr0074141,FBtr0074142,FBtr0074143:chrX:-:15894166:15899877:vap:2:5	IR	E2,E5	E2,E3,E4,E5	-3.4095	-2.3254	1.0841	0.0467326	0.218982	0.88421	0.72278	0.16143
vari	FBtr0089945,FBtr0089946,FBtr0089947:chr2L:-:20788658:20797040:vari::4-5.6-7-8-9-10-11-12>	AFE	E1,E2,E4	E3,E4	0.527574	0.839433	0.311859	0.0436688	0.21155	0.33502	0.411062	-0.0760424
wb	FBtr0302731,FBtr0302732,FBtr0302733,FBtr0302734,FBtr0302735,FBtr0305063:chr2L:+:14263026:14328262:wb:10-11-12-13-14-15-16-17:	ALE	E17,E18	E17,E19,E20,E21,E22	-3.46814	-4.53689	-1.06875	0.0328001	0.175301	0.0816312	0.029091	0.0525402
Wbp2	FBtr0273240,FBtr0273241,FBtr0332045,FBtr0332046,FBtr0332047,FBtr0332048:chr3L:+:12843259:12846269:Wbp2:<1-2-3:7	ES	E3,E7	E4,E6,E7	-3.68309	-2.32728	1.35582	0.0273248	0.157182	0.799697	0.483863	0.315834
VGlut	FBtr0077769,FBtr0307078,FBtr0331202:chr2L:+:2391659:2410662:VGlut::4-5-6-7-8-9-10-11>	AFE	E2,E4	E3,E4	-0.770108	-1.58853	-0.818423	0.0190938	0.128681	0.372017	0.561264	-0.189248
Vha100-1	FBtr0085374,FBtr0085375,FBtr0085376,FBtr0085377,FBtr0085378,FBtr0085379,FBtr0085380,FBtr0085381,FBtr0301650,FBtr0301651:chr3R:+:24956771:24963702:Vha100-1:11-12-13:15-16-17.18>	ES	E13,E15	E13,E14,E15	2.31024	1.18679	-1.12345	0.00643779	0.0625864	0.0794669	0.212277	-0.13281
Vha55	FBtr0082670,FBtr0082671,FBtr0301661:chr3R:-:8449483:8453551:Vha55:<1.2.3:5	IR	E3,E5	E3,E4,E5	1.3598	3.05482	1.69502	4.97054e-14	1.06792e-10	0.099553	0.0193369	0.0802161
VhaAC45	FBtr0088587,FBtr0088588:chr2R:+:5095066:5097169:VhaAC45:<2:4-5-6-7>	IR	E2,E4	E2,E3,E4	-0.380666	-0.15332	0.227346	0.0297539	0.165827	0.342902	0.290152	0.0527494
vig	FBtr0080718,FBtr0080719,FBtr0080720,FBtr0080721:chr2L:-:15062930:15070316:vig:<2:5-6-7.8>	A5SS	E2,E5	E2,E3,E4,E5	-4.13574	-3.4443	0.691435	0.00312145	0.0387655	0.959396	0.922473	0.0369229
vig2	FBtr0084775,FBtr0084776,FBtr0084777,FBtr0113354:chr3R:+:20949094:20951341:vig2:<2.3.4:	ALE	E4,E5	E4,E6,E7,E8	-0.0210605	-0.458338	-0.437278	6.63e-05	0.00263788	0.909747	0.866129	0.0436182
vir-1	FBtr0080389,FBtr0080390,FBtr0080391,FBtr0100125,FBtr0305263,FBtr0305264:chr2L:-:12403269:12423421:vir-1::4-5-6-7	AFE	E1,E4	E2,E3,E4	1.57554	1.10343	-0.472105	0.0241662	0.147894	0.374493	0.487507	-0.113013
wls	FBtr0076218,FBtr0076219:chr3L:-:11159719:11162725:wls:<1:3>	ES	E1,E3	E1,E2,E3	2.4188e-09	1.58697	1.58697	0.000242358	0.00659123	0.256515	0.0728875	0.183627
Vmat	FBtr0091491,FBtr0091492,FBtr0091493,FBtr0310062:chr2R:-:9400636:9421910:Vmat:3-5-6-7-8-9-10:	ALE	E10,E11	E10,E12,E13	-3.53354	-1.87772	1.65582	0.000597028	0.012649	0.332971	0.6962	-0.363229
Vmat	FBtr0091491,FBtr0091492,FBtr0091493,FBtr0310062:chr2R:-:9400636:9421910:Vmat::3-5-6-7-8-9-10	AFE	E1,E3	E2,E3	-1.09861	0.339868	1.43848	0.00523929	0.0546812	0.742063	0.414094	0.327969
wnd	FBtr0074963,FBtr0074964,FBtr0074965,FBtr0302513:chr3L:-:19617505:19628883:wnd:4:6	A5SS	E4,E6	E4,E5,E6	-1.4761	-0.446499	1.0296	0.0256739	0.153864	0.790628	0.556749	0.23388
woc	FBtr0085178,FBtr0112857,FBtr0308502:chr3R:-:23082314:23089758:woc:<1-2-3:5-7-8-9-10-11-12-13.14>	ES	E3,E5	E3,E4,E5	0.468136	-0.179971	-0.648108	0.00510767	0.0541318	0.250837	0.385521	-0.134685
Vrp1	FBtr0071791,FBtr0071792,FBtr0071793,FBtr0071794,FBtr0071795,FBtr0071796,FBtr0113104,FBtr0302295,FBtr0302296,FBtr0302297,FBtr0302298:chr2R:-:17994242:18010053:Vrp1::15	AFE	E12,E13,E15	E14,E15	2.01666	1.39032	-0.626337	0.000198858	0.00573485	0.62261	0.464749	0.157861
vsg	FBtr0076398,FBtr0076399,FBtr0076400,FBtr0076401,FBtr0330097:chr3L:+:9707423:9710816:vsg:<1:3	IR	E1,E3	E1,E2,E3	0.254769	0.746396	0.491627	0.00545641	0.0560322	0.196062	0.131452	0.0646108
Wwox	FBtr0079550:chr2L:-:7999669:8004313:Wwox:<1-2-3:5-6>	ES	E3,E5	E3,E4,E5	-20	-2.47018	17.5298	0.000451828	0.0106093	1	0.765314	0.234686
yar	FBtr0303213,FBtr0308354,FBtr0308355,FBtr0308356,FBtr0308357,FBtr0308358,FBtr0308359,FBtr0308360:chrX:+:256431:261105:yar::8	AFE	E1,E2,E3,E4,E8	E5,E6,E7,E8	-0.0803097	0.306074	0.386384	0.0466862	0.218982	0.518882	0.427679	0.0912026
YT521-B	FBtr0073078,FBtr0073079:chr3L:-:3370450:3374170:YT521-B:<1:3-4.5>	A5SS	E1,E3	E1,E2,E3	-2.73836	-2.249	0.489355	0.0555042	0.240541	0.822126	0.750139	0.0719872
zip	FBtr0072398,FBtr0072399,FBtr0100466,FBtr0100467,FBtr0302572,FBtr0302573,FBtr0302574,FBtr0302575,FBtr0306576:chr2R:-:20878092:20899488:zip:<2:5-6-7-8-9	A5SS	E2,E5	E2,E3,E5	0.575364	0.83525	0.259885	0.00547673	0.0560322	0.196096	0.154105	0.0419914
zormin	FBtr0332114,FBtr0332115,FBtr0332116,FBtr0332117,FBtr0332118,FBtr0332119,FBtr0332120:chr3L:-:2117465:2151700:zormin:19:21-22-23>	ES	E19,E21	E19,E20,E21	-0.627478	-1.41447	-0.786987	0.000506899	0.0112857	0.163203	0.304987	-0.141785
Zyx	FBtr0089210,FBtr0089211,FBtr0089212,FBtr0089213,FBtr0089214,FBtr0089215,FBtr0089216,FBtr0309882,FBtr0309883,FBtr0309884,FBtr0309885:chr4:-:1077990:1084936:Zyx:12-13:16-17.18-19>	A3SS	E13,E16	E13,E14,E15,E16	-3.16358	-3.84922	-0.68564	0.0242856	0.147894	0.876449	0.932342	-0.0558925
CG10082	FBtr0071661,FBtr0071662:chr2R:+:17533681:17545440:CG10082::5-6-7-8-9.10>	AFE	E1,E2,E3,E5	E4,E5	2.54999	3.13023	0.580241	0.0550212	0.239783	0.830614	0.898569	-0.0679548
CG10200	FBtr0087444,FBtr0087445:chr2R:+:10695924:10697436:CG10200:<1:3-4-5>	IR	E1,E3	E1,E2,E3	0.600365	0.954218	0.353852	0.0201321	0.133499	0.164236	0.12032	0.0439154
CG10237	FBtr0081207,FBtr0081208,FBtr0081209,FBtr0308679:chr2L:-:19435843:19442358:CG10237::7-8-9-10>	AFE	E3,E7	E5,E6,E7	-1.73656	-1.4366	0.299965	0.0463838	0.218982	0.767131	0.708944	0.058187
CG10249	FBtr0087429,FBtr0087430,FBtr0087431,FBtr0112929,FBtr0301334,FBtr0303756,FBtr0303757,FBtr0303758,FBtr0332856:chr2R:-:10788979:10815930:CG10249::15-16-17-19-20>	AFE	E12,E13,E15	E14,E15	0.976654	0.565469	-0.411184	0.0115598	0.0953406	0.212751	0.159812	0.0529389
CG10320	FBtr0071663,FBtr0113101,FBtr0113102,FBtr0300679,FBtr0300680:chr2R:+:17545579:17546282:CG10320::4	AFE	E1,E4	E2,E4	1.22202	0.572306	-0.649717	0.000649921	0.0133199	0.0619983	0.114638	-0.0526401
CG10359	FBtr0273204,FBtr0290290:chr3L:+:3612191:3615244:CG10359:<1-2-3:5-6>	A5SS	E3,E5	E3,E4,E5	-0.70557	0.405465	1.11103	9.28398e-05	0.00332685	0.43896	0.210185	0.228775
CG10543	FBtr0071524,FBtr0303195,FBtr0332593,FBtr0332594:chr2R:+:16883724:16895245:CG10543:<1.2-4-5-6-7-8:10.11>	A3SS	E8,E10	E8,E9,E10	1.27766	2.28578	1.00812	0.037396	0.191755	0.217087	0.0934145	0.123673
CG10550	FBtr0084857,FBtr0084858,FBtr0305953:chr3R:-:21132128:21134109:CG10550::4-5-6>	AFE	E1,E2,E4	E3,E4	2.24083	-1.0052	-3.24603	4.56328e-05	0.00202149	0.948128	0.52364	0.424488
CG10732	FBtr0075851,FBtr0075852,FBtr0331533,FBtr0331534:chr3L:+:13435693:13442345:CG10732::3-4-5-6	AFE	E1,E3	E2,E3	-1.54835	-2.34341	-0.795057	0.0105076	0.0900624	0.90832	0.960476	-0.0521557
CG10737	FBtr0086585,FBtr0086586,FBtr0086588,FBtr0100282,FBtr0290311,FBtr0290312,FBtr0290313,FBtr0290314,FBtr0290315,FBtr0290316,FBtr0290317,FBtr0290318:chr2R:+:15051651:15065728:CG10737:5-6-7-8-9-11-12:14	ES	E12,E14	E13,E14	-1.45691	-1.96685	-0.509941	0.055535	0.240541	0.735897	0.821742	-0.0858452
CG11050	FBtr0079291,FBtr0079292,FBtr0079293:chr2L:+:6611022:6617117:CG11050::4-5-6-7>	AFE	E1,E4	E2,E4	2.66259	1.5329	-1.12969	0.0530958	0.23411	0.0821479	0.206132	-0.123984
CG11148	FBtr0300882,FBtr0300883,FBtr0300884,FBtr0300885,FBtr0300886:chr4:-:876025:887652:CG11148:<1:4	A5SS	E1,E4	E1,E2,E4	-0.0598981	-0.47184	-0.411942	0.0590425	0.248002	0.486204	0.583253	-0.097049
CG11151	FBtr0073819,FBtr0331719:chrX:+:13633776:13635985:CG11151:<2:4-5.6-7>	IR	E2,E4	E2,E3,E4	-0.0816989	0.733103	0.814802	2.53928e-05	0.00128368	0.278832	0.151914	0.126918
CG11155	FBtr0089194,FBtr0089195,FBtr0333701:chr4:+:1147227:1158545:CG11155:5-6-7-8-9-10-11:13	ES	E11,E13	E11,E12,E13	-0.784955	0.074108	0.859063	0.00111783	0.0194309	0.167669	0.0810951	0.0865739
CG11248	FBtr0078430,FBtr0078431,FBtr0333967:chr3L:+:21673149:21676331:CG11248:2:4-5-6>	A5SS	E2,E4	E2,E3,E4	-1.28093	0.597837	1.87877	0.00492484	0.0530985	0.759465	0.321263	0.438202
CG11266	FBtr0089634,FBtr0089635,FBtr0089636,FBtr0089637,FBtr0089638,FBtr0089639,FBtr0089640:chr2L:+:7032712:7037916:CG11266:<2.3:5	IR	E3,E5	E3,E4,E5	-1.26411	-0.684948	0.579166	0.0015196	0.023831	0.605835	0.456806	0.149029
CG11334	FBtr0085808,FBtr0085809:chr3R:-:27285543:27288730:CG11334::3-4-5-6-7>	AFE	E1,E3	E2,E3	1.61424	1.96582	0.351579	0.0223696	0.141564	0.197829	0.147241	0.0505875
CG11455	FBtr0078117,FBtr0078118,FBtr0301886,FBtr0301887,FBtr0301888,FBtr0306542,FBtr0330638,FBtr0330639,FBtr0330640,FBtr0330641,FBtr0330642:chr2L:+:114725:156030:CG11455:<5.6:11.12-13>	IR	E6,E11	E6,E7,E8,E9,E10,E11	0.495839	-0.322395	-0.818234	1.97675e-06	0.000212352	0.141245	0.269054	-0.127808
CG11486	FBtr0072991,FBtr0072992,FBtr0072993,FBtr0072994,FBtr0072995,FBtr0072996,FBtr0072998,FBtr0072999,FBtr0073000,FBtr0073001,FBtr0073002,FBtr0073003,FBtr0113129,FBtr0113130,FBtr0113131,FBtr0332113:chr3L:+:3071132:3090406:CG11486:<5:8.9	A5SS	E5,E8	E6,E8	0.167054	-20	-20.1671	0.00180086	0.0269164	0.269727	1	-0.730273
CG11486	FBtr0072991,FBtr0072992,FBtr0072993,FBtr0072994,FBtr0072995,FBtr0072996,FBtr0072998,FBtr0072999,FBtr0073000,FBtr0073001,FBtr0073002,FBtr0073003,FBtr0113129,FBtr0113130,FBtr0113131,FBtr0332113:chr3L:+:3071132:3090406:CG11486:<1:	ALE	E1,E2,E3,E4	E1,E8,E9	-1.78712	-2.71586	-0.928744	0.0020604	0.0295624	0.366181	0.182714	0.183467
CG11597,CG5946	FBtr0076078,FBtr0076079,FBtr0076080,FBtr0110780,FBtr0110868,FBtr0110869,FBtr0301135,FBtr0302136,FBtr0302137:chr3L:-:11810082:11815375:CG11597,CG5946::10-11-14.15>	AFE	E1,E5,E10	E9,E10	-0.489756	-1.11106	-0.621305	0.0204124	0.134322	0.209891	0.137343	0.0725476
CG1161	FBtr0078785,FBtr0100434:chr3R:+:1180821:1182467:CG1161:<1-2-3-4:	ALE	E4,E5	E4,E6	-1.27953	-0.735543	0.543984	0.00413811	0.0470409	0.45424	0.588611	-0.134371
CG11658	FBtr0076124,FBtr0076125,FBtr0076126,FBtr0076127,FBtr0076128:chr3L:-:11692595:11701653:CG11658:2:6-7-8-9.10>	A5SS	E2,E6	E2,E3,E4,E6	-1.75849	-0.397342	1.36115	0.0018445	0.0273304	0.67423	0.36104	0.313191
CG11695	FBtr0073513,FBtr0300872:chrX:+:11470915:11472839:CG11695:<1-2:4-5>	IR	E2,E4	E2,E3,E4	-0.111226	0.76214	0.873366	0.0577025	0.245874	0.334918	0.172696	0.162222
CG11760,CG8116	FBtr0081905,FBtr0081907,FBtr0300543,FBtr0300544:chr3R:+:4541955:4547050:CG11760,CG8116:<1:3-4	A3SS	E1,E3	E1,E2,E3	-1.52408	-2.55086	-1.02679	0.00710096	0.0663322	0.806249	0.929506	-0.123256
CG11876	FBtr0085366,FBtr0085367,FBtr0085368,FBtr0085369:chr3R:+:24938792:24941919:CG11876:<1.2:4-5	IR	E2,E4	E2,E3,E4	0.872749	1.28168	0.408929	0.00235813	0.0325816	0.14958	0.103512	0.0460679
CG11905	FBtr0075300,FBtr0075301,FBtr0075302,FBtr0075303,FBtr0075304,FBtr0075305,FBtr0075306,FBtr0113173,FBtr0113174,FBtr0305576,FBtr0305577:chr3L:-:16921480:16928636:CG11905:2.3:5-6	IR	E3,E5	E3,E4,E5	-5.96871	0.282232	6.25094	1.3421e-10	9.61171e-08	0.994782	0.252801	0.741981
CG12006	FBtr0073149,FBtr0073150:chr3L:+:3811262:3813958:CG12006:<1-2-3-4-5:7>	IR	E5,E7	E5,E6,E7	-3.37666	-2.5445	0.832158	0.0337499	0.177943	0.909115	0.815839	0.0932759
CG12054	FBtr0085758,FBtr0113312,FBtr0305118,FBtr0305119:chr3R:+:27046425:27056645:CG12054:<1-2-5-6-7-8:	ALE	E8,E10,E11	E8,E9	0.262492	0.882021	0.619529	0.0353335	0.183811	0.453183	0.578046	-0.124863
CG12065	FBtr0071214,FBtr0071215,FBtr0071216,FBtr0071217,FBtr0300750,FBtr0300751:chrX:+:8468336:8482561:CG12065:5-6:8-9	ES	E6,E8	E6,E7,E8	-0.299243	-0.801361	-0.502118	0.00229001	0.0318453	0.337098	0.456409	-0.11931
CG12084	FBtr0072711,FBtr0332656:chr3L:-:1490950:1496643:CG12084:<1-2-3-4-5-6-7:9-10.11>	IR	E7,E9	E7,E8,E9	-1.39786	-0.622943	0.774912	0.00171327	0.0263868	0.598527	0.415358	0.183169
CG1246	FBtr0072938,FBtr0303022,FBtr0333446:chr3L:+:2648047:2650205:CG1246::4-5-6-7-8>	AFE	E1,E4	E3,E4	0.909557	-0.143101	-1.05266	3.06347e-08	7.15295e-06	0.170505	0.370957	-0.200452
CG1246	FBtr0072938,FBtr0303022,FBtr0333446:chr3L:+:2648047:2650205:CG1246:<1:	ALE	E1,E2	E1,E4,E5,E6,E7,E8	-4.46761	-3.67178	0.795835	0.0263386	0.155356	0.416402	0.613717	-0.197315
CG12788,Tim9b	FBtr0074766,FBtr0074767,FBtr0100291,FBtr0332486,FBtr0332487:chrX:-:19510695:19512570:CG12788,Tim9b:<1:3-4.5.6>	A3SS	E1,E3	E1,E2,E3	-2.83773	-2.15948	0.678244	0.0466605	0.218982	0.891642	0.811452	0.0801902
CG12814	FBtr0110786,FBtr0306090:chr3R:-:5996877:6015315:CG12814:<1-2-3:5-6-7-8-9-10-11	A5SS	E3,E5	E3,E4,E5	-1.63445	-20	-18.3655	0.0304978	0.168012	0.793244	1	-0.206756
CG13101	FBtr0079783,FBtr0079784:chr2L:-:8977833:8984872:CG13101:<1:3-4-5-6-7-8>	A5SS	E1,E3	E1,E2,E3	-1.63156	1.40412	3.03569	2.43307e-06	0.000243138	0.692803	0.107491	0.585312
CG1317	FBtr0072901,FBtr0300773:chr3L:-:2368013:2371939:CG1317:<1-2:4>	IR	E2,E4	E2,E3,E4	0.40317	-0.00508743	-0.408258	0.0366671	0.188919	0.11388	0.162737	-0.0488571
CG13319	FBtr0087788,FBtr0300890:chr2R:+:8811408:8812169:CG13319:<1:	ALE	E1,E2	E1,E3	-1.26851	-2.91777	-1.64926	0.0479633	0.220899	0.942854	0.815124	0.12773
CG13349	FBtr0087610,FBtr0087611,FBtr0114493,FBtr0114494,FBtr0114495:chr2R:-:9846032:9847909:CG13349:4-5:7>	IR	E5,E7	E5,E6,E7	-1.40521	-0.701355	0.703856	8.06498e-05	0.00299147	0.564042	0.389093	0.17495
CG13551	FBtr0072033,FBtr0072034,FBtr0072035:chr2R:-:19265382:19270944:CG13551::5.6-7-8>	AFE	E1,E5	E2,E3,E5	2.73487	2.32778	-0.407084	0.024806	0.149497	0.113352	0.167633	-0.0542805
CG1358	FBtr0088948,FBtr0088949,FBtr0088950,FBtr0303287:chr2R:-:3483239:3508216:CG1358::8-9-10-11-12-13-14-15-16>	AFE	E1,E2,E8	E5,E8	1.57819	3.23868	1.66049	0.0140075	0.107483	0.884675	0.98217	-0.0974951
CG13585	FBtr0072303,FBtr0072304,FBtr0300488,FBtr0300489:chr2R:+:20419122:20420915:CG13585:<1.2:7-8-9>	A5SS	E2,E7	E2,E3,E7	-1.9865	-2.23194	-0.24544	0.0382868	0.195162	0.707705	0.756077	-0.0483718
CG13707	FBtr0306799,FBtr0308821,FBtr0308822:chr3L:-:4837790:4840108:CG13707::5>	AFE	E1,E2,E5	E4,E5	0.719437	20	19.2806	0.0109181	0.0927176	0.645844	1	-0.354156
CG13784	FBtr0079414,FBtr0110799,FBtr0330197,FBtr0330198,FBtr0330199:chr2L:-:7204797:7220029:CG13784:<1.2.3:5-7-8.9-10-11-12>	IR	E3,E5	E3,E4,E5	-1.73957	-2.67631	-0.936739	0.0138258	0.107044	0.260191	0.561655	-0.301463
CG13900	FBtr0072597,FBtr0072598,FBtr0331404,FBtr0331405:chr3L:-:826719:833402:CG13900:<1-3-4-5-6:8-10-11-12-13-14-15>	ES	E6,E8	E6,E7,E8	-0.769237	-1.22923	-0.459995	0.000255929	0.00691653	0.403543	0.518716	-0.115173
CG13917	FBtr0072747,FBtr0303993,FBtr0333359:chr3L:+:1576698:1600846:CG13917:<1-4-5-6:	ALE	E6,E7	E6,E8,E9	-1.05605	-1.8045	-0.748446	0.0269621	0.156534	0.82924	0.667415	0.161825
CG13937	FBtr0300714,FBtr0300715,FBtr0300716,FBtr0300717,FBtr0332669,FBtr0332670:chr3L:-:1876550:1883041:CG13937:<1:4	A3SS	E1,E4	E1,E3,E4	-0.34484	-1.1474	-0.802562	0.049641	0.224534	0.546209	0.737551	-0.191342
CG1407	FBtr0088435,FBtr0088436,FBtr0300719,FBtr0330325:chr2R:-:5915947:5920393:CG1407:<1-2-3-4:6-7	IR	E4,E6	E4,E5,E6	-0.714201	-0.230524	0.483677	0.0386197	0.196157	0.341066	0.227201	0.113865
CG14117	FBtr0306091,FBtr0332074:chr3L:+:13001384:13002550:CG14117:<1-2:4>	A5SS	E2,E4	E2,E3,E4	3.3673	1.0116	-2.35569	0.00500655	0.0535938	0.0273133	0.253394	-0.226081
CG1416	FBtr0085903,FBtr0085904,FBtr0085905:chr2L:+:21758009:21761000:CG1416:<1.2:4-5-6-7>	IR	E2,E4	E2,E3,E4	-2.12732	-0.994338	1.13299	5.56456e-07	7.03262e-05	0.792298	0.545369	0.246928
CG14257	FBtr0299564,FBtr0331702:chr3R:+:22901591:22908540:CG14257:<1-2-3-4:6>	A3SS	E4,E6	E4,E5,E6	-1.84919	-0.448799	1.40039	0.000287054	0.00758635	0.21064	0.0598659	0.150774
CG14275	FBtr0079602,FBtr0079603:chr2L:+:8327455:8332911:CG14275::3-4>	AFE	E1,E3	E2,E3	-1.9741	-1.1993	0.774793	0.00657289	0.0637555	0.876227	0.766585	0.109641
CG14395	FBtr0300769,FBtr0300770,FBtr0310613:chr3R:+:8488552:8499681:CG14395::4.5-6-7-8-9-10-11>	AFE	E1,E4	E3,E4	-2.16268	-1.57097	0.591713	0.0160497	0.117056	0.938679	0.889121	0.049558
CG1440	FBtr0071197,FBtr0112961,FBtr0112962:chrX:+:8331112:8334969:CG1440::4-5-6-7>	AFE	E1,E4	E2,E3,E4	1.70199	1.29135	-0.410643	0.0124693	0.101287	0.0896293	0.123973	-0.0343436
CG14683,pug	FBtr0082264,FBtr0082265,FBtr0082266,FBtr0082267,FBtr0100144,FBtr0305662:chr3R:+:6522239:6529038:CG14683,pug::8-9-10-11-12>	AFE	E2,E8	E6,E7,E8	0.52026	0.181802	-0.338457	0.00381032	0.0443711	0.505368	0.588767	-0.0833983
CG14741	FBtr0300351,FBtr0307015,FBtr0307016,FBtr0307017:chr3R:-:7894963:7916334:CG14741:<1-2-5-6-7-8-9-11-12-13-14-15:17-18-19-20-21-22-23>	A5SS	E15,E17	E15,E16,E17	-1.44692	-0.371564	1.07536	0.0229618	0.143411	0.695396	0.436111	0.259285
CG14879	FBtr0083325,FBtr0083326:chr3R:-:12171854:12174946:CG14879:<1-2:4>	IR	E2,E4	E2,E3,E4	-1.86587	-3.04452	-1.17865	0.0323703	0.173869	0.689563	0.878606	-0.189043
CG14968	FBtr0073086,FBtr0073087,FBtr0073088,FBtr0073089,FBtr0073090:chr3L:-:3299335:3303112:CG14968:<3.4.5:	ALE	E5,E6	E5,E7,E8	-3.6958	-3.27537	0.420426	0.0449658	0.215405	0.216636	0.292746	-0.07611
CG15118	FBtr0086589,FBtr0086590,FBtr0086591,FBtr0086592,FBtr0113096:chr2R:-:15021221:15031646:CG15118:<3:6-8-9-10-11-12	IR	E3,E6	E3,E4,E5,E6	-4.39445	-2.75317	1.64128	0.0111089	0.0933802	0.974665	0.882279	0.0923854
CG1516,cbx	FBtr0088452,FBtr0088453,FBtr0088454,FBtr0088455,FBtr0088456,FBtr0088457,FBtr0088458,FBtr0088459,FBtr0088460,FBtr0088461,FBtr0088462,FBtr0300850,FBtr0304158,FBtr0332915:chr2R:-:5738207:5762577:CG1516,cbx:16-19-20:22-23-24>	ES	E20,E22	E20,E21,E22	-1.07223	0.826679	1.8989	5.33444e-07	6.94609e-05	0.596154	0.182516	0.413638
CG1516,cbx	FBtr0088452,FBtr0088453,FBtr0088454,FBtr0088455,FBtr0088456,FBtr0088457,FBtr0088458,FBtr0088459,FBtr0088460,FBtr0088461,FBtr0088462,FBtr0300850,FBtr0304158,FBtr0332915:chr2R:-:5738207:5762577:CG1516,cbx:<13.14:16-19-20	IR	E14,E16	E14,E15,E16	-1.9659	-1.09322	0.872674	6.773e-06	0.000519707	0.741829	0.546142	0.195687
CG15279	FBtr0080685,FBtr0080686,FBtr0300845:chr2L:-:14844992:14851749:CG15279::7-8-9>	AFE	E3,E4,E5,E7	E6,E7	2.42095	4.61349	2.19254	0.00251188	0.0337299	0.816883	0.980011	-0.163128
CG15432	FBtr0077438,FBtr0331434,FBtr0331435:chr2L:+:4442319:4442985:CG15432::4>	AFE	E2,E4	E3,E4	-3.40536	-1.78219	1.62317	0.000892363	0.0166919	0.943821	0.755748	0.188073
CG15881	FBtr0074879,FBtr0074880:chr3L:+:19798280:19800032:CG15881:<2:4-5-6>	IR	E2,E4	E2,E3,E4	0.980829	1.59215	0.611317	0.0202985	0.133918	0.135671	0.076319	0.0593517
CG1632	FBtr0071170,FBtr0307282:chrX:+:8146704:8166495:CG1632:<1:3-4-5-6-7-8-9-10>	IR	E1,E3	E1,E2,E3	-4.86907	-2.7258	2.14327	0.0296697	0.165572	0.976092	0.787505	0.188587
CG1674	FBtr0089116,FBtr0089119,FBtr0300796,FBtr0300797,FBtr0300798,FBtr0300799,FBtr0300800,FBtr0308086,FBtr0308087,FBtr0333671:chr4:+:251355:266529:CG1674:7:9-10-12	ES	E7,E9	E7,E8,E9	2.20167	0.532175	-1.66949	7.97981e-08	1.42872e-05	0.0399943	0.180486	-0.140492
CG1674	FBtr0089116,FBtr0089119,FBtr0300796,FBtr0300797,FBtr0300798,FBtr0300799,FBtr0300800,FBtr0308086,FBtr0308087,FBtr0333671:chr4:+:251355:266529:CG1674:13:18-19-21>	A3SS	E13,E18	E13,E15,E16,E17,E18	-0.705157	-1.06696	-0.361803	0.00957744	0.0839791	0.213779	0.289476	-0.0756974
CG16758	FBtr0072963,FBtr0072964,FBtr0072965,FBtr0072966,FBtr0306577,FBtr0331414:chr3L:-:2499371:2503606:CG16758:<1:	ALE	E1,E5	E1,E6,E7	-3.07192	-2.46928	0.60264	0.0228242	0.143176	0.394032	0.541946	-0.147914
CG16936	FBtr0072436,FBtr0305309,FBtr0305310:chr2R:-:20654240:20655697:CG16936:<1:	ALE	E1,E2,E3	E1,E4,E5,E6	-2.46415	-3.03071	-0.566556	5.93868e-05	0.00247753	0.129788	0.0777871	0.0520005
CG16947	FBtr0079271,FBtr0331186:chr2L:-:6459014:6465669:CG16947:<1:3-4-5-6-7>	A5SS	E1,E3	E1,E2,E3	-1.16949	-2.64655	-1.47706	1.74199e-06	0.000191932	0.690386	0.909915	-0.219528
CG17082	FBtr0111285,FBtr0111287,FBtr0111288,FBtr0111289,FBtr0111290,FBtr0302385:chr2R:+:631835:645548:CG17082:<1:10-11-12-13-14-15-16-17>	ES	E1,E10	E1,E9	1.8718	20	18.1282	0.00259241	0.0345159	0.0373729	0	0.0373729
CG1718	FBtr0306679,FBtr0332488,FBtr0332489:chrX:-:21163334:21177692:CG1718::5>	AFE	E1,E3,E5	E4,E5	-0.500775	2.70805	3.20883	9.17713e-06	0.000657235	0.167028	0.828622	-0.661594
CG17233	FBtr0074850,FBtr0074851,FBtr0302113,FBtr0306326,FBtr0306327,FBtr0306328,FBtr0306329,FBtr0308204:chr3L:-:20226272:20235003:CG17233:10:	ALE	E10,E11,E12	E10,E13,E14,E15,E16,E17,E18,E19,E20	-0.431622	-0.101681	0.329941	0.05312	0.23411	0.771189	0.811893	-0.0407046
CG17322	FBtr0081105,FBtr0081106,FBtr0081107,FBtr0081108:chr2L:+:18826769:18829059:CG17322::5-6-7>	AFE	E1,E5	E4,E5	-1.25276	0.897942	2.1507	0.000681784	0.0137541	0.707047	0.207823	0.499224
CG17323	FBtr0081104,FBtr0308573,FBtr0308574,FBtr0308575:chr2L:+:18823573:18826553:CG17323:<1.2:	ALE	E2,E3,E4	E2,E6,E7,E8,E9	-4.15461	-3.26973	0.884878	0.0152174	0.112862	0.280137	0.486067	-0.20593
CG17352	FBtr0076674,FBtr0076675,FBtr0076676,FBtr0113154:chr3L:-:8345454:8349396:CG17352:<1-2:4-5-6	IR	E2,E4	E2,E3,E4	-0.265367	-1.70157	-1.4362	0.0469356	0.218982	0.362583	0.632068	-0.269485
CG17471	FBtr0100543,FBtr0100544:chr4:-:1213041:1217466:CG17471:<1:3-4-5-6-7-8-9-10-11>	A5SS	E1,E3	E1,E2,E3	-0.440235	0.356675	0.79691	1.67935e-05	0.00094838	0.433402	0.255953	0.177449
CG17490	FBtr0111256,FBtr0111258,FBtr0111259,FBtr0302386,FBtr0332629:chr2L:+:22430961:22441183:CG17490:<2.3.4:6	IR	E4,E6	E4,E5,E6	-2.66723	-1.53687	1.13036	0.019515	0.130364	0.868995	0.683056	0.18594
CG17683	FBtr0111298,FBtr0111299,FBtr0111300,FBtr0111301:chr2R:+:18478:20989:CG17683:3.4:6.7-8.9.10>	IR	E4,E6	E4,E5,E6	0.14449	0.599378	0.454887	0.0374781	0.191947	0.291174	0.205318	0.0858561
CG17724,Kdm4B,seq	FBtr0087770,FBtr0087771,FBtr0100501,FBtr0302052,FBtr0302053,FBtr0302054,FBtr0310498,FBtr0310499,FBtr0330326:chr2R:-:9063598:9085869:CG17724,Kdm4B,seq::14	AFE	E4,E14	E6,E7,E8,E9,E10,E11,E14	-0.0971638	-0.66099	-0.563826	0.00397307	0.045405	0.238291	0.36156	-0.123269
CG17816	FBtr0081770,FBtr0113202,FBtr0113203,FBtr0300826,FBtr0300827,FBtr0333827,FBtr0333828,FBtr0333829:chr3R:-:3681303:3712455:CG17816:5-6-7-8-9:12-13-14-15	A5SS	E9,E10,E12	E9,E12	1.8506	0.676887	-1.17371	0.00262561	0.0346081	0.461345	0.206465	0.25488
CG17816	FBtr0081770,FBtr0113202,FBtr0113203,FBtr0300826,FBtr0300827,FBtr0333827,FBtr0333828,FBtr0333829:chr3R:-:3681303:3712455:CG17816:12-13-14-15:17-18	A5SS	E15,E17	E15,E16,E17	-1.27629	-3.157	-1.88071	0.00578384	0.0578433	0.758961	0.962888	-0.203927
CG17834	FBtr0079686,FBtr0079687,FBtr0079688,FBtr0079689,FBtr0333417,FBtr0333418:chr2L:+:8529140:8541439:CG17834:<1:5-6-7-8	A5SS	E1,E5	E1,E2,E5	-1.17866	-0.280902	0.897753	0.00493048	0.0530985	0.400712	0.213671	0.187041
CG1827	FBtr0088529,FBtr0273243:chr2R:+:5476610:5477948:CG1827:<1.2:4>	IR	E2,E4	E2,E3,E4	0.896746	2.07944	1.1827	0.00836328	0.0750401	0.166221	0.0482283	0.117993
CG18507	FBtr0080527,FBtr0080528,FBtr0331332,FBtr0331333,FBtr0331334:chr2L:+:13665524:13672967:CG18507:6:8>	IR	E6,E8	E6,E7,E8	-3.43399	-2.05017	1.38382	0.0113088	0.0943574	0.765731	0.43967	0.32606
CG18659	FBtr0088626,FBtr0302497,FBtr0302498,FBtr0306381,FBtr0306382,FBtr0308824:chr2R:-:5010808:5019486:CG18659:14:18>	ES	E14,E18	E14,E16,E18	-0.445311	-1.03407	-0.588763	0.039278	0.198096	0.126973	0.208118	-0.0811453
CG18769	FBtr0076970,FBtr0076971,FBtr0076972,FBtr0076973,FBtr0076974,FBtr0307510,FBtr0307511:chr3L:+:6543837:6587040:CG18769:<2:5	A5SS	E2,E5	E3,E5	-1.06471	-2.63906	-1.57435	0.0147897	0.11169	0.629666	0.894362	-0.264696
CG18812	FBtr0088935,FBtr0088936,FBtr0088937,FBtr0306239,FBtr0330327,FBtr0330328:chr2R:-:3604528:3623124:CG18812::15-16-17-18.19.20.21>	AFE	E11,E12,E13,E15	E14,E15	1.07267	1.76127	0.688607	1.48685e-05	0.000875316	0.887341	0.941478	-0.0541369
CG1902,CG30338	FBtr0088531,FBtr0088532,FBtr0088533:chr2R:+:5481551:5493129:CG1902,CG30338::5-6-7>	AFE	E1,E2,E5	E4,E5	1.7821	1.25363	-0.528469	0.000310327	0.00798914	0.884731	0.820524	0.0642075
CG1965	FBtr0081634,FBtr0305315:chr3R:+:2893133:2897346:CG1965:<1.2-3-4-5:7-8-9-10-11>	IR	E5,E7	E5,E6,E7	-3.40654e-09	-0.780159	-0.780159	0.0126352	0.102248	0.252577	0.424899	-0.172322
CG1969	FBtr0085474,FBtr0085475,FBtr0306104,FBtr0310267,FBtr0330296,FBtr0333820,FBtr0333821:chr3R:+:25563996:25567674:CG1969::6-7-8-9.10.11.12.13>	AFE	E1,E2,E3,E6	E4,E5,E6	-0.49126	-0.0113638	0.479897	5.12792e-05	0.00222572	0.874063	0.811362	0.0627003
CG2061	FBtr0073429,FBtr0073430,FBtr0073431,FBtr0332383:chrX:+:10986524:10988980:CG2061:<1.2:	ALE	E2,E3	E2,E4,E6	-0.459532	-1.60944	-1.14991	0.029175	0.163722	0.948211	0.801866	0.146345
CG2177	FBtr0089132,FBtr0089133,FBtr0333681:chr4:-:331555:334713:CG2177:<2:4-5>	A5SS	E2,E4	E2,E3,E4	0.790648	0.185979	-0.604669	0.000549258	0.0120416	0.187024	0.293454	-0.106429
CG2201	FBtr0085921,FBtr0085922,FBtr0085923,FBtr0100511,FBtr0305503:chr2L:-:21614231:21623627:CG2201:<2:4-5-6	A5SS	E2,E4	E2,E3,E4	-1.00086	-0.372847	0.628013	0.00569098	0.0574041	0.333631	0.214556	0.119075
CG2217,CG42740	FBtr0085630,FBtr0303200,FBtr0303201,FBtr0303202:chr3R:-:26244488:26248693:CG2217,CG42740:<1:3-4>	IR	E1,E3	E1,E2,E3	-1.07264	-3.7612	-2.68856	0.000918866	0.0170188	0.495376	0.942878	-0.447501
CG2247	FBtr0073536,FBtr0306133,FBtr0306134,FBtr0306135:chrX:-:11500321:11505682:CG2247:<2-3-4:6-7-8.9-10-11.12>	ES	E4,E6	E4,E5,E6	-3.99053	-1.45089	2.53964	0.02935	0.164429	0.908746	0.48545	0.423296
CG2811	FBtr0072412,FBtr0309243:chr2R:-:20827228:20827993:CG2811:<1-2:4.5>	IR	E2,E4	E2,E3,E4	-2.52733	-1.91091	0.616414	0.0148417	0.111838	0.861508	0.771489	0.090019
CG2865	FBtr0070408,FBtr0332962:chrX:-:2172063:2187444:CG2865:<1:3-4.5>	IR	E1,E3	E1,E2,E3	-3.24843	-2.36712	0.881311	0.0443091	0.213071	0.921128	0.82773	0.0933984
CG2911,Spec2	FBtr0078739,FBtr0078740,FBtr0113194:chr3R:-:1442367:1449810:CG2911,Spec2:<1.2:	ALE	E2,E4	E2,E5,E6	-1.77886	-1.04145	0.737402	0.0156567	0.1152	0.287887	0.453426	-0.165539
CG2930	FBtr0070608,FBtr0070609,FBtr0070610:chrX:+:3766453:3774329:CG2930:<1:3-4-5-6-7>	A5SS	E1,E3	E1,E2,E3	-1.57262	-2.41006	-0.837435	0.000143785	0.00454297	0.715717	0.849209	-0.133492
CG2943	FBtr0081765:chr3R:-:3728974:3733088:CG2943:<1-2-3-4:6-7-8-9-10-11-12-13>	ES	E4,E6	E4,E5,E6	-0.357999	-1.02871	-0.670716	0.000134713	0.00435235	0.501567	0.66165	-0.160084
CG30015	FBtr0088242,FBtr0088243,FBtr0113356,FBtr0113357,FBtr0306393,FBtr0331938,FBtr0331939:chr2R:-:6726606:6762276:CG30015::12-13-14>	AFE	E10,E12	E8,E9,E12	-1.53959	-0.253039	1.28655	6.22138e-05	0.00254602	0.522315	0.240428	0.281887
CG30015	FBtr0088242,FBtr0088243,FBtr0113356,FBtr0113357,FBtr0306393,FBtr0331938,FBtr0331939:chr2R:-:6726606:6762276:CG30015:<1:4-6	A5SS	E1,E4	E1,E2,E3,E4	-0.370566	-1.74702	-1.37646	0.0050139	0.0535938	0.0880333	0.294329	-0.206296
CG30118	FBtr0086724,FBtr0113360,FBtr0113361:chr2R:-:14318030:14327986:CG30118:6-7-8-9-10:12.13>	IR	E10,E12	E10,E11,E12	1.22692	0.635253	-0.591669	0.00437847	0.0490403	0.0410252	0.0728984	-0.0318732
CG3065	FBtr0072153,FBtr0072154,FBtr0072155:chr2R:+:19857829:19859756:CG3065:<1:3	IR	E1,E3	E1,E2,E3	-0.361135	0.103669	0.464805	0.0459229	0.218528	0.396647	0.282937	0.11371
CG31004	FBtr0085779,FBtr0085780,FBtr0300960,FBtr0300961:chr3R:-:27004110:27021484:CG31004:3-4-5-6-7-8-9-10-11-12-13-14-15:17-18>	IR	E15,E17	E15,E16,E17	-2.16891	-0.786303	1.3826	7.51342e-10	3.58724e-07	0.783248	0.476831	0.306417
CG31038	FBtr0085494,FBtr0085495,FBtr0085496,FBtr0085497,FBtr0085498,FBtr0333274,FBtr0333275:chr3R:+:25702780:25728953:CG31038:<1.2:4	IR	E2,E4	E2,E3,E4	-0.550337	0.588417	1.13875	0.00306623	0.0384128	0.096943	0.0338696	0.0630733
CG31038	FBtr0085494,FBtr0085495,FBtr0085496,FBtr0085497,FBtr0085498,FBtr0333274,FBtr0333275:chr3R:+:25702780:25728953:CG31038::9-11>	AFE	E4,E9	E7,E8,E9	0.750533	0.10362	-0.646912	0.0427887	0.208935	0.621482	0.763136	-0.141654
CG3104	FBtr0077686,FBtr0077687:chr2L:-:2849731:2855749:CG3104::3-4-5-6>	AFE	E1,E3	E2,E3	-0.0180185	0.632523	0.650541	0.0122041	0.0999537	0.539434	0.368269	0.171165
CG31064	FBtr0085124,FBtr0085125,FBtr0085126:chr3R:-:23055226:23064803:CG31064::4-5-6	AFE	E1,E4	E2,E3,E4	-1.2792	-2.49466	-1.21547	0.000623687	0.0129468	0.649915	0.860108	-0.210193
CG31145	FBtr0084479,FBtr0084480,FBtr0290056,FBtr0290057:chr3R:-:19431472:19495378:CG31145:<1-2:5-8-9-10-11-12-13-14-15-16-18.19>	ES	E2,E5	E2,E4,E5	-4.3108	-2.62104	1.68976	0.0177559	0.12306	0.978817	0.900344	0.0784725
CG31211	FBtr0082479,FBtr0082480,FBtr0082481:chr3R:+:7775401:7779760:CG31211:<1-2-3-4-5-6-7.8-9:11>	IR	E9,E10,E11	E9,E11	0.567378	0.22555	-0.341827	0.0303524	0.167641	0.461328	0.362481	0.0988469
CG31475	FBtr0083735,FBtr0332539:chr3R:+:15006380:15026818:CG31475:<1:	ALE	E1,E2	E1,E3,E4,E5	-5.273	-3.42182	1.85118	0.0313054	0.171144	0.0394095	0.221175	-0.181765
CG31477	FBtr0082180,FBtr0113408,FBtr0333823:chr3R:+:5947494:5948042:CG31477:<1:3-4>	IR	E1,E3	E1,E2,E3	-0.79493	1.55814	2.35307	0.000201673	0.00577727	0.481533	0.110609	0.370923
CG31522	FBtr0078939,FBtr0078941,FBtr0078942,FBtr0306342,FBtr0306343,FBtr0306344:chr3R:-:267136:288605:CG31522::6-7-8	AFE	E3,E6	E4,E5,E6	-2.36284	-2.6726	-0.309761	0.0258981	0.154133	0.780478	0.828724	-0.0482458
CG31550	FBtr0078684,FBtr0078685,FBtr0113409:chr3R:+:1311253:1315211:CG31550:<1-2:5-6-7-8>	ES	E2,E5	E2,E3,E5	-3.68638	-2.79902	0.887354	0.0253975	0.152421	0.922845	0.828386	0.0944596
CG31619	FBtr0085901,FBtr0085902,FBtr0110959,FBtr0301000,FBtr0307497:chr2L:+:21684102:21729051:CG31619:<1-3-4-5-6-7-8-9-10-11-12-13-14-15-16:	ALE	E16,E17	E16,E18,E19,E20,E21,E22,E23	-0.647477	-1.06033	-0.412853	0.0554492	0.240541	0.880453	0.81975	0.0607033
CG31638	FBtr0079262,FBtr0113411:chr2L:+:6491121:6496986:CG31638:<1-2-3-4-5-6-7:9>	ES	E7,E9	E7,E8,E9	-0.319943	-0.832909	-0.512966	0.0415907	0.204949	0.0910439	0.143788	-0.0527442
CG31855	FBtr0080467,FBtr0290000:chr2L:+:13369192:13370334:CG31855:<1:3>	IR	E1,E3	E1,E2,E3	0.383582	0.849599	0.466017	0.0272814	0.157143	0.231451	0.158413	0.0730381
CG32016	FBtr0089229,FBtr0089231,FBtr0089233,FBtr0310651:chr4:-:972167:979018:CG32016:<1:4-5-6-7-8-9-10-11>	IR	E1,E4	E1,E2,E3,E4	-3.38439	-1.95303	1.43136	0.00112145	0.0194309	0.857828	0.595059	0.262768
CG3209	FBtr0072179,FBtr0302165:chr2R:+:19956432:19961075:CG3209:<1-2-3:6-7.8>	ME	E3,E4,E6	E3,E5,E6	0.434348	0.868856	0.434508	0.00620499	0.0610134	0.601554	0.694267	-0.0927128
CG3214	FBtr0077745,FBtr0273393:chr2L:-:2579216:2580056:CG3214::4-5-6-7>	AFE	E1,E2,E4	E3,E4	0.0466172	0.923658	0.877041	0.000235874	0.00649711	0.597272	0.787696	-0.190424
CG32230	FBtr0070040,FBtr0070041,FBtr0331408:chr3L:+:23332425:23339038:CG32230:<1:3-4-5.6-7>	IR	E1,E3	E1,E2,E3	0.294193	1.23482	0.940626	1.27834e-07	2.19721e-05	0.25022	0.117312	0.132908
CG32280	FBtr0073030,FBtr0073031,FBtr0073032:chr3L:+:3165180:3169080:CG32280:<1:4-5>	A5SS	E1,E4	E1,E2,E4	0.550831	-0.255933	-0.806764	7.56926e-05	0.00287833	0.256271	0.439312	-0.183041
CG32425	FBtr0078202,FBtr0078203,FBtr0078204,FBtr0078205,FBtr0113436:chr3L:+:20490422:20507207:CG32425:5:	ALE	E5,E6	E5,E7,E8,E9	0.426646	-0.195492	-0.622138	0.00227838	0.0317864	0.915808	0.853377	0.0624309
CG32452	FBtr0078523,FBtr0078524:chr3L:+:22710827:22712845:CG32452::3>	AFE	E1,E3	E2,E3	0.884202	1.88031	0.99611	0.0231503	0.144294	0.437444	0.228884	0.20856
CG32521	FBtr0077234,FBtr0077235,FBtr0077236,FBtr0310652,FBtr0310653,FBtr0310654,FBtr0331813,FBtr0331814,FBtr0331815:chrX:-:21076336:21152198:CG32521:<2-3:6-7	ES	E3,E6	E3,E4,E5,E6	1.83671	1.28967	-0.547043	0.0425769	0.208612	0.0631913	0.0975797	-0.0343884
CG32549	FBtr0074570,FBtr0074571,FBtr0074572,FBtr0074573,FBtr0074574,FBtr0074575:chrX:-:18284520:18304168:CG32549::4	AFE	E1,E4	E2,E4	0.559616	1.58412	1.0245	0.016173	0.117391	0.555646	0.288383	0.267263
CG32581	FBtr0074184,FBtr0113439:chrX:-:15690935:15693189:CG32581:<1:	ALE	E1,E2	E1,E3	-0.35361	-5.342	-4.98839	4.8189e-06	0.000414136	0.836191	0.0349537	0.801238
CG3262	FBtr0299874,FBtr0299875:chr2L:+:22239915:22240978:CG3262:<1:3.4>	A3SS	E1,E3	E1,E2,E3	0.252022	-0.202606	-0.454628	0.00462996	0.0510127	0.367886	0.47496	-0.107074
CG32694	FBtr0071410,FBtr0071411,FBtr0071412,FBtr0307380,FBtr0307381,FBtr0307382:chrX:+:9883727:9900915:CG32694:<1-3-4:	ALE	E4,E11,E12,E13,E14,E15	E4,E9,E10	0.194862	0.568697	0.373835	0.0280627	0.160353	0.671143	0.564259	0.106884
CG32795	FBtr0070491,FBtr0070492,FBtr0070493,FBtr0309881:chrX:-:2676938:2684600:CG32795:<3.4:7-8-9-10-11-12-13>	A3SS	E4,E7	E4,E6,E7	0.587787	-0.469317	-1.0571	4.52579e-06	0.000396884	0.196294	0.423236	-0.226942
CG32809	FBtr0089814,FBtr0089815,FBtr0308321,FBtr0308322,FBtr0308323,FBtr0308324,FBtr0330408,FBtr0333117,FBtr0333118,FBtr0333119,FBtr0333120:chrX:-:1567142:1586580:CG32809:4:6-7-8-10-13>	A3SS	E4,E6	E4,E5,E6	-3.4012	-1.20397	2.19722	0.0111265	0.0933802	0.972163	0.759148	0.213015
CG32809	FBtr0089814,FBtr0089815,FBtr0308321,FBtr0308322,FBtr0308323,FBtr0308324,FBtr0330408,FBtr0333117,FBtr0333118,FBtr0333119,FBtr0333120:chrX:-:1567142:1586580:CG32809:<1.2:	ALE	E2,E3	E2,E4	-1.18357	-2.11167	-0.928101	0.0312333	0.170967	0.366311	0.188934	0.177377
CG32813	FBtr0070219,FBtr0070222,FBtr0330317,FBtr0330318,FBtr0330319,FBtr0330320:chrX:+:1274948:1286876:CG32813:9:11.12>	A3SS	E9,E10,E11	E9,E11	-1.40877	-2.53897	-1.13021	0.00451889	0.0501749	0.13357	0.0484718	0.0850979
CG32816	FBtr0070101,FBtr0070102,FBtr0273442,FBtr0273443:chrX:-:210608:364670:CG32816:<4:6-7>	A3SS	E4,E6	E4,E5,E6	-0.350202	0.273293	0.623496	0.0532019	0.23423	0.515935	0.366727	0.149209
CG32944	FBtr0290249,FBtr0290250:chr3R:-:232948:241835:CG32944:<1-3-4-5-6:8-9>	ES	E6,E8	E6,E7,E8	-2.13928	-3.60452	-1.46525	0.0205292	0.134566	0.707325	0.914906	-0.207581
CG32982	FBtr0079771,FBtr0110960,FBtr0301039,FBtr0301040,FBtr0303888,FBtr0330218,FBtr0330219:chr2L:+:9125735:9163721:CG32982::4	AFE	E1,E4	E3,E4	0.246085	1.59553	1.34944	0.00309671	0.0385698	0.58332	0.262091	0.321228
CG33003	FBtr0077434,FBtr0290071:chr2L:+:4400952:4403142:CG33003:<1-2:4>	A5SS	E2,E4	E2,E3,E4	-0.923691	-1.96782	-1.04413	0.0322167	0.173695	0.506831	0.763383	-0.256552
CG33108	FBtr0084504,FBtr0300647:chr3R:+:19821391:19823266:CG33108:<2-3:	ALE	E3,E4	E3,E5,E6	-3.78419	-1.71765	2.06654	0.0206934	0.135342	0.0610712	0.284078	-0.223007
CG33155,mRpL53	FBtr0100285,FBtr0100451,FBtr0100452,FBtr0100453:chr2R:+:9841699:9843169:CG33155,mRpL53::4-5>	AFE	E1,E4	E2,E4	-0.783244	-0.428803	0.354441	0.0152339	0.112862	0.789561	0.72386	0.0657005
CG33170	FBtr0089836,FBtr0299877:chr3L:+:22857699:22860635:CG33170:<1-3-4:7>	A5SS	E4,E7	E4,E5,E7	-0.792051	-0.496083	0.295968	0.0394455	0.198707	0.465443	0.395433	0.0700098
CG33199,CG8229	FBtr0088688,FBtr0290278,FBtr0290279,FBtr0307344:chr2R:-:4835185:4838609:CG33199,CG8229:<1-2:	ALE	E2,E3,E4	E2,E5,E6	-0.260112	-0.953918	-0.693806	0.00931578	0.082197	0.44723	0.289771	0.157458
CG33260,CG42507,Trl	FBtr0075703,FBtr0075704,FBtr0075705,FBtr0075706,FBtr0075707,FBtr0075708,FBtr0100444,FBtr0100445,FBtr0300641,FBtr0300642,FBtr0302436,FBtr0333045,FBtr0333046:chr3L:-:14741028:14754944:CG33260,CG42507,Trl:9:12-13-14-15	A5SS	E9,E10,E11,E12	E9,E12	0.767567	1.14485	0.377281	9.00779e-05	0.00328021	0.207274	0.277363	-0.0700886
CG33260,CG42507,Trl	FBtr0075703,FBtr0075704,FBtr0075705,FBtr0075706,FBtr0075707,FBtr0075708,FBtr0100444,FBtr0100445,FBtr0300641,FBtr0300642,FBtr0302436,FBtr0333045,FBtr0333046:chr3L:-:14741028:14754944:CG33260,CG42507,Trl:16:19	A5SS	E16,E19	E16,E17,E18,E19	-2.08043	-2.53852	-0.458089	0.0242263	0.147894	0.414607	0.527333	-0.112726
CG33298	FBtr0089853,FBtr0089854,FBtr0301064,FBtr0301065:chr2L:+:9495473:9520696:CG33298:2:4-5-6-7-8-9-10-11-12-13-14-15-16-17	IR	E2,E4	E2,E3,E4	-1.43466	-0.550507	0.884155	0.0487883	0.223025	0.293425	0.152913	0.140512
CG33521	FBtr0091470,FBtr0091471,FBtr0091472,FBtr0091473,FBtr0308340,FBtr0308341:chr4:+:1206398:1213320:CG33521:8-9:11-12-13	A5SS	E9,E10,E11	E9,E11	1.08067	1.49327	0.412592	0.0329175	0.175492	0.614216	0.702322	-0.0881054
CG33695,cana	FBtr0091678,FBtr0091679,FBtr0091680,FBtr0091681,FBtr0091682,FBtr0091683:chr2L:+:11269726:11279847:CG33695,cana:<12-15:17>	ES	E15,E17	E15,E16,E17	-1.7168	-2.70805	-0.991254	0.00490189	0.0530985	0.64864	0.829747	-0.181108
CG33713,CG33714	FBtr0077227,FBtr0091702,FBtr0091703,FBtr0091704:chrX:-:21188960:21190299:CG33713,CG33714::3>	AFE	E1,E3	E2,E3	1.27412	1.59949	0.325371	0.024475	0.148544	0.159942	0.121348	0.0385944
CG34126	FBtr0290010,FBtr0329974,FBtr0329975,FBtr0329976,FBtr0329977:chr2L:+:4981613:4992702:CG34126:<1-2-3-4:6-7-8	ES	E4,E6	E4,E5,E6	0.143101	1.12393	0.980829	0.0163181	0.117847	0.347672	0.169824	0.177848
CG34126	FBtr0290010,FBtr0329974,FBtr0329975,FBtr0329976,FBtr0329977:chr2L:+:4981613:4992702:CG34126:6-7-8:10-11-12	A5SS	E8,E10	E8,E9,E10	-3.48636	-2.06978	1.41658	0.0238513	0.146622	0.931524	0.762751	0.168773
CG34355	FBtr0273215,FBtr0273216,FBtr0306734,FBtr0306735:chr3R:+:19646313:19676543:CG34355:<1-2.3-4-6-7-8-9:11-12-13-14-15-16>	ES	E9,E10,E11	E9,E11	-1.51471	-0.175467	1.33924	0.0253872	0.152421	0.130816	0.377238	-0.246422
CG34408	FBtr0071439,FBtr0112675,FBtr0114584,FBtr0114585:chrX:+:10114142:10123948:CG34408:12:14-15-16-17>	A3SS	E12,E14	E12,E13,E14	1.39488	0.467808	-0.92707	0.000572572	0.0123635	0.107656	0.230858	-0.123203
CG34422	FBtr0310365,FBtr0310440:chrX:+:18737695:18749891:CG34422::4-5-6>	AFE	E1,E2,E4	E3,E4	0.786238	1.52606	0.739819	0.0150175	0.111838	0.121992	0.240345	-0.118353
CG3558	FBtr0077644,FBtr0077645,FBtr0273230,FBtr0331653:chr2L:+:2992869:2998726:CG3558:5-6:8-9	A3SS	E6,E8	E6,E7,E8	0.312375	0.869038	0.556663	0.0282064	0.160924	0.329905	0.221809	0.108096
CG3588	FBtr0301058,FBtr0301059,FBtr0301060,FBtr0301061,FBtr0332426:chrX:+:2813802:2818459:CG3588:6:8.9.10.11>	A5SS	E6,E8	E6,E7,E8	1.21302	0.89713	-0.315892	0.0290541	0.16341	0.200881	0.25372	-0.0528387
CG3632	FBtr0112988,FBtr0112989,FBtr0112990,FBtr0112991:chrX:+:16190727:16197341:CG3632:6-7-8-9-10-11-12-13-14-15-16-17-18:20>	ES	E18,E20	E18,E19,E20	-3.8712	-2.63428	1.23692	0.0240393	0.147357	0.910746	0.73702	0.173726
CG3683	FBtr0072324,FBtr0072325,FBtr0072326,FBtr0301036:chr2R:+:20551920:20552962:CG3683:<3.4:6	A5SS	E4,E6	E5,E6	-0.693147	-0.198954	0.494193	0.00293032	0.0373637	0.624271	0.502629	0.121642
CG3714	FBtr0077479,FBtr0077480,FBtr0077481,FBtr0077482,FBtr0077483,FBtr0113020:chr2L:-:4189496:4198058:CG3714:<1:6-7-8-9-10-11-12	A3SS	E1,E6	E1,E5,E6	1.81916	0.921406	-0.897753	0.00995677	0.086085	0.0921476	0.188235	-0.0960877
CG3760	FBtr0072391,FBtr0072392,FBtr0309242:chr2R:+:20825783:20827292:CG3760:<1-3-4:6-7.8>	A3SS	E4,E6	E4,E5,E6	0.502407	-0.185717	-0.688124	1.06326e-05	0.000736907	0.306531	0.468254	-0.161723
CG3777	FBtr0070066,FBtr0070067,FBtr0070068:chrX:+:173735:244237:CG3777:<2:4-5-6-7-8>	A5SS	E2,E4	E2,E3,E4	-3.4208	-1.73172	1.68908	0.00037536	0.00926968	0.95271	0.791316	0.161394
CG3884	FBtr0087799,FBtr0087800,FBtr0302321:chr2R:-:8835852:8839791:CG3884:<1:3>	ES	E1,E3	E1,E2,E3	0.681451	0.330007	-0.351444	0.0431454	0.209516	0.232231	0.301338	-0.0691073
CG3961	FBtr0075077,FBtr0075078,FBtr0302322,FBtr0333712:chr3L:-:18871349:18883583:CG3961::10-11-12-13-14.15>	AFE	E1,E2,E3,E4,E5,E10	E8,E10	2.35266	2.82606	0.473396	0.058362	0.247319	0.7683	0.846828	-0.0785284
CG40160	FBtr0113813,FBtr0301797,FBtr0301802,FBtr0301803,FBtr0301804,FBtr0333380:chr3LHet:+:1562356:1575983:CG40160::7.8>	AFE	E1,E2,E7	E3,E7	0.653498	1.68801	1.03451	0.0209115	0.13656	0.320606	0.577689	-0.257083
CG40178	FBtr0113817,FBtr0113818,FBtr0333869:chr3LHet:-:1181139:1396811:CG40178:3:	ALE	E3,E5	E3,E6	-0.999275	-0.191171	0.808104	4.04128e-09	1.24038e-06	0.366923	0.565503	-0.19858
CG40178	FBtr0113817,FBtr0113818,FBtr0333869:chr3LHet:-:1181139:1396811:CG40178::3	AFE	E1,E3	E2,E3	-3.06984	-2.249	0.820839	0.00805314	0.0736263	0.925968	0.848285	0.0776825
CG40191	FBtr0113824,FBtr0113825,FBtr0113826,FBtr0113827:chr2RHet:+:390775:392982:CG40191:7:10>	IR	E7,E10	E7,E8,E9,E10	0.172373	-1.18126	-1.35364	2.60426e-06	0.00025433	0.181588	0.471623	-0.290035
CG40498,CR41510	FBtr0114246,FBtr0114247,FBtr0302340,FBtr0308892,FBtr0308893,FBtr0308894:chr2RHet:-:52810:78190:CG40498,CR41510:<1.2-3:5	ES	E3,E5	E3,E4,E5	0.693147	-0.949081	-1.64223	0.00824952	0.0747042	0.180762	0.516273	-0.335511
CG40498,CR41510	FBtr0114246,FBtr0114247,FBtr0302340,FBtr0308892,FBtr0308893,FBtr0308894:chr2RHet:-:52810:78190:CG40498,CR41510:5:	ALE	E5,E6	E5,E9,E10,E11,E12,E13	-3.76	-2.78852	0.971482	0.0454183	0.216847	0.0940234	0.217564	-0.12354
CG4065	FBtr0072280,FBtr0100398:chr2R:-:20022695:20025561:CG4065:<1:3-4-5-6-7>	A3SS	E1,E3	E1,E2,E3	-2.28238	-1.1421	1.14028	0.0300706	0.166942	0.895206	0.747034	0.148172
CG41099	FBtr0113988,FBtr0113989,FBtr0113990,FBtr0113991:chr3RHet:-:1685101:1706064:CG41099:4:	ALE	E4,E5	E4,E6,E7,E8,E9,E10,E11,E12	-2.21226	-1.60944	0.602825	0.0294094	0.164547	0.769061	0.878735	-0.109674
CG4210	FBtr0083049,FBtr0309248:chr3R:+:11039695:11040567:CG4210:<1:3-4-5>	IR	E1,E3	E1,E2,E3	-0.745791	0.973449	1.71924	2.96407e-05	0.00146398	0.482783	0.150652	0.332131
CG42235	FBtr0290137,FBtr0290138,FBtr0290139,FBtr0290140,FBtr0290141:chr3R:+:21732751:21746768:CG42235:<2-3-4-5-6:	ALE	E6,E12,E13,E14	E6,E7	0.725937	1.70475	0.978811	0.0438641	0.212083	0.349308	0.596736	-0.247428
CG42245,MEP-1	FBtr0072931,FBtr0072932,FBtr0072933,FBtr0072934,FBtr0072935,FBtr0072936,FBtr0290340,FBtr0290341:chr3L:+:2631714:2641984:CG42245,MEP-1:<1:3	IR	E1,E3	E1,E2,E3	0.392042	1.18958	0.797542	0.0431514	0.209516	0.25023	0.120351	0.12988
CG42245,MEP-1	FBtr0072931,FBtr0072932,FBtr0072933,FBtr0072934,FBtr0072935,FBtr0072936,FBtr0290340,FBtr0290341:chr3L:+:2631714:2641984:CG42245,MEP-1::5	AFE	E3,E5	E4,E5	0.485716	0.18693	-0.298786	0.0564418	0.242243	0.315382	0.376835	-0.0614533
CG42260	FBtr0299572,FBtr0299573,FBtr0330241:chr2R:-:18628503:18685794:CG42260:10:12-13-14.15.16>	A3SS	E10,E12	E10,E11,E12	-2.35138	1.22378	3.57515	4.36166e-05	0.0019523	0.88291	0.159361	0.723549
CG42268	FBtr0299606,FBtr0299607,FBtr0301858,FBtr0331537,FBtr0331538,FBtr0331539,FBtr0331540,FBtr0331541:chr3L:-:9727111:9753495:CG42268::5-6-7-8-9	AFE	E1,E3,E5	E4,E5	-0.759839	-0.0631789	0.69666	0.0528025	0.233839	0.274809	0.399869	-0.12506
CG42319	FBtr0299736,FBtr0299737,FBtr0299738,FBtr0299739,FBtr0299740,FBtr0299741:chr2R:+:9147605:9153841:CG42319:<3:6-7-8-9.10>	IR	E3,E6	E3,E4,E5,E6	-2.36948	-0.316883	2.0526	1.41463e-05	0.00086838	0.747422	0.286622	0.4608
CG42321	FBtr0299754,FBtr0299755,FBtr0299756,FBtr0299757,FBtr0299758,FBtr0299759,FBtr0299760,FBtr0299761,FBtr0299762,FBtr0299763,FBtr0299764,FBtr0299765,FBtr0303100,FBtr0306698:chr2R:-:9302482:9326550:CG42321:11-12-13-14-15-16-17-18:24>	ME	E18,E22	E18,E23,E24	-1.28292	-1.97408	-0.691165	0.0221211	0.140405	0.680018	0.820907	-0.140889
CG42324	FBtr0299777,FBtr0299778,FBtr0330141,FBtr0330142:chr3L:+:3472446:3510895:CG42324:3-4-5:	ALE	E5,E6	E5,E7,E8	-1.93284	-3.80666	-1.87382	0.033637	0.177566	0.735936	0.226208	0.509728
CG42351	FBtr0299942,FBtr0299943,FBtr0299944,FBtr0299945,FBtr0304051,FBtr0304052,FBtr0330006,FBtr0333163:chr2R:-:14644578:14648587:CG42351:<1-3.4-5-6-7.8:	ALE	E8,E11,E13,E14,E15	E8,E9	1.54031	2.41566	0.875355	0.00581389	0.0579635	0.587015	0.777697	-0.190681
CG42358,CG42359	FBtr0299957,FBtr0299958:chr3R:-:14985820:14988000:CG42358,CG42359:<1-2:	ALE	E2,E3	E2,E4,E5	-0.909675	-0.495788	0.413888	0.0179253	0.123834	0.449045	0.547356	-0.098311
CG42376,cin	FBtr0070064,FBtr0070065,FBtr0299977,FBtr0299978,FBtr0299979:chrX:+:148908:152503:CG42376,cin:<1:3>	IR	E1,E3	E1,E2,E3	-1.59857	-0.860201	0.738367	0.00217629	0.030461	0.687227	0.507596	0.179631
CG42455,vnc	FBtr0076348,FBtr0076349,FBtr0076350,FBtr0076351,FBtr0076352,FBtr0300237,FBtr0300238,FBtr0300239:chr3L:+:9965411:9967123:CG42455,vnc::3.4	AFE	E1,E3	E2,E3	0.988439	0.501086	-0.487353	0.00105782	0.0192015	0.205065	0.293518	-0.0884529
CG42514,CG43373	FBtr0300655,FBtr0300656,FBtr0300657,FBtr0307367,FBtr0307368:chr3L:-:16484937:16536318:CG42514,CG43373:<32:34-36-37-38-39>	A5SS	E32,E34	E32,E33,E34	-0.740104	-1.9652	-1.2251	0.000159475	0.00480933	0.434185	0.721378	-0.287193
CG42669	FBtr0302674,FBtr0302675,FBtr0302676,FBtr0302677,FBtr0302678,FBtr0302679,FBtr0302681,FBtr0302682,FBtr0302683,FBtr0302684,FBtr0302685,FBtr0306699,FBtr0306700,FBtr0306701,FBtr0306702,FBtr0306703,FBtr0331411,FBtr0331412:chr3L:+:2377718:2466353:CG42669::21.22.23>	AFE	E17,E19,E21	E20,E21	2.62424	1.88668	-0.737566	0.00115023	0.0196133	0.710909	0.542682	0.168226
CG42671	FBtr0302696,FBtr0302697,FBtr0302698,FBtr0302699,FBtr0302700,FBtr0304933,FBtr0304934,FBtr0330283:chr3L:+:11207599:11222735:CG42671:<1-4-5-6-7-8:11>	ES	E8,E11	E9,E11	-1.14535	-0.29168	0.853669	0.0229525	0.143411	0.258924	0.124776	0.134147
CG42674	FBtr0302712,FBtr0302713,FBtr0302714,FBtr0302715,FBtr0302716,FBtr0332698,FBtr0332699:chr3L:-:20142713:20191417:CG42674::6-7	AFE	E3,E4,E6	E5,E6	20	0.693147	-19.3069	0.000325854	0.00833449	1	0.306754	0.693246
CG42678	FBtr0302763,FBtr0302764,FBtr0302765,FBtr0302766,FBtr0302767,FBtr0302768,FBtr0302769,FBtr0302770,FBtr0302771,FBtr0302772,FBtr0302773,FBtr0302774,FBtr0302775:chr2R:+:18812612:18819567:CG42678:7-8-9:15-16	A3SS	E9,E11,E12,E13,E14,E15	E9,E15	3.39863	2.42791	-0.970717	1.62074e-06	0.000183271	0.659597	0.431539	0.228059
CG42684	FBtr0302833,FBtr0302834,FBtr0302835,FBtr0302836,FBtr0302837:chrX:+:17604177:17645718:CG42684:<1-2:4	ES	E2,E4	E2,E3,E4	0.768371	0.182322	-0.586049	0.0397624	0.199602	0.225904	0.367457	-0.141553
CG42709	FBtr0302980,FBtr0302981,FBtr0302982:chr3L:+:12783291:12789184:CG42709:<1:4-5-6-7-8-9-10>	A5SS	E1,E4	E1,E2,E4	-0.597763	-2.48488	-1.88711	5.40876e-06	0.000446951	0.332081	0.760164	-0.428083
CG42724	FBtr0303012,FBtr0303013,FBtr0303014,FBtr0303015,FBtr0303016,FBtr0303017,FBtr0303018:chr3R:-:2187382:2194010:CG42724:7:11	IR	E7,E11	E7,E8,E9,E10,E11	-1.59686	-3.46574	-1.86888	0.000972158	0.017852	0.594191	0.920802	-0.326611
CG42724	FBtr0303012,FBtr0303013,FBtr0303014,FBtr0303015,FBtr0303016,FBtr0303017,FBtr0303018:chr3R:-:2187382:2194010:CG42724::7	AFE	E1,E2,E3,E5,E7	E6,E7	4.00343	3.17805	-0.825376	0.00959594	0.0839791	0.85066	0.722736	0.127924
CG42748,CR43241	FBtr0303271,FBtr0303272,FBtr0303273,FBtr0303274,FBtr0303275,FBtr0303276,FBtr0303277,FBtr0306295,FBtr0306296,FBtr0306297,FBtr0333741,FBtr0333742,FBtr0333743,FBtr0333744,FBtr0333745:chr2L:+:22131220:22166221:CG42748,CR43241:15-16:18	IR	E16,E18	E16,E17,E18	-1.52606	-5.07147e-09	1.52606	0.00140478	0.022693	0.516751	0.167343	0.349408
CG42748,CR43241	FBtr0303271,FBtr0303272,FBtr0303273,FBtr0303274,FBtr0303275,FBtr0303276,FBtr0303277,FBtr0306295,FBtr0306296,FBtr0306297,FBtr0333741,FBtr0333742,FBtr0333743,FBtr0333744,FBtr0333745:chr2L:+:22131220:22166221:CG42748,CR43241::15-16	AFE	E14,E15	E6,E7,E9,E10,E12,E13,E15	-1.884	-1.21594	0.668066	0.0464583	0.218982	0.158242	0.0974615	0.0607808
CG42788	FBtr0303485,FBtr0303486:chr3R:-:10921678:10957646:CG42788:<1-2-3-4-5-6-7-8:10-11>	A3SS	E8,E10	E8,E9,E10	-0.307485	0.543615	0.8511	0.0330688	0.175862	0.56256	0.349288	0.213273
CG42797	FBtr0303708,FBtr0303709,FBtr0303710,FBtr0332963:chrX:+:9502978:9517276:CG42797:<1:3-4	A3SS	E1,E3	E1,E2,E3	-3.95124	2.48491	6.43615	4.10242e-07	5.68648e-05	0.983179	0.0657718	0.917407
CG42797	FBtr0303708,FBtr0303709,FBtr0303710,FBtr0332963:chrX:+:9502978:9517276:CG42797::7-8.9.10>	AFE	E3,E4,E7	E5,E7	3.15454	2.0329	-1.12163	0.0387074	0.19637	0.826012	0.646453	0.179558
CG43078	FBtr0304807,FBtr0304808,FBtr0304809,FBtr0304810,FBtr0304811,FBtr0304812,FBtr0304813,FBtr0304814,FBtr0304815,FBtr0333111,FBtr0333112,FBtr0333113:chr3L:+:8571841:8592717:CG43078:<1.2.3-4:9-10	ES	E4,E9	E4,E6,E9	-0.201138	-1.22834	-1.02721	0.0133469	0.105426	0.298376	0.527646	-0.229271
CG43340	FBtr0306931,FBtr0306932,FBtr0306933,FBtr0306934,FBtr0306935,FBtr0306936,FBtr0306937,FBtr0306938,FBtr0306939,FBtr0306940,FBtr0306941,FBtr0306942,FBtr0306943,FBtr0331951,FBtr0331952:chr2R:+:3510746:3539292:CG43340:8-9-10:	ALE	E10,E11	E10,E16,E18,E19,E20	-3.48767	-5.3799	-1.89223	9.2907e-05	0.00332685	0.273667	0.0559507	0.217716
CG43340	FBtr0306931,FBtr0306932,FBtr0306933,FBtr0306934,FBtr0306935,FBtr0306936,FBtr0306937,FBtr0306938,FBtr0306939,FBtr0306940,FBtr0306941,FBtr0306942,FBtr0306943,FBtr0331951,FBtr0331952:chr2R:+:3510746:3539292:CG43340::8-9-10	AFE	E3,E8	E5,E6,E7,E8	-0.743715	-1.60414	-0.860425	0.000478225	0.0108584	0.752161	0.863335	-0.111175
CG43340	FBtr0306931,FBtr0306932,FBtr0306933,FBtr0306934,FBtr0306935,FBtr0306936,FBtr0306937,FBtr0306938,FBtr0306939,FBtr0306940,FBtr0306941,FBtr0306942,FBtr0306943,FBtr0331951,FBtr0331952:chr2R:+:3510746:3539292:CG43340:<12:15	A3SS	E12,E15	E12,E14,E15	-3.00815	-1.65292	1.35523	0.0242331	0.147894	0.886142	0.735009	0.151133
CG43386	FBtr0307591,FBtr0307592,FBtr0307593:chrX:-:9860743:9871448:CG43386:3:	ALE	E3,E4,E5	E3,E6,E7	1.13074	1.43081	0.300064	0.00488929	0.0530985	0.567895	0.63098	-0.0630847
CG43427	FBtr0308849,FBtr0308850,FBtr0308851,FBtr0308852,FBtr0308853,FBtr0308854,FBtr0308855,FBtr0308856,FBtr0308857,FBtr0308858:chr3R:+:485304:537915:CG43427:5:7-8-9-10-11-12	ES	E5,E7	E5,E6,E7	-3.28653	-2.31628	0.970251	0.00396586	0.045405	0.928399	0.827239	0.101161
CG43427	FBtr0308849,FBtr0308850,FBtr0308851,FBtr0308852,FBtr0308853,FBtr0308854,FBtr0308855,FBtr0308856,FBtr0308857,FBtr0308858:chr3R:+:485304:537915:CG43427:<1.2:5	IR	E2,E5	E2,E3,E4,E5	-3.27294	-4.31971	-1.04676	0.0264458	0.155412	0.706141	0.851563	-0.145422
CG43427	FBtr0308849,FBtr0308850,FBtr0308851,FBtr0308852,FBtr0308853,FBtr0308854,FBtr0308855,FBtr0308856,FBtr0308857,FBtr0308858:chr3R:+:485304:537915:CG43427:7-8-9-10-11-12:16-17-18-19	ES	E12,E16	E12,E14,E16	1.42947	0.967992	-0.461474	0.0443299	0.213071	0.0983955	0.146361	-0.0479652
CG43739,sky	FBtr0081440,FBtr0081441,FBtr0081442,FBtr0081443,FBtr0081444,FBtr0081445,FBtr0081446,FBtr0081447,FBtr0301961,FBtr0330255,FBtr0330256,FBtr0330257,FBtr0330258:chr2L:-:20871334:20918931:CG43739,sky:<1:	ALE	E1,E2	E1,E5,E6	-0.373204	-1.16113	-0.787928	0.000380942	0.00935377	0.770577	0.60058	0.169997
CG43739,sky	FBtr0081440,FBtr0081441,FBtr0081442,FBtr0081443,FBtr0081444,FBtr0081445,FBtr0081446,FBtr0081447,FBtr0301961,FBtr0330255,FBtr0330256,FBtr0330257,FBtr0330258:chr2L:-:20871334:20918931:CG43739,sky::5-6	AFE	E1,E5	E3,E4,E5	0.679902	1.30046e-06	-0.679901	0.00402029	0.0458228	0.165552	0.280844	-0.115291
CG43783,orb2	FBtr0331511,FBtr0331512,FBtr0331513,FBtr0331514,FBtr0331515,FBtr0331516,FBtr0331517,FBtr0331518,FBtr0331519,FBtr0331520:chr3L:-:8925334:8947563:CG43783,orb2:6-7-8:	ALE	E8,E10,E11,E12,E13	E8,E16,E17,E18,E19	0.646121	0.0222657	-0.623855	0.00208365	0.0295624	0.429624	0.290168	0.139456
CG43897	FBtr0332819,FBtr0332820,FBtr0332821,FBtr0332822,FBtr0332823,FBtr0332824,FBtr0332825,FBtr0332826,FBtr0332827,FBtr0332828,FBtr0332829,FBtr0332830,FBtr0332831,FBtr0332832,FBtr0332833,FBtr0332834,FBtr0332835:chr3L:+:9806946:9827445:CG43897:14:17.18.19-20-21>	A3SS	E14,E17	E14,E16	-6.27288	2.67906	8.95194	8.74769e-09	2.32154e-06	0.998064	0.060086	0.937978
CG43897	FBtr0332819,FBtr0332820,FBtr0332821,FBtr0332822,FBtr0332823,FBtr0332824,FBtr0332825,FBtr0332826,FBtr0332827,FBtr0332828,FBtr0332829,FBtr0332830,FBtr0332831,FBtr0332832,FBtr0332833,FBtr0332834,FBtr0332835:chr3L:+:9806946:9827445:CG43897:<4-6.7-9-13:16	ES	E13,E16	E14,E16	-1.94214	0.305382	2.24753	6.42561e-05	0.00258045	0.41155	0.0708423	0.340708
CG4495	FBtr0079405,FBtr0113028:chr2L:+:7182235:7185530:CG4495:<1-2:5-6-7-8-9>	ME	E2,E3,E5	E2,E4,E5	2.43647	1.93814	-0.498336	0.0315464	0.172242	0.920272	0.871758	0.0485135
CG4511	FBtr0082286,FBtr0302202:chr3R:+:6680220:6682134:CG4511::3-4>	AFE	E1,E3	E2,E3	3.20913	4.02892	0.819785	0.00694322	0.0654061	0.0731653	0.0335175	0.0396478
CG4562	FBtr0083859,FBtr0113250,FBtr0330034,FBtr0330035,FBtr0330036:chr3R:-:15692720:15701139:CG4562:<3:5-6-7-8-9-10-11-13-15.16>	A3SS	E3,E5	E3,E4,E5	0.693147	1.44299	0.749843	0.000366331	0.00909899	0.270186	0.144007	0.12618
CG4572	FBtr0083860,FBtr0083861,FBtr0302327:chr3R:-:15688238:15690142:CG4572:<2:5>	IR	E2,E5	E2,E3,E4,E5	-0.783531	-0.128617	0.654914	0.0169344	0.120679	0.370507	0.234764	0.135743
CG4692	FBtr0072339,FBtr0072340:chr2R:-:20486610:20487344:CG4692:<1.2:4-5>	IR	E2,E4	E2,E3,E4	0.824914	1.24882	0.423909	0.000559091	0.0121334	0.156768	0.106958	0.0498098
CG4702	FBtr0082550,FBtr0308292,FBtr0308293,FBtr0308294:chr3R:-:7947304:7953919:CG4702:<1.2.3.4:6-7	A3SS	E4,E6	E4,E5,E6	-1.72924	-2.11858	-0.389342	0.00180403	0.0269164	0.84156	0.88792	-0.0463602
CG4829	FBtr0074336,FBtr0074337,FBtr0074338,FBtr0112994,FBtr0112995:chrX:+:16705732:16720529:CG4829::5-6	AFE	E1,E5	E3,E4,E5	-0.153768	-0.965513	-0.811744	0.000156362	0.00480933	0.614365	0.791484	-0.177119
CG4829	FBtr0074336,FBtr0074337,FBtr0074338,FBtr0112994,FBtr0112995:chrX:+:16705732:16720529:CG4829:5-6:8-9-10-11>	A3SS	E6,E8	E6,E7,E8	-1.84464	-2.20536	-0.360718	0.034398	0.180034	0.49224	0.584895	-0.0926549
CG4945	FBtr0087098,FBtr0087099,FBtr0087100:chr2R:+:12453551:12457625:CG4945:4-5-6-7-8-9:11>	IR	E9,E10,E11	E9,E11	1.20984	3.14415	1.93431	0.000734606	0.0146819	0.318937	0.753576	-0.434639
CG4945	FBtr0087098,FBtr0087099,FBtr0087100:chr2R:+:12453551:12457625:CG4945:<1:4-5-6-7-8-9	A5SS	E1,E4	E1,E2,E4	-0.901901	-2.36194	-1.46003	0.0438775	0.212083	0.663713	0.90009	-0.236378
CG5171	FBtr0079439,FBtr0079440,FBtr0114588,FBtr0302587:chr2L:+:7395831:7404526:CG5171:<3-5:7-8-9>	IR	E5,E7	E5,E6,E7	0.180792	-0.444119	-0.624911	0.000167021	0.00491567	0.122889	0.2104	-0.0875108
CG5174	FBtr0086684,FBtr0086686,FBtr0086687,FBtr0086688,FBtr0086689,FBtr0086690,FBtr0301148,FBtr0301149,FBtr0306636,FBtr0306637:chr2R:+:14308914:14313732:CG5174:11.12:14.15.16>	A5SS	E12,E14	E12,E13,E14	0.86177	1.18091	0.319145	0.0186482	0.126424	0.185415	0.142293	0.0431218
CG5191	FBtr0083904,FBtr0083905,FBtr0083906,FBtr0083907,FBtr0083908:chr3R:+:16386581:16398636:CG5191:<1:3	IR	E1,E3	E1,E2,E3	1.08744	0.412845	-0.674594	0.017135	0.121105	0.132393	0.247507	-0.115115
CG5273	FBtr0070135,FBtr0070136,FBtr0070137:chrX:+:653627:655972:CG5273:<1.2:4	IR	E2,E4	E2,E3,E4	-0.897942	-0.481838	0.416104	0.0266896	0.155611	0.504275	0.412258	0.0920172
CG5484	FBtr0085037,FBtr0085038,FBtr0085039:chr3R:+:22543569:22545529:CG5484:<1:4-5-6>	A5SS	E1,E4	E1,E2,E3,E4	2.50738	1.59109	-0.916291	0.0158817	0.116457	0.0498336	0.117219	-0.0673858
CG5618	FBtr0078179,FBtr0331819,FBtr0331820:chr3L:+:20346548:20349732:CG5618:<2.3-4:	ALE	E4,E5	E4,E6,E7	-0.768371	-1.22503	-0.456656	0.0409425	0.202918	0.803183	0.708102	0.0950805
CG5746	FBtr0084630,FBtr0084631,FBtr0273282,FBtr0273283:chr3R:-:20171506:20174509:CG5746:4-5:7-8-9-10>	IR	E5,E7	E5,E6,E7	-1.46176	-0.266513	1.19525	1.74034e-05	0.00094838	0.642645	0.352547	0.290097
CG5793	FBtr0304713,FBtr0333929,FBtr0333930:chr3R:+:16953294:16955323:CG5793::5-6-7-8.9>	AFE	E2,E3,E5	E4,E5	0.397497	1.1746	0.777101	0.000266852	0.00716665	0.197991	0.35097	-0.152979
CG5819	FBtr0071811,FBtr0071812,FBtr0308774:chr2R:+:18180921:18184460:CG5819:<3:5-6-7-8>	IR	E3,E5	E3,E4,E5	0.473288	0.0698974	-0.40339	0.00368142	0.0434589	0.120796	0.170806	-0.0500097
CG5973	FBtr0079446,FBtr0079447,FBtr0079448,FBtr0301152,FBtr0332530,FBtr0332531:chr2L:+:7437491:7445883:CG5973:5:7-8-9-10-11-12-13.14>	A5SS	E5,E7	E5,E6,E7	-1.20266	-0.124053	1.0786	1.13301e-06	0.000131582	0.163192	0.0596371	0.103554
CG6043	FBtr0089910,FBtr0089911,FBtr0113039,FBtr0113040,FBtr0114471,FBtr0302138,FBtr0302139,FBtr0302140,FBtr0302141,FBtr0305067,FBtr0305068:chr2L:+:13261009:13284043:CG6043:10:12-13-14	A5SS	E10,E12	E10,E11,E12	-1.32427	-5.39328	-4.06901	1.79104e-05	0.000950135	0.321029	0.968601	-0.647571
CG6043	FBtr0089910,FBtr0089911,FBtr0113039,FBtr0113040,FBtr0114471,FBtr0302138,FBtr0302139,FBtr0302140,FBtr0302141,FBtr0305067,FBtr0305068:chr2L:+:13261009:13284043:CG6043:<1.2:4	IR	E2,E4	E2,E3,E4	2.45316	1.15745	-1.29571	0.00110496	0.0194309	0.0108445	0.042274	-0.0314295
CG6043	FBtr0089910,FBtr0089911,FBtr0113039,FBtr0113040,FBtr0114471,FBtr0302138,FBtr0302139,FBtr0302140,FBtr0302141,FBtr0305067,FBtr0305068:chr2L:+:13261009:13284043:CG6043::9	AFE	E5,E6,E7,E9	E8,E9	-0.599118	-1.41528	-0.816164	0.0128051	0.102696	0.134827	0.0671373	0.0676901
CG6084	FBtr0076138,FBtr0076139,FBtr0331546,FBtr0331547:chr3L:-:11613634:11617481:CG6084:<3-4-5-6:8>	ES	E6,E8	E6,E7,E8	0.616632	1.11406	0.497424	7.55643e-05	0.00287833	0.103119	0.0656231	0.0374956
CG6091	FBtr0273304,FBtr0273305,FBtr0273306,FBtr0301145:chr3L:-:11598535:11602540:CG6091:3-4-6-7-8-9:11-12.13>	IR	E9,E10,E11	E9,E11	-0.630233	0.0855222	0.715756	0.0179811	0.12402	0.18924	0.319412	-0.130173
CG6329	FBtr0087633,FBtr0087634,FBtr0087635,FBtr0087636:chr2R:+:9713879:9720419:CG6329:<1.2:6-7-8.9>	A5SS	E2,E6	E2,E3,E6	1.18427	1.73827	0.554003	0.0335939	0.177566	0.145216	0.0897312	0.0554852
CG6361	FBtr0074630,FBtr0113000,FBtr0332377:chrX:-:18374015:18377805:CG6361:<1.2-3-4:6-7-8	ES	E4,E6	E4,E5,E6	-0.411459	-1.40687	-0.995415	0.00426521	0.0481039	0.0842908	0.204923	-0.120632
CG6361	FBtr0074630,FBtr0113000,FBtr0332377:chrX:-:18374015:18377805:CG6361::10.11>	AFE	E6,E7,E8,E10	E9,E10	5.33513	4.01063	-1.3245	0.0494154	0.224534	0.958027	0.853521	0.104506
CG6659	FBtr0074612,FBtr0074613:chrX:-:18547424:18551319:CG6659::4-5-6-7-8-9>	AFE	E1,E2,E4	E3,E4	3.42254	4.72206	1.29953	0.00555137	0.056393	0.951678	0.986499	-0.0348204
CG6673	FBtr0076653,FBtr0076654:chr3L:-:8514528:8516601:CG6673:<1:	ALE	E1,E2	E1,E3,E4	1.33433	0.589607	-0.744728	0.00048419	0.010893	0.796914	0.646663	0.150251
CG6686	FBtr0089572,FBtr0089573,FBtr0301171:chr2L:-:11984326:11988035:CG6686:<1:4-5-6-7-8>	ES	E1,E4	E1,E3,E4	2.94444	1.47018	-1.47426	0.00329334	0.0402031	0.0343643	0.135541	-0.101176
CG6726	FBtr0084348,FBtr0084349:chr3R:+:18917448:18919181:CG6726::3-4-5-6>	AFE	E1,E3	E2,E3	1.123	1.75314	0.630141	0.0481763	0.221405	0.104241	0.0552332	0.0490077
CG6767	FBtr0076415,FBtr0076416,FBtr0310662,FBtr0310663,FBtr0310664,FBtr0333856,FBtr0333857:chr3L:-:9676678:9689800:CG6767::3-4	AFE	E1,E3	E2,E3	2.23683	1.52243	-0.714407	0.0142991	0.109135	0.0643647	0.12461	-0.0602457
CG6904	FBtr0083035,FBtr0083036,FBtr0083037,FBtr0333276:chr3R:-:10967564:10973253:CG6904::6-7-8-9>	AFE	E1,E6	E5,E6	0.905174	0.31541	-0.589764	6.66177e-06	0.000519707	0.128718	0.212158	-0.0834399
CG6945,cp309	FBtr0075657,FBtr0099993,FBtr0305977,FBtr0305979,FBtr0333939,FBtr0333940,FBtr0333941,FBtr0333942,FBtr0333943,FBtr0333944,FBtr0333945,FBtr0333946,FBtr0333947:chr3L:-:15059340:15087824:CG6945,cp309::18-19-20-21>	AFE	E16,E18	E17,E18	1.61103	0.91541	-0.695622	0.0570809	0.243814	0.438393	0.591356	-0.152963
CG6981	FBtr0074820,FBtr0074821:chr3L:+:20181621:20182879:CG6981:<1:3-4-5>	IR	E1,E3	E1,E2,E3	-0.399341	0.0725971	0.471939	8.07566e-05	0.00299147	0.39944	0.308294	0.0911462
CG7023,CG7029	FBtr0084311,FBtr0084312,FBtr0113269,FBtr0113270,FBtr0113271,FBtr0310036,FBtr0310037,FBtr0310038,FBtr0310039:chr3R:+:18576613:18619752:CG7023,CG7029:13-14:17	A3SS	E14,E17	E14,E16	-1.60438	-0.915643	0.688738	0.027108	0.156985	0.750505	0.601392	0.149113
CG7071,muted	FBtr0084211,FBtr0084212,FBtr0110878:chr3R:+:18188618:18190306:CG7071,muted::3-4-5.6>	AFE	E1,E3	E2,E3	1.4102	1.93514	0.524938	0.0218777	0.139932	0.272715	0.181761	0.0909539
CG7112	FBtr0076605,FBtr0113153:chr3L:+:8339660:8345379:CG7112:3-4-5-6-7-8-9:	ALE	E9,E10	E9,E11	2.02438	1.34373	-0.680647	0.0596406	0.249781	0.917155	0.851908	0.0652469
CG7224	FBtr0079532,FBtr0100151:chr2L:+:7998933:7999743:CG7224::3.4>	AFE	E1,E3	E2,E3	1.42674	2.593	1.16625	0.0165099	0.118833	0.39309	0.192021	0.20107
CG7255	FBtr0100360,FBtr0110880,FBtr0110881,FBtr0301185,FBtr0334105:chr3L:+:15297354:15304295:CG7255:6.7-8-9-10-11-12:14>	A3SS	E12,E14	E12,E13,E14	0.860884	-1.86739	-2.72827	0.00320164	0.0394197	0.0099756	0.522436	-0.51246
CG7394	FBtr0076098,FBtr0290024,FBtr0305648,FBtr0333215:chr3L:+:11555095:11557412:CG7394::6-7.8.9>	AFE	E3,E6	E5,E6	1.48409	2.23645	0.752353	0.00047777	0.0108584	0.104849	0.0531252	0.0517239
CG7427	FBtr0075561,FBtr0306154,FBtr0306155,FBtr0306156,FBtr0331934:chr3L:+:15556526:15558659:CG7427::8.9>	AFE	E1,E2,E3,E8	E5,E6,E7,E8	2.39439	1.89939	-0.495002	0.00667242	0.0642244	0.102876	0.158209	-0.0553327
CG7530	FBtr0083019,FBtr0083020,FBtr0083021,FBtr0333277:chr3R:-:10550481:10557231:CG7530::7-8-9-10>	AFE	E5,E7	E6,E7	0.774373	0.226313	-0.548059	0.00670544	0.0643153	0.155603	0.243946	-0.0883425
CG7646,Nca	FBtr0074900,FBtr0074901,FBtr0074902,FBtr0302048:chr3L:+:19984986:19990668:CG7646,Nca:<1-2:	ALE	E2,E5,E6	E2,E7,E8,E9,E10	-0.316677	-0.572924	-0.256247	0.000162288	0.00480933	0.54712	0.485576	0.0615442
CG7675	FBtr0083581,FBtr0083582,FBtr0083583:chr3R:-:14203841:14206897:CG7675:<1:4-5>	A5SS	E1,E4	E1,E2,E4	-2.52734	-3.03672	-0.509379	0.000877658	0.0165408	0.863961	0.912045	-0.0480834
CG7705	FBtr0083688,FBtr0083689:chr3R:-:14500375:14503278:CG7705::7>	AFE	E5,E7	E6,E7	1.66525	20	18.3347	0.00641528	0.0625864	0.0897069	0	0.0897069
CG7720	FBtr0083678,FBtr0083679,FBtr0301199,FBtr0301200,FBtr0301201:chr3R:-:14584957:14620876:CG7720::4.5	AFE	E1,E4	E3,E4	20	2.27975	-17.7203	0.0194145	0.129944	0	0.0456099	-0.0456099
CG7757	FBtr0074891,FBtr0074892:chr3L:+:19903399:19905604:CG7757:<2:4-5>	IR	E2,E4	E2,E3,E4	-4.74927	-2.64553	2.10374	0.00242874	0.0329221	0.979514	0.853639	0.125875
CG7766	FBtr0071351,FBtr0071352,FBtr0114594,FBtr0114595,FBtr0309250,FBtr0309251:chrX:-:8987644:8997756:CG7766:9-10:12	A3SS	E10,E12	E10,E11,E12	-1.327	-0.377477	0.94952	0.0434884	0.210914	0.78051	0.567825	0.212685
CG7879	FBtr0072826,FBtr0072827:chr3L:-:1559812:1568608:CG7879:<1:3-4>	ES	E1,E3	E1,E2,E3	-1.20532	-1.7193	-0.513981	0.00513545	0.0541318	0.510498	0.629691	-0.119193
CG7884	FBtr0074674,FBtr0332392:chrX:+:19114654:19129943:CG7884:4:6>	IR	E4,E6	E4,E5,E6	-0.640895	0.48695	1.12784	0.00329052	0.0402031	0.293012	0.111203	0.18181
CG7956	FBtr0084112,FBtr0100124,FBtr0110891,FBtr0301211,FBtr0301212:chr3R:+:17346662:17353419:CG7956::14-15>	AFE	E11,E12,E14	E13,E14	1.22518	0.693147	-0.532028	0.0258532	0.154107	0.221364	0.140945	0.0804187
CG8005	FBtr0076695,FBtr0332137:chr3L:+:8191306:8192591:CG8005:<1:3>	A3SS	E1,E3	E1,E2,E3	-2.5177	-1.36098	1.15672	0.0409417	0.202918	0.91278	0.748121	0.164659
CG8009	FBtr0076254,FBtr0076255:chr3L:+:10631245:10632778:CG8009:<1-2:4-5>	A3SS	E2,E4	E2,E3,E4	0.820981	1.99243	1.17145	0.0134114	0.105741	0.26129	0.0989956	0.162295
CG8080	FBtr0088633,FBtr0310143,FBtr0310144,FBtr0310145,FBtr0310146:chr2R:-:4977278:4980474:CG8080:<2-5:7	A3SS	E5,E7	E5,E6,E7	-1.55814	0.0618754	1.62002	1.71205e-05	0.00094838	0.768697	0.422772	0.345925
CG8083	FBtr0088560,FBtr0088561,FBtr0088562:chr2R:+:4966231:4969879:CG8083:3:5-6-7-8-9-10>	A3SS	E3,E5	E3,E4,E5	1.09861	-0.154151	-1.25276	0.00198204	0.0287731	0.240955	0.510714	-0.269759
CG8083	FBtr0088560,FBtr0088561,FBtr0088562:chr2R:+:4966231:4969879:CG8083::3	AFE	E1,E3	E2,E3	5.39363	3.68888	-1.70475	0.0296696	0.165572	0.0287184	0.163449	-0.13473
CG8086	FBtr0079620,FBtr0079621,FBtr0306391,FBtr0306392,FBtr0332360,FBtr0332361,FBtr0332362,FBtr0332363,FBtr0332364,FBtr0332365,FBtr0332366,FBtr0332367:chr2L:-:8244159:8257502:CG8086:7-8-9-10-11:14-15-17>	ES	E11,E14	E11,E12	-2.19722	-1.03609	1.16113	0.0537111	0.235507	0.771704	0.496143	0.27556
CG8108	FBtr0076339,FBtr0076340:chr3L:+:9857738:9863774:CG8108:<1:3-4-5-6-7-8-9>	A3SS	E1,E3	E1,E2,E3	-1.50161	-2.24316	-0.741556	0.00729965	0.0677464	0.756147	0.861211	-0.105064
CG8170	FBtr0088665,FBtr0110892:chr2R:-:4906529:4918546:CG8170:<1-2-3-4:6-7-8-9>	ES	E4,E6	E4,E5,E6	0.800119	0.179048	-0.621071	0.0317837	0.172468	0.0730867	0.142175	-0.0690882
CG8369	FBtr0081920,FBtr0305187,FBtr0305188:chr3R:+:4647729:4648560:CG8369:<1:4-5>	IR	E1,E4	E1,E2,E3,E4	-0.66905	0.207639	0.876689	0.0236281	0.145878	0.196553	0.124752	0.0718005
CG8408	FBtr0074487,FBtr0290036:chrX:-:17517246:17521929:CG8408:<1-2-3:	ALE	E3,E4	E3,E5	-1.73912	-2.76362	-1.0245	0.0283579	0.16097	0.334221	0.161337	0.172883
CG8481	FBtr0082134,FBtr0100583:chr3R:+:5593572:5595749:CG8481:<1:	ALE	E1,E2	E1,E3	-0.907304	-0.19887	0.708434	0.00635643	0.0622177	0.827323	0.910847	-0.0835242
CG8726	FBtr0088873,FBtr0088874,FBtr0301231:chr2R:-:3855633:3859554:CG8726:3-4-5-6-7:	ALE	E7,E8	E7,E9,E10	-2.17004	-1.56124	0.608803	0.0250148	0.150544	0.639146	0.766629	-0.127483
CG8740	FBtr0088711,FBtr0088712,FBtr0088713,FBtr0290115:chr2R:+:4623323:4647095:CG8740:<1:5-6-7-8-9-10-11>	ES	E1,E5	E1,E2,E5	-0.405465	0.559616	0.965081	0.00180039	0.0269164	0.169674	0.0673298	0.102344
CG8786	FBtr0074962,FBtr0290116,FBtr0306354,FBtr0331862:chr3L:-:19630867:19635916:CG8786:<1-2-3-5:8>	IR	E5,E8	E5,E6,E7,E8	-1.60944	-0.900787	0.708651	0.0528953	0.233839	0.151119	0.0913999	0.0597196
CG8839	FBtr0087957,FBtr0087958,FBtr0087959,FBtr0087960:chr2R:-:8227114:8232118:CG8839::5-6-7-8>	AFE	E1,E5	E2,E5	0.161641	0.942363	0.780722	4.25694e-05	0.00194596	0.583083	0.398477	0.184605
CG8920	FBtr0086280,FBtr0086281,FBtr0301207,FBtr0309253:chr2R:+:16206711:16213478:CG8920:<3-5-6:	ALE	E6,E7	E6,E8,E9,E10,E11	-3.83586	-3.08552	0.750344	0.0214061	0.138253	0.0859048	0.164973	-0.0790686
CG9003	FBtr0088088,FBtr0113067,FBtr0113068,FBtr0113069,FBtr0330632,FBtr0330633,FBtr0330634:chr2R:-:7528981:7539127:CG9003::7-8-9-10-11-12-13-14.15.16>	AFE	E1,E2,E3,E7	E4,E7	0.800119	0.259511	-0.540608	0.0533598	0.23436	0.353093	0.23251	0.120583
CG9007	FBtr0075768,FBtr0333050:chr3L:+:13995226:14013248:CG9007:<1:	ALE	E1,E2	E1,E3,E4,E5,E6,E7,E8,E9	-2.13029	-3.29852	-1.16822	0.0561782	0.241736	0.950461	0.460254	0.490208
CG9153	FBtr0072670,FBtr0072671,FBtr0310555:chr3L:+:1313695:1318330:CG9153:<1:3-4	IR	E1,E3	E1,E2,E3	-1.57735	-0.670973	0.906376	3.79381e-05	0.00177196	0.672179	0.453639	0.21854
CG9171	FBtr0301234,FBtr0301235,FBtr0301236,FBtr0332038,FBtr0332039:chr2L:-:5766993:5800173:CG9171:4:8>	ES	E4,E8	E4,E5,E8	-1.97897	-4.11087	-2.1319	0.000302331	0.00787344	0.837222	0.980301	-0.143079
CG9297	FBtr0082827,FBtr0082828,FBtr0333191,FBtr0333192,FBtr0333193:chr3R:+:9597216:9605039:CG9297:<3-7-8-9:11-12-13-14-15-16-17-18-19-20>	IR	E9,E10,E11	E9,E11	0.322615	-0.041549	-0.364164	0.00491238	0.0530985	0.374226	0.302403	0.0718239
CG9331	FBtr0081417,FBtr0081418,FBtr0081419,FBtr0081420,FBtr0081421,FBtr0302942,FBtr0302943,FBtr0302944,FBtr0302945:chr2L:+:20824435:20827724:CG9331:<1:9	IR	E1,E9	E3,E5,E6,E7,E8,E9	-4.09293	-0.399014	3.69391	5.1694e-08	1.05776e-05	0.947757	0.120738	0.827019
CG9422	FBtr0086120,FBtr0086121,FBtr0306112:chr2R:+:2563332:2580376:CG9422::3-4-5-6.7>	AFE	E1,E3	E2,E3	2.78809	1.4018	-1.38629	0.0277264	0.159066	0.0188144	0.069528	-0.0507136
CG9626	FBtr0081864,FBtr0306805,FBtr0306806,FBtr0332541:chr3R:-:4119564:4126700:CG9626:4-5-6-7-8:10-11-12-13-14-15-16-17>	IR	E8,E10	E8,E9,E10	-1.32223	-0.397061	0.925168	0.017667	0.12306	0.613562	0.38113	0.232432
CG9636	FBtr0081806,FBtr0306301:chr3R:-:4066468:4069547:CG9636:<1:3-4-5-6>	IR	E1,E3	E1,E2,E3	-4.13402	-3.00285	1.13117	0.017317	0.122186	0.947899	0.85519	0.0927096
CG9669	FBtr0075339,FBtr0305272:chr3L:-:16837667:16838091:CG9669:<1:3>	A5SS	E1,E3	E1,E2,E3	-2.69878	-2.10184	0.596937	0.0177167	0.12306	0.911682	0.850045	0.061637
CG9674	FBtr0075341,FBtr0075343,FBtr0075344,FBtr0305915,FBtr0305916,FBtr0333608,FBtr0333609:chr3L:-:16780672:16800831:CG9674:<2:	ALE	E2,E3,E4	E2,E5,E6,E7	-4.16885	-2.57713	1.59173	0.00563239	0.0570811	0.435162	0.776138	-0.340976
CG9691	FBtr0071391,FBtr0071392:chrX:+:9778474:9779079:CG9691:<1:3>	IR	E1,E3	E1,E2,E3	-3.09898	-1.79791	1.30107	1.0431e-05	0.000734788	0.902365	0.719221	0.183144
CG9894	FBtr0077713,FBtr0077714,FBtr0307080:chr2L:+:2752798:2757703:CG9894:<1:4-5-6.7>	A5SS	E1,E4	E1,E2,E4	2.84087	4.90072	2.05985	2.29077e-06	0.000234368	0.0527143	0.00696509	0.0457492
CG9940	FBtr0073844,FBtr0073845:chrX:-:13578585:13612316:CG9940:<1:3-4-5-6-7>	ES	E1,E3	E1,E2,E3	-4.09434	-3.08191	1.01243	0.0385986	0.196157	0.939372	0.864248	0.0751244
CG9945	FBtr0086225,FBtr0086226:chr2R:+:16506007:16508586:CG9945:<1-2-3-4-5-6-7:9>	IR	E7,E9	E7,E8,E9	-4.09434	-2.60797	1.48638	0.00480419	0.0525283	0.967035	0.859101	0.107934
CG9948	FBtr0076896,FBtr0333081,FBtr0333082:chr3L:+:6949090:6950540:CG9948:<2.3:5-6>	IR	E3,E5	E3,E4,E5	-3.04452	-20	-16.9555	0.00838241	0.0750401	0.902299	1	-0.0977011
CG9992	FBtr0074306,FBtr0074307,FBtr0074308,FBtr0074309,FBtr0074310:chrX:-:16275983:16278937:CG9992::5	AFE	E1,E2,E5	E4,E5	3.80666	1.99655	-1.81011	0.00686654	0.0652777	0.880841	0.548862	0.331979
